# Supplementary material for: Automated Analysis and Classification of Histological Tissue Features by Multi-Dimensional Microscopic Molecular Profiling
Source: PLoS One. 2015 Jul 15;10(7):e0128975. doi: 10.1371/journal.pone.0128975 (PMC4503351; doi:10.1371/journal.pone.0128975)
Supplement: S5 Table — (XLS) [file pone.0128975.s011.xls]

## Sheet: RSQ_Values
Sample ID	b.01.lyve1	b.29.sma	r.01.lyve1	r.03.sparc	r.05.cd34	r.07.ace	r.09.mmp11	r.11.fzd7	r.13.cd105	r.15.col4a2	r.17.ctgf	r.19.bcat	r.21.dkk3	r.23.cd44	r.25.desmin	r.27.col1	r.29.sma	r.32.he	g.32.he	b.32.he	r.33.alcian	g.33.alcian	b.33.alcian	r.34.pas	g.34.pas	b.34.pas	r.35.verhoeffs	g.35.verhoeffs	b.35.verhoeffs
1.1.1	0.926694	0.939503	0.002956	0.434282	0.884469	0.855175	0.884564	0.829554	0.716043	0.723522	0.788735	0.366805	0.359424	0.783851	0.674011	0.831431	0.196787	0.929136	0.959707	0.939576	0.911083	0.883483	0.860893	0.88494	0.941073	0.919967	0.985343	0.985237	0.976775
1.1.10	0.892392	0.899303	0.003805	0.25678	0.858148	0.82467	0.867191	0.780123	0.602145	0.482569	0.796671	0.753478	0.611484	0.024975	0.678753	0.890365	0.410601	0.933634	0.96887	0.955226	0.929431	0.874768	0.852973	0.914627	0.951291	0.926717	0.987373	0.986909	0.979403
1.1.7	0.84	0.8642	0.6919	0.7223	0.7779	0.8603	0.8626	0.4351	0.6355	0.795	0.8616	0.8546	0.5047	0.2981	0.387	0.9757	0.8838	0.912	0.9473	0.9261	0.8999	0.8632	0.8591	0.8811	0.9312	0.9007	0.9839	0.9832	0.9754
1.1.8	0.9082	0.9186	0.1436	0.4863	0.867	0.8452	0.8866	0.8333	0.7625	0.674	0.8352	0.7983	0.7603	0.8489	0.9597	0.9198	0.9399	0.9	0.9455	0.9266	0.8902	0.8543	0.8327	0.8628	0.9347	0.9036	0.9807	0.9801	0.9668
1.10.1	0.9636	0.9482	0.121	0.7127	0.9182	0.8811	0.8935	0.8251	0.7017	0.8218	0.8685	0.9357	0.5591	0.9092	0.7891	0.8322	0.2655	0.9498	0.9742	0.9609	0.9354	0.9046	0.8902	0.9082	0.961	0.9441	0.9909	0.9907	0.9832
1.10.10	0.954227	0.921886	0.005233	0.563677	0.920135	0.876185	0.877144	0.801048	0.748686	0.797411	0.873727	0.926692	0.791565	0.870043	0.766111	0.790994	0.592449	0.918615	0.96439	0.947379	0.868988	0.828476	0.826578	0.859958	0.942557	0.914679	0.986738	0.985876	0.97715
1.10.2	0.961861	0.941049	0.002787	0.790595	0.77544	0.688563	0.770663	0.58344	0.311849	0.692805	0.796045	0.564033	0.842247	0.719799	0.233836	0.915317	0.744966	0.933987	0.958897	0.943493	0.92061	0.903486	0.892214	0.893883	0.941332	0.914209	0.982481	0.982425	0.968926
1.10.5	0.9672	0.9161	0.3688	0.7703	0.8476	0.7865	0.8391	0.6619	0.558	0.7528	0.7999	0.6697	0.4013	0.616	0.3611	0.9763	0.8283	0.9114	0.951	0.9338	0.9138	0.8873	0.871	0.8803	0.9465	0.9199	0.9815	0.9807	0.9662
1.10.6	0.96334	0.91804	0.00992	0.23106	0.78995	0.73033	0.79815	0.75749	0.299	0.43073	0.72794	0.80353	0.83402	0.81461	0.16516	0.97448	0.77982	0.91067	0.94573	0.92337	0.90368	0.8518	0.83142	0.87982	0.94038	0.91051	0.98681	0.98636	0.97568
1.10.7	0.9613	0.9392	0.2994	0.7977	0.8506	0.8062	0.8292	0.4555	0.3519	0.7319	0.8814	0.8597	0.561	0.6981	0.7861	0.945	0.8893	0.9242	0.9538	0.9389	0.9135	0.8844	0.8722	0.8917	0.9284	0.8984	0.9846	0.9824	0.9672
1.10.8	0.9274	0.8654	0.1521	0.6881	0.8754	0.8114	0.8505	0.8565	0.6733	0.779	0.8824	0.9476	0.8088	0.9024	0.8284	0.6799	0.8204	0.9228	0.9536	0.939	0.905	0.8459	0.8314	0.884	0.9416	0.9216	0.9855	0.9845	0.9749
1.10.9	0.9524	0.9227	0.6008	0.4424	0.8774	0.7066	0.8049	0.8303	0.6805	0.7399	0.8718	0.9285	0.3564	0.8481	0.3049	0.0313	0.7084	0.9657	0.9799	0.9713	0.9478	0.938	0.92	0.9334	0.9305	0.9232	0.9919	0.9887	0.9814
1.2.10	0.942158	0.92875	0.784465	0.541909	0.899462	0.875939	0.920228	0.710903	0.811243	0.773775	0.894349	0.892704	0.088372	0.001831	0.406459	0.738316	0.709875	0.952344	0.97762	0.966928	0.924153	0.910329	0.901543	0.89056	0.946282	0.934073	0.991557	0.9901	0.982219
1.2.6	0.85497	0.82618	0.08982	0.52252	0.82342	0.86573	0.87885	0.4646	0.52707	0.68357	0.88473	0.84485	0.71997	0.61996	0.96039	0.91521	0.97565	0.86225	0.92668	0.9008	0.86301	0.77346	0.75107	0.85056	0.92497	0.88263	0.98238	0.98014	0.96471
1.2.7	0.9068	0.8914	0.2693	0.6307	0.764	0.7449	0.8381	0.8339	0.525	0.6489	0.851	0.63	0.786	0.7715	0.7376	0.9532	0.7781	0.9427	0.9732	0.9584	0.9397	0.9044	0.8882	0.9176	0.9551	0.9329	0.9892	0.9865	0.9772
1.2.8	0.86558	0.91392	0.09109	0.8662	0.90412	0.87315	0.9242	0.35852	0.68239	0.72133	0.90277	0.83199	0.60012	0.67731	0.43785	0.74967	0.61403	0.94775	0.97645	0.96179	0.93288	0.90985	0.8959	0.90611	0.95902	0.94155	0.99366	0.99254	0.98478
1.3.1	0.9539	0.9251	0.1157	0.6518	0.8612	0.7997	0.8535	0.8213	0.7755	0.4805	0.7913	0.4657	0.6756	0.6145	0.1348	0.8995	0.8781	0.9626	0.9798	0.9712	0.9533	0.9318	0.9156	0.9373	0.9631	0.9509	0.9937	0.9931	0.988
1.3.10	0.95838	0.95098	0.02799	0.23078	0.80042	0.68932	0.81783	0.44358	0.53882	0.57478	0.74978	0.75067	0.3772	0.12418	0.31187	0.81625	0.7621	0.94072	0.96988	0.95075	0.92475	0.90322	0.8862	0.9137	0.95278	0.92959	0.99038	0.9895	0.9789
1.3.2	0.9049	0.8458	0.1597	0.3835	0.6533	0.4989	0.7456	0.7686	0.9208	0.3718	0.6636	0.5019	0.1031	0.667	0.1165	0.8956	0.2164	0.9178	0.9438	0.9277	0.8782	0.8166	0.7829	0.8919	0.9333	0.9014	0.9943	0.9942	0.9887
1.3.5	0.947	0.9029	0.7816	0.8828	0.8794	0.8661	0.9267	0.8021	0.765	0.8578	0.9199	0.8329	0.8824	0.7405	0.7875	0.7876	0.6606	0.9448	0.9668	0.9501	0.9476	0.9054	0.8829	0.9385	0.9717	0.9579	0.9905	0.9903	0.9825
1.3.6	0.891486	0.817995	0.005169	0.391078	0.867314	0.805135	0.864042	0.895603	0.46014	0.546268	0.801843	0.799636	0.636506	0.858525	0.814742	0.434301	0.960711	0.906916	0.946846	0.927447	0.886962	0.833044	0.824779	0.853874	0.918542	0.878415	0.988314	0.986213	0.975043
1.3.7	0.910752	0.869528	0.001254	0.119435	0.816149	0.724026	0.819166	0.421871	0.593291	0.600234	0.787846	0.755443	0.821574	0.613386	0.562355	0.601876	0.910279	0.93841	0.966808	0.949658	0.945341	0.902473	0.887096	0.91589	0.945774	0.915443	0.986876	0.986654	0.974078
1.3.8	0.93229	0.91653	0.07256	0.63084	0.85616	0.78182	0.89841	0.72269	0.57443	0.66822	0.84479	0.84439	0.87381	0.78089	0.49301	0.81803	0.55332	0.94338	0.96957	0.95576	0.92671	0.91545	0.90056	0.89104	0.93351	0.912	0.98702	0.98406	0.97305
1.3.9	0.92149	0.92533	0.42354	0.59676	0.86991	0.82362	0.9197	0.82923	0.71453	0.71103	0.88621	0.86684	0.47325	0.45155	0.35188	0.01032	0.73109	0.97067	0.98389	0.97206	0.95516	0.94853	0.93265	0.94647	0.9256	0.91979	0.9932	0.9898	0.9821
1.4.5	0.9196	0.8672	0.2194	0.6022	0.9232	0.8457	0.933	0.8698	0.7521	0.7513	0.844	0.9125	0.9068	0.8966	0.7137	0.8497	0.0681	0.9018	0.9465	0.9228	0.9134	0.8532	0.8276	0.9039	0.9633	0.946	0.9865	0.9857	0.9764
1.4.7	0.94215	0.91564	0.06375	0.74347	0.7903	0.74267	0.84818	0.21097	0.72757	0.70961	0.88089	0.85313	0.83787	0.732	0.61474	0.79378	0.33524	0.95489	0.97057	0.95556	0.93818	0.92691	0.90448	0.90136	0.92377	0.90561	0.99091	0.98859	0.98104
1.5.1	0.936848	0.888203	0.524045	0.383302	0.504937	0.438363	0.627442	0.485605	0.0258971	0.668323	0.455899	0.618005	0.508052	0.0009655	0.756083	0.920754	0.809153	0.852904	0.900711	0.881764	0.790842	0.789889	0.761934	0.731336	0.865188	0.82636	0.980173	0.979378	0.963095
1.5.2	0.93831	0.92123	0.01338	0.64462	0.82223	0.70526	0.82784	0.8003	0.53163	0.63953	0.81866	0.61718	0.83305	0.65618	0.524	0.95756	0.71854	0.90103	0.94418	0.92443	0.90288	0.8742	0.85854	0.87632	0.94084	0.91018	0.98469	0.98299	0.97156
1.5.5	0.95805	0.86925	0.03531	0.45371	0.80238	0.74773	0.83194	0.47945	0.45771	0.63678	0.78518	0.5936	0.82589	0.74812	0.34027	0.56533	0.49495	0.93663	0.96394	0.94638	0.9507	0.92364	0.9068	0.93801	0.96129	0.93573	0.98543	0.98582	0.97511
1.5.7	0.913	0.91165	0.09476	0.52556	0.8277	0.67453	0.81495	0.87649	0.47595	0.45494	0.82817	0.72939	0.79872	0.66818	0.78558	0.81643	0.86234	0.94777	0.97062	0.95912	0.94687	0.92298	0.89957	0.92856	0.95314	0.93304	0.99195	0.99039	0.98072
1.5.8	0.8638	0.8728	0.4689	0.7106	0.8289	0.8318	0.8709	0.5666	0.7515	0.7761	0.8574	0.833	0.6391	0.7429	0.6851	0.8974	0.7055	0.8838	0.942	0.9231	0.9009	0.8639	0.8416	0.8793	0.9408	0.9068	0.9887	0.9855	0.9703
1.5.9	0.92554	0.916768	0.170627	0.271538	0.815081	0.721629	0.828575	0.032212	0.514659	0.410206	0.81147	0.865373	0.451512	0.318025	0.175437	0.001839	0.010196	0.957912	0.97371	0.960527	0.948972	0.940219	0.91782	0.920541	0.914108	0.912417	0.98903	0.986375	0.97548
1.6.1	0.94219	0.9134	0.05621	0.60286	0.86461	0.77272	0.86065	0.78247	0.015	0.73324	0.86005	0.66848	0.02135	0.39542	0.41484	0.77869	0.79994	0.92242	0.9567	0.94006	0.92992	0.90078	0.88224	0.90199	0.94289	0.92413	0.99096	0.99029	0.98115
1.6.2	0.9395	0.905	0.589	0.6826	0.8996	0.8624	0.9337	0.9192	0.8021	0.7849	0.841	0.9365	0.6433	0.8923	0.4996	0.9214	0.4526	0.8719	0.9284	0.91	0.8808	0.8235	0.8132	0.8728	0.9275	0.8973	0.9862	0.9845	0.9703
1.6.6	0.8953	0.8925	0.1091	0.5862	0.8627	0.8194	0.8656	0.4149	0.809	0.8236	0.9034	0.8572	0.8732	0.7863	0.7614	0.8721	0.4707	0.9517	0.9707	0.9592	0.9473	0.9268	0.9188	0.9355	0.9546	0.9396	0.9903	0.9887	0.9827
1.6.7	0.9345	0.9053	0.5866	0.7863	0.8679	0.8453	0.8692	0.8222	0.6967	0.8187	0.8977	0.8156	0.9432	0.7209	0.8698	0.9256	0.858	0.931	0.9576	0.9427	0.9348	0.9115	0.8939	0.9184	0.9473	0.924	0.985	0.9839	0.9735
1.6.8	0.9046	0.8884	0.4478	0.7326	0.7962	0.8108	0.8246	0.6638	0.7817	0.8249	0.882	0.7535	0.8748	0.65	0.8636	0.6672	0.8992	0.9301	0.9568	0.9412	0.9209	0.8926	0.8762	0.8967	0.9379	0.9207	0.9882	0.9865	0.9749
1.7.10	0.9506	0.9323	0.552	0.6886	0.9296	0.8798	0.9035	0.8194	0.5811	0.829	0.9342	0.9593	0.859	0.7927	0.7905	0.5257	0.4801	0.9543	0.981	0.9724	0.9409	0.9269	0.9164	0.906	0.9672	0.9542	0.9963	0.9958	0.9911
1.7.5	0.9451	0.8572	0.5822	0.7172	0.7727	0.8003	0.7544	0.6071	0.4937	0.7072	0.8069	0.7285	0.0977	0.5185	0.614	0.9641	0.5308	0.9161	0.9447	0.9313	0.9416	0.8863	0.8553	0.9287	0.9453	0.9083	0.9836	0.9821	0.9738
1.7.6	0.945	0.9202	0.8011	0.7653	0.912	0.8621	0.8998	0.6517	0.6277	0.8046	0.9137	0.9016	0.593	0.7005	0.8322	0.8768	0.2949	0.9462	0.9719	0.9606	0.9478	0.9272	0.915	0.9306	0.96	0.9411	0.9889	0.9885	0.9805
1.7.7	0.83854	0.68489	0.02468	0.2205	0.76358	0.80149	0.71283	0.68138	0.47853	0.6526	0.69682	0.76498	0.84717	0.63771	0.45667	0.93803	0.89615	0.9192	0.94912	0.93418	0.91851	0.86733	0.84337	0.90458	0.95368	0.9248	0.98801	0.9882	0.97861
1.7.8	0.94886	0.89935	0.59846	0.77906	0.88447	0.8426	0.86349	0.62412	0.64216	0.79926	0.91437	0.93893	0.48126	0.69494	0.69154	0.00807	0.36523	0.95643	0.97617	0.9673	0.95241	0.93177	0.92035	0.93084	0.96135	0.94633	0.99165	0.99167	0.98525
1.7.9	0.91711	0.89461	0.12955	0.50557	0.89868	0.76407	0.77847	0.77894	0.61183	0.61773	0.87584	0.9494	0.2669	0.50148	0.37776	0.01239	0.10362	0.97361	0.98141	0.9742	0.95559	0.94718	0.92535	0.94594	0.9323	0.918	0.99331	0.98933	0.98433
1.8.10	0.96558	0.93436	0.51774	0.59562	0.88315	0.86344	0.84215	0.63534	0.20742	0.61363	0.91028	0.93286	0.87702	0.82653	0.6954	0.02665	0.64366	0.94531	0.97339	0.96269	0.92925	0.92092	0.9133	0.89183	0.95625	0.93968	0.99346	0.99333	0.98621
1.8.2	0.9677	0.9406	0.1386	0.7684	0.8033	0.7899	0.8067	0.6498	0.5936	0.6751	0.8698	0.7028	0.55	0.7147	0.3289	0.9284	0.5518	0.9484	0.9718	0.9606	0.9472	0.9131	0.8969	0.9185	0.9596	0.9278	0.99	0.9903	0.982
1.8.5	0.9573	0.918	0.1874	0.8732	0.8928	0.8802	0.8614	0.7893	0.788	0.8271	0.9204	0.7563	0.6165	0.818	0.7135	0.5994	0.4172	0.9452	0.9666	0.954	0.9395	0.9227	0.9039	0.9131	0.9489	0.924	0.9874	0.9863	0.9767
1.8.6	0.9574	0.9374	0.0529	0.5404	0.834	0.7571	0.8007	0.7202	0.267	0.4062	0.8418	0.6593	0.515	0.8568	0.7807	0.9554	0.847	0.9495	0.9738	0.9624	0.9496	0.9114	0.8889	0.9441	0.9749	0.9574	0.9941	0.9928	0.987
1.8.7	0.922428	0.910655	0.009032	0.255616	0.895973	0.838693	0.900374	0.890153	0.66762	0.500133	0.883638	0.689626	0.319172	0.863588	0.948518	0.906534	0.945913	0.920655	0.957716	0.945691	0.924551	0.882204	0.86877	0.898521	0.949917	0.927818	0.98554	0.986113	0.977823
1.8.9	0.9049	0.92643	0.78032	0.76548	0.90917	0.88762	0.90617	0.8216	0.82816	0.87865	0.94554	0.92658	0.5201	0.59121	0.70614	0.04627	0.1873	0.96331	0.981	0.97131	0.94422	0.92334	0.89701	0.93156	0.93622	0.92517	0.99449	0.99234	0.98633
1.9.1	0.96277	0.89025	0.04159	0.60371	0.51918	0.84153	0.62443	0.7319	0.67046	0.79421	0.6376	0.60736	0.4345	0.15473	0.10417	0.94911	0.53881	0.92293	0.95773	0.94057	0.91128	0.89357	0.87606	0.87903	0.93579	0.91304	0.98214	0.98253	0.97188
1.9.10	0.9723	0.9459	6.083e-05	0.117	0.7449	0.496	0.6959	0.09845	0.5958	0.5627	0.7865	0.5571	0.5725	0.009106	0.2068	0.01106	0.7177	0.9677	0.9815	0.973	0.9486	0.9349	0.9196	0.9254	0.9512	0.9392	0.993	0.9918	0.9869
1.9.2	0.9438	0.9002	0.1224	0.6448	0.8935	0.8808	0.9347	0.9629	0.7648	0.7365	0.7735	0.9175	0.4502	0.9553	0.2537	0.9385	0.5809	0.8985	0.9354	0.9145	0.9136	0.8712	0.8515	0.8769	0.9221	0.8857	0.9779	0.9771	0.9621
1.9.6	0.9517	0.9207	0.2143	0.808	0.8637	0.8589	0.848	0.6248	0.4811	0.7219	0.9	0.8658	0.6169	0.794	0.6929	0.9452	0.8359	0.9401	0.9682	0.9565	0.9205	0.8937	0.8751	0.8952	0.9545	0.9294	0.9898	0.9896	0.9823
1.9.7	0.956704	0.947025	0.094039	0.657978	0.88098	0.946327	0.897436	0.820373	0.818048	0.851449	0.908821	0.847348	0.90649	0.872213	0.803138	0.006997	0.86535	0.943068	0.969466	0.959489	0.930953	0.8965	0.878048	0.911415	0.955307	0.929707	0.987738	0.988826	0.981971
1.9.8	0.91168	0.89811	0.09076	0.34965	0.85651	0.7932	0.85617	0.80064	0.61129	0.56661	0.91573	0.90647	0.73944	0.74857	0.97916	0.94933	0.97666	0.89791	0.94049	0.91947	0.88698	0.82709	0.80713	0.84695	0.93234	0.90581	0.98489	0.98627	0.97603
1.9.9	0.918261	0.938243	0.083537	0.492506	0.831771	0.778793	0.87408	0.552208	0.604159	0.690911	0.886769	0.925333	0.380438	0.526434	0.503197	0.009424	0.463847	0.969133	0.981041	0.971215	0.950017	0.941407	0.921935	0.943793	0.926295	0.912594	0.991723	0.988077	0.980757
2.1.1	0.94226	0.94043	0.02791	0.64318	0.91488	0.88813	0.89859	0.87486	0.56785	0.77779	0.88786	0.92337	0.68516	0.91874	0.73701	0.75847	0.13337	0.94442	0.97082	0.95719	0.91834	0.89463	0.87831	0.8914	0.95566	0.93516	0.99014	0.98979	0.98102
2.1.3	0.9696	0.947	0.5936	0.8187	0.8556	0.8817	0.8888	0.8118	0.6019	0.8135	0.8895	0.8011	0.7547	0.7241	0.6013	0.873	0.4384	0.9515	0.9741	0.9632	0.9455	0.9193	0.9016	0.9277	0.9623	0.9521	0.9887	0.9904	0.9811
2.1.4	0.9535	0.9213	0.0625	0.8733	0.6834	0.7848	0.7321	0.7395	0.3962	0.73	0.7785	0.5746	0.125	0.7132	0.3077	0.9249	0.5597	0.9058	0.9468	0.9246	0.9102	0.8571	0.8304	0.8849	0.9458	0.9081	0.9848	0.9831	0.971
2.1.8	0.9607	0.8697	0.5604	0.5105	0.7131	0.7478	0.7468	0.7881	0.3291	0.6674	0.7356	0.5909	0.6771	0.6333	0.7008	0.9808	0.8415	0.9395	0.9638	0.9484	0.9541	0.9276	0.9112	0.9433	0.9658	0.9426	0.9883	0.9878	0.9795
2.1.9	0.9357	0.8915	0.195	0.6483	0.8989	0.8956	0.8697	0.8191	0.6221	0.803	0.8668	0.9476	0.9501	0.9667	0.8755	0.7802	0.6916	0.9239	0.9561	0.9387	0.897	0.8515	0.8425	0.8794	0.9399	0.913	0.9837	0.9837	0.9759
2.10.1	0.947749	0.896316	0.0006533	0.490096	0.902774	0.874402	0.898176	0.838326	0.358555	0.734654	0.84279	0.65266	0.534541	0.685119	0.584004	0.732408	0.627052	0.900047	0.933576	0.91611	0.791267	0.750185	0.734041	0.822839	0.917292	0.890214	0.978741	0.980004	0.970145
2.10.2	0.958616	0.89417	0.001155	0.084663	0.818113	0.690464	0.850791	0.618694	0.132645	0.564572	0.815529	0.466626	0.017085	0.61034	0.073104	0.015351	0.76743	0.959296	0.978565	0.96714	0.948267	0.932827	0.920962	0.9228	0.948645	0.931987	0.98975	0.989674	0.98342
2.10.7	0.961651	0.866836	0.112885	0.42796	0.91858	0.831762	0.930987	0.785851	0.427005	0.787881	0.903143	0.472141	0.023678	0.790695	0.269222	0.002528	0.024293	0.957102	0.977072	0.967289	0.937614	0.926159	0.917787	0.921246	0.937377	0.925212	0.993578	0.991389	0.985144
2.10.8	0.95149	0.87406	0.01415	0.20383	0.79556	0.59624	0.8181	0.66468	0.39437	0.2731	0.52458	0.18602	0.54135	0.63155	0.70129	0.92892	0.41202	0.93911	0.96149	0.94408	0.91765	0.87747	0.8493	0.8895	0.93153	0.89674	0.9856	0.98648	0.97619
2.2.1	0.9158	0.9124	0.319	0.6964	0.9197	0.8856	0.9024	0.7816	0.4696	0.7397	0.8659	0.8691	0.5609	0.8969	0.7442	0.8782	0.8841	0.923	0.954	0.9365	0.9053	0.8738	0.8584	0.886	0.95	0.9285	0.987	0.9867	0.9764
2.2.3	0.90541	0.87057	0.08739	0.52351	0.78634	0.74147	0.80991	0.764	0.25077	0.63889	0.81101	0.84737	0.71425	0.79281	0.27733	0.79345	0.36264	0.93645	0.96352	0.94656	0.9302	0.90146	0.88587	0.9064	0.9517	0.92951	0.98751	0.98643	0.97761
2.2.4	0.9166	0.848	0.4066	0.7399	0.7395	0.7675	0.8196	0.7998	0.6922	0.7724	0.7967	0.8006	0.3053	0.8364	0.2726	0.9158	0.3369	0.9264	0.9501	0.9355	0.9225	0.8633	0.8436	0.9205	0.9484	0.9218	0.9851	0.9858	0.9808
2.2.7	0.9499	0.9282	0.3528	0.6859	0.8349	0.8323	0.8216	0.4654	0.8428	0.8859	0.9184	0.9619	0.4495	0.8046	0.752	0.514	0.6411	0.9164	0.9513	0.9309	0.9052	0.8768	0.8599	0.8782	0.9443	0.9194	0.9886	0.9854	0.9743
2.2.8	0.9651	0.89425	0.11891	0.54022	0.8573	0.82424	0.8695	0.67814	0.29683	0.81302	0.86157	0.71497	0.03142	0.7104	0.4401	0.72507	0.87592	0.93904	0.96915	0.951	0.93788	0.90055	0.88285	0.91839	0.95128	0.94389	0.98768	0.98753	0.97632
2.2.9	0.98207	0.95022	0.00809	0.42646	0.72055	0.60252	0.66808	0.52871	0.14575	0.58873	0.73441	0.8309	0.76865	0.70801	0.64242	0.63321	0.08093	0.95584	0.97538	0.96238	0.93198	0.91836	0.90525	0.91467	0.95282	0.94527	0.98918	0.99022	0.98205
2.3.1	0.941115	0.927726	0.0003494	0.445252	0.859563	0.597195	0.80512	0.458096	0.0062602	0.238367	0.857188	0.122201	0.49736	0.509311	0.954907	0.818403	0.934201	0.961961	0.982417	0.975579	0.949403	0.93997	0.932097	0.931321	0.969445	0.956848	0.995032	0.994589	0.989334
2.3.3	0.951103	0.91923	0.004497	0.48853	0.778559	0.746344	0.777377	0.920844	0.513556	0.588859	0.720521	0.759638	0.397958	0.800997	0.128234	0.946143	0.625568	0.893718	0.938616	0.912595	0.933953	0.877103	0.839631	0.928671	0.955607	0.927941	0.983572	0.982002	0.966967
2.3.7	0.947415	0.924214	0.006381	0.192863	0.833531	0.77018	0.803833	0.303036	0.02018	0.557676	0.81582	0.669228	0.005654	0.795092	0.850893	0.872398	0.903425	0.923031	0.951877	0.934691	0.916326	0.88644	0.870622	0.875617	0.934155	0.911966	0.981662	0.980401	0.967395
2.3.8	0.87882	0.80873	0.06495	0.42433	0.93067	0.90793	0.89392	0.81607	0.6051	0.79787	0.86019	0.84112	0.33133	0.89833	0.28789	0.66382	0.34195	0.91254	0.95736	0.94711	0.87105	0.82797	0.82581	0.86057	0.92793	0.90127	0.98786	0.98775	0.98051
2.3.9	0.981	0.9196	2.673e-05	0.04782	0.6271	0.5716	0.6014	0.1105	0.1669	0.1375	0.6841	0.4023	0.005846	0.08085	0.5369	0.9371	0.6528	0.9522	0.9741	0.9597	0.9388	0.9091	0.8991	0.9279	0.9614	0.9458	0.9885	0.9893	0.9826
2.4.1	0.94508	0.90052	0.01103	0.7903	0.86342	0.75214	0.84118	0.72891	0.63154	0.63278	0.846	0.77467	0.21558	0.82599	0.50963	0.81594	0.65105	0.96249	0.98053	0.96839	0.95267	0.93583	0.92099	0.93149	0.9689	0.95137	0.99276	0.99259	0.98598
2.4.2	0.9191	0.9199	0.3837	0.7772	0.8522	0.8449	0.8717	0.7492	0.6017	0.7975	0.8737	0.7999	0.4692	0.8281	0.3839	0.9206	0.5967	0.937	0.9567	0.9436	0.9314	0.9182	0.8959	0.9096	0.9245	0.8831	0.9788	0.9765	0.9643
2.4.3	0.958163	0.928111	0.006446	0.54384	0.743488	0.769696	0.783362	0.57748	0.615308	0.822459	0.799592	0.73697	0.451211	0.731836	0.48543	0.96392	0.67898	0.910663	0.94709	0.924193	0.927326	0.878933	0.854555	0.896901	0.944503	0.916096	0.982619	0.98085	0.968115
2.4.8	0.93988	0.89172	0.02224	0.55416	0.81851	0.90519	0.76252	0.13059	0.76788	0.72831	0.83427	0.75073	0.09778	0.75809	0.30453	0.75391	0.91012	0.95118	0.9713	0.95823	0.94512	0.91206	0.89561	0.9223	0.96321	0.9515	0.99077	0.99054	0.98346
2.5.1	0.9088	0.8844	6.117e-05	0.01054	0.837	0.7142	0.8442	0.4162	0.694	0.2675	0.8109	0.28	0.05671	0.6357	0.9519	0.5198	0.9624	0.9142	0.9561	0.9359	0.8918	0.8599	0.8593	0.8212	0.9255	0.9092	0.9864	0.9854	0.9745
2.5.7	0.92105	0.91289	0.01988	0.59619	0.81142	0.72116	0.83719	0.55254	0.70503	0.70637	0.81837	0.83216	0.83026	0.80359	0.93868	0.13854	0.41327	0.92143	0.95345	0.93429	0.90487	0.86737	0.83173	0.86774	0.9392	0.91373	0.98447	0.98026	0.96694
2.5.8	0.961112	0.933112	0.0009507	0.173777	0.746972	0.585962	0.754959	0.435314	0.489406	0.215343	0.643864	0.732619	0.0977321	0.742774	0.297051	0.697587	0.081008	0.955387	0.973236	0.960818	0.948525	0.917945	0.901273	0.935988	0.966246	0.951422	0.991749	0.992138	0.985455
2.5.9	0.9475	0.8798	0.0585	0.3171	0.8645	0.7879	0.8535	0.4031	0.4237	0.5005	0.8333	0.8838	0.8516	0.8479	0.4182	0.6488	0.5354	0.9336	0.9691	0.9542	0.9244	0.8883	0.8796	0.9098	0.9499	0.9315	0.99	0.989	0.9805
2.6.1	0.94045	0.90809	0.01028	0.0505	0.90348	0.8376	0.91081	0.93225	0.38686	0.66937	0.77307	0.83997	0.03161	0.92354	0.92326	0.87909	0.92328	0.88399	0.93037	0.91169	0.89713	0.84351	0.82485	0.88974	0.92045	0.93005	0.98381	0.98178	0.96827
2.6.7	0.958034	0.920116	0.001086	0.416457	0.691244	0.649905	0.751163	0.518228	0.655519	0.563532	0.742167	0.598291	0.472939	0.692515	0.55221	0.566437	0.819969	0.93488	0.965595	0.949452	0.933837	0.901466	0.884466	0.917245	0.950527	0.931054	0.990742	0.989955	0.982332
2.6.8	0.97029	0.932359	0.0006181	0.107442	0.70903	0.594946	0.730638	0.117538	0.281159	0.135634	0.664085	0.162512	0.0061322	0.795631	0.253539	0.852739	0.010608	0.956802	0.975876	0.962147	0.95013	0.928234	0.903398	0.920073	0.954786	0.928592	0.988296	0.987842	0.979611
2.6.9	0.93959	0.8621	0.02272	0.28901	0.84442	0.81586	0.82445	0.67147	0.71959	0.59489	0.78008	0.34296	0.78564	0.7747	0.18295	0.01842	0.18485	0.93912	0.96632	0.95709	0.93892	0.90288	0.89414	0.91532	0.94594	0.92148	0.98591	0.98543	0.97549
2.7.1	0.9654	0.9367	2.796e-05	0.04365	0.9209	0.7554	0.9194	0.7946	0.2812	0.4134	0.8848	0.4365	0.6574	0.7467	0.8734	0.6923	0.8805	0.9535	0.9761	0.9681	0.9337	0.9245	0.9123	0.9169	0.9618	0.9467	0.9933	0.9926	0.9849
2.7.2	0.972669	0.917078	0.006986	0.13509	0.872192	0.790968	0.849835	0.855426	0.162857	0.214973	0.788263	0.612019	0.540442	0.85486	0.156902	0.745089	0.046838	0.958981	0.979421	0.965032	0.96087	0.936532	0.910934	0.949947	0.977163	0.959334	0.990209	0.991361	0.983782
2.7.3	0.909	0.8378	0.4961	0.7165	0.8783	0.854	0.9032	0.9085	0.7717	0.8373	0.8687	0.7939	0.5052	0.8833	0.4997	0.8277	0.5155	0.9056	0.9342	0.9171	0.9166	0.8626	0.8429	0.8924	0.9347	0.9114	0.981	0.9788	0.9658
2.7.7	0.96924	0.91831	0.01115	0.70994	0.88774	0.84729	0.90791	0.72078	0.52295	0.60798	0.87719	0.71718	0.00976	0.82628	0.39322	0.03521	0.01088	0.9619	0.98006	0.97073	0.9699	0.94839	0.9276	0.95248	0.96553	0.93336	0.99178	0.99093	0.9813
2.7.8	0.9447	0.8891	0.6724	0.7077	0.8899	0.8798	0.9234	0.8394	0.733	0.7448	0.9181	0.9509	0.4196	0.8781	0.6518	0.0021	0.2125	0.9183	0.9544	0.9305	0.8804	0.8675	0.8512	0.8513	0.9126	0.8836	0.9854	0.9826	0.9674
2.7.9	0.9491	0.90093	0.21154	0.53822	0.85162	0.89813	0.87509	0.82959	0.66669	0.74753	0.83242	0.67706	0.03516	0.83761	0.30718	0.78789	0.02946	0.90811	0.94138	0.92472	0.86248	0.81873	0.8083	0.86034	0.927	0.91196	0.97686	0.97694	0.96216
2.8.1	0.9585	0.9122	0.2393	0.7374	0.7953	0.7433	0.828	0.686	0.7036	0.7673	0.8361	0.2156	0.6675	0.7044	0.6021	0.8769	0.8719	0.9342	0.9639	0.9477	0.9331	0.9051	0.8815	0.9082	0.954	0.9284	0.9878	0.9879	0.9782
2.8.4	0.9477	0.9071	0.9103	0.597	0.8525	0.8295	0.8928	0.7834	0.5466	0.6865	0.7713	0.8898	0.1631	0.7718	0.314	0.9585	0.6809	0.9095	0.9507	0.9326	0.8854	0.8519	0.833	0.855	0.9053	0.8731	0.9835	0.9821	0.97
2.8.8	0.960157	0.875913	0.008023	0.280995	0.872701	0.747808	0.861288	0.723737	0.0777	0.170952	0.793589	0.622596	0.018666	0.809425	0.181544	0.037591	0.046273	0.964815	0.976962	0.96605	0.945015	0.936704	0.925005	0.920447	0.959459	0.935597	0.989321	0.989369	0.980648
2.8.9	0.93838	0.88392	0.01911	0.48028	0.92358	0.86968	0.91729	0.88034	0.39476	0.63575	0.84605	0.88249	0.64998	0.8528	0.62037	0.61706	0.57881	0.92408	0.95276	0.93391	0.89202	0.84996	0.83322	0.87446	0.94181	0.91099	0.98607	0.98581	0.97667
2.9.1	0.91428	0.88569	0.11899	0.58029	0.86718	0.75937	0.88543	0.77502	0.23977	0.75342	0.85226	0.39929	0.02469	0.51757	0.23213	0.01841	0.01913	0.93104	0.95548	0.93991	0.90364	0.90556	0.89098	0.81348	0.8975	0.81899	0.98658	0.98481	0.9744
2.9.2	0.94561	0.89015	0.32466	0.56118	0.82818	0.80683	0.83537	0.76256	0.42952	0.69485	0.75582	0.05174	0.53401	0.77053	0.053	0.76271	0.79655	0.94688	0.96924	0.95523	0.92634	0.89619	0.88067	0.89707	0.95219	0.923	0.99314	0.99344	0.98523
2.9.3	0.9734	0.9393	0.9279	0.9218	0.9033	0.8926	0.905	0.8846	0.7877	0.841	0.8825	0.7885	0.4463	0.8624	0.4956	0.9008	0.3805	0.9379	0.969	0.9563	0.888	0.8298	0.8135	0.9151	0.9565	0.9255	0.987	0.9867	0.9805
2.9.8	0.891401	0.790023	0.002081	0.02178	0.865285	0.740877	0.868202	0.628289	0.181789	0.476576	0.829371	0.285763	0.568857	0.701579	0.964269	0.8292	0.956111	0.898641	0.931348	0.911688	0.845739	0.793208	0.77692	0.820929	0.916427	0.884641	0.987871	0.987764	0.9789

## Sheet: KM_Centroids
Sample ID	K Value	Cluster #	b.01.lyve1	b.29.sma	r.01.lyve1	r.03.sparc	r.05.cd34	r.07.ace	r.09.mmp11	r.11.fzd7	r.13.cd105	r.15.col4a2	r.17.ctgf	r.19.bcat	r.21.dkk3	r.23.cd44	r.25.desmin	r.27.col1	r.29.sma	r.32.he	g.32.he	b.32.he	r.33.alcian	g.33.alcian	b.33.alcian	r.34.pas	g.34.pas	b.34.pas	r.35.verhoeffs	g.35.verhoeffs	b.35.verhoeffs
1.10.7	10	1	26.3148	22.6136	0.372629	3.57236	8.52486	1.03679	1.36902	0.006232	0.007472	0.262441	7.41921	10.3741	1.24778	0.176887	1.12156	15.4081	5.84953	60.5904	95.1745	62.9904	87.6264	37.3165	29.2513	77.8824	99.6484	51.2229	186.249	174.584	135.357
1.10.7	10	2	222.063	178.038	5.11653	30.5262	59.6653	25.2335	29.3626	0.166094	0.633849	11.9728	40.1546	61.8538	1.16875	3.66913	4.00648	1.05569	11.6663	142.596	177.802	127.455	133.76	91.0438	70.0075	101.824	110.89	68.8789	222.747	213.887	183
1.10.7	10	3	196.165	104.417	2.21353	21.9693	34.9983	13.0963	13.9768	0.025683	0.092346	5.36682	27.9576	43.623	1.1679	0.826843	1.67951	1.98145	7.54715	103.991	144.236	98.9424	99.8244	60.7662	47.4583	78.004	97.6317	56.0767	204.858	194.945	159.02
1.10.7	10	4	64.8524	63.4371	8.81273	46.5213	79.8051	42.0976	40.8546	0.930171	2.5717	20.5952	51.4014	114.067	5.52566	20.4516	7.60591	0.355208	5.91356	103.506	145.469	102.162	101.737	63.0132	50.6956	86.5421	119.773	68.9581	221.093	213.992	180.505
1.10.7	10	5	16.0003	14.1881	0.128656	0.406537	6.054	0.215608	0.48657	0.009616	0.002932	0.081922	1.08851	0.638488	0.238144	0.107056	0.038949	153.785	10.9915	97.9529	126.439	89.0426	94.4525	54.6025	42.8722	81.6376	112.767	62.051	214.532	206.075	176.479
1.10.7	10	6	18.1807	21.8036	0.37437	5.52259	18.9686	6.60444	5.7191	0.030344	0.051198	2.02029	14.3972	31.82	113.797	3.77598	2.76811	0.66356	2.35534	62.188	94.6738	61.7736	133.044	53.3777	40.8496	134.931	136.017	73.3809	196.216	175.746	135.332
1.10.7	10	7	34.215	33.3039	0.52657	9.89616	32.0747	6.67704	9.76215	0.016574	0.017919	1.22092	18.708	33.8584	2.30195	1.40323	2.77876	6.21535	9.81527	88.2015	125.895	87.2881	105.346	56.7677	44.9847	96.7602	127.002	70.148	215.235	207.119	172.204
1.10.7	10	8	18.8274	13.9664	0.166396	0.788825	1.69029	0.248493	0.409757	0.005826	0.009886	0.188939	1.5901	3.11837	2.99781	0.180765	0.530573	17.8165	2.2768	30.5533	59.0087	36.0345	77.7053	23.9123	17.6086	75.2421	72.9952	34.7795	119.996	101.608	72.3124
1.10.7	10	9	44.615	44.7002	0.172384	4.8544	61.6562	13.7164	27.3974	0.624009	0.095235	1.99248	27.6588	48.2978	2.15965	11.6444	63.7476	4.27928	170.401	84.8324	123.202	85.1123	86.0795	50.3708	41.1977	76.1549	130.499	70.3285	222.196	217.851	187.725
1.10.7	10	10	10.2645	4.80432	0.016974	0.055055	0.09154	0.014465	0.025174	0.000262	0.012837	0.034053	0.054629	0.156653	0.238064	0.01546	0.057146	4.58784	0.209765	7.30167	23.2379	15.0831	16.6142	9.53277	8.44544	15.1181	14.7458	9.925	19.6113	16.9067	14.1837
1.10.7	100	1	7.40073	3.96398	0.0007116	0.007051	0.0095916	0.0012686	0.0023549	0.0002235	0.0068	0.0239101	0.0080445	0.0167491	0.0210052	0.0021177	0.0287059	0.131133	0.0070888	5.9514	16.0647	11.3167	14.5805	9.78154	8.81493	12.8519	11.9407	9.05962	14.8877	12.7736	11.1209
1.10.7	100	2	19.0389	27.5258	1.41803	22.0603	53.1464	14.8023	19.8102	0.131665	0.135836	7.49573	30.1673	84.2684	8.64389	10.5065	4.25871	0.32281	0.744626	42.7486	71.9335	41.7018	120.307	34.1456	25.7322	118.933	108.5	51.6006	180.729	147.978	106.079
1.10.7	100	3	13.0305	15.8809	0.0019628	0.710206	2.21236	0.152736	0.281272	0.0015558	0.0039973	0.0262818	3.02729	5.6862	6.39865	0.0383934	0.0478242	0.014984	0.004117	41.3705	72.2591	43.5205	135.314	43.4207	31.5951	142.8	122.477	62.2269	179.094	148.937	107.239
1.10.7	100	4	12.7748	11.2973	0.0325511	0.0859955	0.330961	0.0159879	0.02486	0.003785	0.0005148	0.0129296	0.237456	0.0899016	0.0251628	0.0117184	0.0557456	105.586	2.52718	52.7068	78.9374	51.8325	70.2646	28.2176	21.4445	58.2441	74.4876	37.1673	158.789	145.678	110.401
1.10.7	100	5	14.4077	23.8019	0.301424	6.1945	24.568	4.60595	6.61693	0.0016074	0.0081481	1.09595	16.5216	31.3634	14.4693	1.89164	0.626795	0.738097	0.357186	122.196	149.791	110.676	164.25	99.8988	78.014	162.552	167.985	105.099	224.693	213.721	181.193
1.10.7	100	6	17.3986	22.0641	0.0575556	3.45732	8.6738	0.877875	0.995946	0.0040079	0.0034254	0.0876384	9.63153	17.6145	2.14927	0.0719329	0.126343	0.247233	0.172387	57.4335	94.7789	62.8111	119.74	45.4687	35.82	119.302	119.515	63.7861	191.993	175.294	135.238
1.10.7	100	7	19.0882	18.5834	0.41677	1.81161	3.17916	0.300089	0.477342	0.0033375	0.0029474	0.163492	3.78985	4.28197	1.40812	0.079362	1.08019	5.36289	7.23364	37.1487	69.5117	44.5992	63.961	21.0557	16.8878	50.2005	71.9845	34.5338	152.221	142.74	105.865
1.10.7	100	8	9.49444	7.95241	0.0466728	0.0605308	0.004445	0.0107204	0.0335992	0.0211792	0.0011766	0.0200026	0.0247091	0.0005229	0.0001307	0.0001307	0.344228	228.761	22.2965	43.9886	66.3249	45.4204	80.5558	50.8074	40.5054	65.4757	72.0879	43.5061	67.9854	63.1269	50.3682
1.10.7	100	9	35.3368	37.1831	3.54287	39.2246	60.6346	31.8498	29.185	0.0763465	0.520186	11.7907	43.5872	103.446	2.34719	6.81328	8.00409	0.121777	4.50032	77.436	122.705	83.377	77.8936	42.3813	35.2843	66.1801	106.112	56.9626	212.364	205.759	168.04
1.10.7	100	10	246.302	241.167	1.40651	16.9367	52.5046	14.5146	24.5006	0.0109619	0.0235435	5.37134	31.7137	41.4235	1.42038	0.527487	2.1487	1.86801	7.60377	169.636	197.625	145.964	165.388	117.769	89.7344	127.845	122.614	80.163	229.879	221.717	194.551
1.10.7	100	11	17.9195	14.1239	0.0360416	0.145	3.93278	0.0219851	0.127288	0.0002419	0.0004838	0.0012901	0.448786	0.103045	0.201064	0.0654178	0.177144	27.7392	0.343618	97.9657	131.159	92.0248	75.4023	51.2814	40.899	64.9727	112.966	61.38	231.767	227.445	204.467
1.10.7	100	12	159.78	178.485	2.47968	24.808	52.1797	18.4347	23.7146	0.0203036	0.0333001	7.32839	36.7191	42.5317	0.845391	0.604632	2.05816	0.631677	7.78785	149.06	181.645	130.27	146.338	97.0978	73.6379	113.895	117.277	72.5017	224.874	215.711	184.822
1.10.7	100	13	16.2399	9.05853	0.119076	0.306617	0.511746	0.0847918	0.149262	0.000911	0.0272945	0.162769	0.301396	0.965926	1.4416	0.0916592	0.287013	2.3662	0.323978	11.5914	35.1759	21.0794	32.4126	10.8653	8.41648	29.203	30.3859	14.3038	43.1461	36.9336	27.215
1.10.7	100	14	17.7662	15.9284	0.379443	0.872633	13.8865	0.581331	1.30141	0.016471	0.0005536	0.209113	1.85309	1.13642	0.463653	0.276077	0.0745765	159.609	9.10159	121.551	150.265	109.089	105.218	66.8183	53.0976	92.9611	132.755	75.3276	233.46	229.125	209.553
1.10.7	100	15	22.304	23.8137	0.281955	1.99944	15.6672	0.453364	1.24508	0.0027516	0.0241528	0.0611463	8.84865	7.00267	1.72184	0.0406858	0.528868	4.66005	4.46138	77.1713	112.828	76.9901	91.2583	47.1472	36.8716	81.465	118.175	62.5006	205.387	198.642	159.705
1.10.7	100	16	107.59	116.069	9.11548	45.3299	69.7917	35.4053	35.164	0.0670649	0.863066	18.1154	50.2234	74.914	0.761816	3.62855	2.14097	0.14982	2.95473	128.009	166.364	118.243	122.492	80.1432	62.4729	96.9838	114.495	68.968	222.914	214.845	182.528
1.10.7	100	17	14.7618	22.058	0.0524996	3.08723	13.441	1.36036	2.11811	0.0022397	0.0025981	0.146121	10.8124	18.6388	4.92	0.229559	0.131309	0.529863	0.218091	87.6423	122.287	87.1498	147.485	74.2391	59.1935	148.122	148.746	88.083	211.853	198.084	161.398
1.10.7	100	18	16.0008	15.6389	0.268007	0.526281	6.06572	0.145195	0.250199	0.0024663	0.0065371	0.0408269	1.90837	0.852485	0.327623	0.0248356	0.029198	72.3325	3.45013	78.6482	109.967	75.2679	85.864	45.8641	35.7213	76.033	112.437	59.1662	210.862	202.899	166.075
1.10.7	100	19	21.5608	20.8329	0.343554	2.39001	4.41409	0.186515	0.256945	0.0023013	0.002067	0.0945182	6.01714	5.22182	1.41137	0.0281942	0.853847	3.81705	4.34158	51.0169	86.0265	56.5001	71.4758	29.0501	23.2255	58.0271	86.4616	43.2098	175.104	166.658	127.024
1.10.7	100	20	113.917	91.6367	0.673752	13.7515	63.8195	16.7579	29.1934	0.0944192	0.045164	3.33935	32.8952	54.9292	0.871316	6.65496	18.8297	0.681167	103.846	111.455	151.133	106.032	103.563	65.778	52.2031	88.1578	130.493	73.5674	226.373	221.527	192.961
1.10.7	100	21	108.444	50.2676	0.386864	6.53338	6.98119	0.985079	1.02083	0.0219134	0.0227618	0.271943	10.1184	11.1774	1.60535	0.0459918	1.04699	3.3036	4.17267	63.3263	102.316	67.5695	75.0905	33.6117	27.182	60.8303	81.5912	42.4726	172.386	161.477	124.044
1.10.7	100	22	40.9036	38.049	0.205208	13.1734	198.767	75.2847	116.665	42.1209	9.92054	29.836	54.3365	137.943	47.6626	142.091	33.8264	17.0556	154.176	82.1387	116.359	80.4333	103.586	60.6922	49.2246	95.9682	150.538	82.4302	228.232	222.648	192.821
1.10.7	100	23	22.5425	24.1304	0.56099	4.96111	19.931	8.98592	5.93933	0.0098039	0.0556819	2.15155	15.8089	30.8437	161.697	3.65334	3.74716	1.31925	4.02123	65.4151	99.822	66.5891	119.96	50.5986	39.5304	118.195	131.888	71.0152	197.568	182.354	143.461
1.10.7	100	24	246.879	135.195	0.410187	10.4797	15.7741	2.98904	3.53332	0.0241556	0.0264154	0.937947	16.8629	17.7256	0.786844	0.0430892	0.657515	0.630978	2.92112	98.7348	139.301	94.2519	97.0885	58.299	45.4323	72.2205	82.8171	48.3435	190.285	177.121	140.855
1.10.7	100	25	29.0724	29.6783	0.995811	4.06081	29.4278	2.44346	6.1533	0.0066949	0.0268	0.31585	14.323	15.4076	2.87906	0.59572	1.33569	3.90527	8.13215	94.1251	131.629	92.3987	100.998	59.2862	46.8087	93.0321	132.716	73.5488	216.924	211.309	176.063
1.10.7	100	26	8.79037	6.94474	0.0569017	0.0382633	0.0038373	0.0018638	0.0002193	0	0	0.0195154	0.0337682	0.0001096	0.0001096	0.0061397	0.102072	217.219	15.3461	8.94485	24.7595	16.8195	32.6821	17.4228	14.4433	27.5814	34.8459	19.045	25.5598	23.9959	20.9686
1.10.7	100	27	32.4659	41.7663	0.25403	3.63195	103.868	25.5718	51.3153	1.77145	0.0573795	3.47419	37.7146	74.2849	1.91324	39.9328	41.1154	1.62679	97.5016	86.7148	128.449	88.9503	83.4323	53.3501	44.5862	77.7526	146.952	79.6018	231.992	229.517	205.87
1.10.7	100	28	12.6245	13.72	0.0113137	0.416488	1.39367	0.105371	0.233002	0.0008653	0.0028555	0.0252234	1.907	3.78573	6.75873	0.049603	0.050901	0.0398252	0.002704	31.3349	60.0325	34.1452	116.606	32.2594	22.0176	124.916	103.652	48.7517	152.684	120.055	81.5338
1.10.7	100	29	249.083	167.774	0.279199	10.6863	24.2439	3.6532	6.29035	0.0203362	0.0210223	0.892068	19.6282	19.629	0.948578	0.0273119	0.668236	1.13521	4.41534	123.787	160.738	111.405	119.928	77.029	58.6557	90.1983	97.0814	58.6825	209.458	197.233	161.629
1.10.7	100	30	9.44008	3.57463	0	0.0138932	0.0309686	0.0097796	0.0114871	0	0.0015135	0.0002328	0.0014359	0.0159888	0.0041524	0	0.0001552	0.037566	7.76e-05	0.0244101	0.115531	0.0830487	0.0848727	0.0333747	0.033918	13.4311	12.2805	9.78958	0.214918	0.203392	0.233584
1.10.7	100	31	12.7693	13.0199	0.0457807	0.391157	1.4137	0.135958	0.28734	0.0008559	0.0037149	0.072568	1.45812	2.90634	4.43752	0.0806898	0.0811269	0.125433	0.0619514	24.8884	54.3222	31.154	94.6227	23.7924	16.5336	101.332	86.9842	39.7691	128.302	101.674	69.247
1.10.7	100	32	40.8212	38.7319	0.266926	7.4339	55.5498	13.0349	22.5583	0.121842	0.0127078	2.06391	26.0848	48.1833	3.61316	4.55654	16.2101	7.43274	202.952	85.8874	122.822	85.078	93.775	52.3491	42.3291	85.4516	132.324	71.6699	221.99	216.909	183.815
1.10.7	100	33	32.4836	36.5016	0.160539	6.01136	53.3923	8.80575	20.7153	0.0095583	0.0047322	0.84855	25.027	40.8224	2.00554	2.61949	14.5327	2.22474	82.9293	84.0576	124.817	86.5152	87.1242	50.1821	41.0084	80.1244	134.749	72.4164	223.933	220.12	189.628
1.10.7	100	34	21.5961	33.0347	2.91661	38.7994	80.9617	34.8416	37.2173	0.253963	1.02983	16.7042	45.2349	117.591	7.45821	24.6501	9.36029	0.278379	0.367973	79.0972	111.125	71.2827	137.229	60.8208	46.9677	134.03	139.063	75.834	217.652	198.527	156.766
1.10.7	100	35	16.1612	18.961	0.106657	1.25712	3.38664	0.263245	0.404509	0.0023803	0.0025942	0.0528737	4.51991	7.12193	2.52323	0.0480329	0.103474	0.430104	0.294937	39.8753	75.3581	48.1123	103.843	32.6578	25.8742	104.118	101.34	51.5731	165.718	146.721	109.782
1.10.7	100	36	36.1423	38.9227	1.85387	24.8769	60.5497	21.9158	25.9743	0.0749925	0.075572	5.56159	34.8249	73.669	3.18621	5.20799	4.29326	0.996683	7.6714	93.3266	135.562	94.8999	99.8402	57.2385	46.0947	90.2684	128.968	71.7299	220.502	214.624	180.067
1.10.7	100	37	233.488	103.351	4.01828	45.5406	73.9766	37.5772	37.6406	0.108175	0.858579	18.8456	49.9722	126.486	0.992892	12.4686	2.49266	0.103437	2.57136	114.342	158.279	111.404	95.4992	66.0709	53.1197	76.0848	106.008	62.4262	220.306	213.424	180.071
1.10.7	100	38	160.573	69.5794	0.401056	11.3817	20.9466	3.18526	4.47895	0.0249367	0.0293285	0.445503	16.7391	23.1047	1.82551	0.0707348	1.49888	2.9277	6.5599	87.9458	127.611	86.4045	89.6831	49.7267	39.1511	74.4024	101.362	55.2214	200.152	191.032	152.68
1.10.7	100	39	17.5587	28.716	0.437516	19.6077	59.7888	17.4641	22.8499	0.0156609	0.057404	5.29744	31.2725	74.5073	6.06212	8.02317	2.35566	0.401071	0.559602	106.851	141.256	100.909	140.843	78.4096	61.4733	135.171	153.592	90.3291	224.594	215.068	180.94
1.10.7	100	40	5.17718	3.26491	0.0101222	0.0505296	0.111385	0.0118977	0.0203465	6.12e-05	0.0560601	0.0377747	0.0501418	0.1191	0.245811	0.0134895	0.115712	3.90666	0.0484072	3.9721	13.5683	9.19253	11.6367	6.42999	5.79676	3.49266	3.77021	2.23126	13.3358	11.6283	10.592
1.10.7	100	41	149.481	131.471	0.156361	6.22372	72.5785	17.7607	35.2591	0.296775	0.0593371	2.73423	34.1634	53.5374	0.786885	12.3877	102.213	1.15788	194.469	125.607	162.678	115.443	111.739	75.7544	59.9178	90.3845	134.013	77.6065	231.399	227.789	203.691
1.10.7	100	42	186.772	38.5898	0.14349	1.84891	1.67838	0.33683	0.453662	0.0289674	0.0160716	0.13733	1.54172	1.55644	0.64373	0.0427293	0.963045	1.77885	1.02069	33.2656	64.3464	42.5958	47.1331	24.4596	20.3817	33.4627	40.017	23.7008	81.1722	73.0399	56.785
1.10.7	100	43	17.8371	16.0368	0.16808	0.665668	9.38229	0.239722	0.583793	0.002759	0.0062306	0.0757172	1.80972	1.25847	0.221506	0.0792253	0.0588343	96.7114	2.90228	99.3197	130.682	91.9204	91.7731	55.3196	43.6664	81.3817	122.424	66.7493	228.197	222.466	195.179
1.10.7	100	44	229.564	214.323	0.0508415	5.95072	65.1999	13.473	31.0238	0.076237	0.025849	1.93888	32.2359	42.2905	0.412224	5.37413	42.3274	0.114885	120.008	150.562	183.332	132.718	136.52	94.2817	72.7816	103.776	130.084	78.8998	232.017	227.569	204.613
1.10.7	100	45	24.6589	35.4771	2.99876	40.6882	89.7734	42.6552	43.9719	0.375581	1.84304	18.6534	48.6863	122.421	2.87169	28.9444	9.09273	0.281357	1.71071	104.686	147.28	104.944	104.988	64.2225	52.2535	92.7813	136.304	78.3377	227.274	222.093	190.545
1.10.7	100	46	24.1557	15.717	0.125085	0.88082	0.930256	0.080158	0.177752	0.0030324	0.0069824	0.20644	1.03942	1.65367	0.836093	0.075809	0.944181	9.23852	1.93832	62.3923	92.6555	62.4245	77.7042	38.713	30.4895	64.4613	73.9014	41.113	134.482	123.062	93.3944
1.10.7	100	47	226.887	73.0352	0.253564	6.16158	5.24684	0.695055	0.733544	0.0287489	0.0303487	0.204771	7.73773	9.31313	0.751659	0.0386769	1.12535	1.21357	3.5156	72.3544	111.955	74.9741	76.2456	41.0376	33.2344	58.6749	75.2842	42.0347	165.404	153.688	119.112
1.10.7	100	48	36.318	39.7932	8.66126	54.1582	85.7364	50.9591	44.5258	0.240497	4.00688	25.0501	56.986	155.469	2.99834	28.7878	10.6542	0.0304264	1.9038	88.3052	134.835	93.748	78.9914	48.7317	41.1698	66.7692	112.367	62.4201	220.781	215.459	181.233
1.10.7	100	49	162.52	76.7394	1.60974	9.56277	28.8974	4.26449	6.1847	0.0191533	0.0226912	1.09735	11.2769	6.67622	3.56752	0.570819	0.397707	111.117	14.1652	115.864	149.288	106.174	116.538	71.7815	56.4746	98.5196	128.354	74.2852	227.17	220.688	194.056
1.10.7	100	50	23.2466	20.0808	0.403874	1.49452	30.7788	0.995474	3.59641	0.019001	0.0013048	0.244689	2.88555	2.16844	0.130601	0.608318	0.12261	74.2181	2.36118	121.565	154.916	113.074	101.081	68.8583	55.3663	90.8881	145.232	82.6078	236.401	234.301	222.586
1.10.7	100	51	240.237	208.525	9.91003	45.4795	90.7619	44.8858	50.1699	0.719744	1.56539	22.7477	53.1562	93.4457	1.43265	11.0676	1.32023	0.992296	2.29079	163.16	194.866	145.191	149.574	107.981	83.8271	114.035	121.51	78.696	230.103	223.447	197.096
1.10.7	100	52	26.8056	25.9751	0.0262003	1.54039	21.3248	3.13261	6.11632	0.0489544	0.0044847	0.262805	13.3168	14.3733	1.97536	0.832271	20.6961	18.1229	227.374	60.7397	92.0736	61.931	78.1279	34.9169	28.0684	64.2044	102.399	52.0874	195.544	188.116	148.791
1.10.7	100	53	12.1063	10.5841	0.140427	0.127028	0.630077	0.0270483	0.0375441	0.0040655	0.0002489	0.0136901	0.212114	0.043352	0.112632	0.0185439	0.0273387	225.604	22.0519	93.7789	118.883	82.257	94.1508	52.7656	40.9077	78.1582	95.5976	53.274	198.93	184.362	149.133
1.10.7	100	54	115.398	98.2556	20.5079	63.872	95.8187	60.0926	55.1029	1.45623	7.27859	32.4639	65.744	138.245	1.10363	27.6518	6.94985	0.0617264	3.36643	118.534	161.743	115.393	103.422	70.9377	56.9333	84.0608	114.728	68.3347	224.436	218.058	186.519
1.10.7	100	55	14.0765	12.3249	0.0880048	0.297268	3.19335	0.208314	0.298872	0.0095606	0.0004157	0.204454	0.342696	0.300119	0.163183	0.205582	0.0295131	241.395	34.5621	154.002	174.911	133.337	126.252	89.72	72.139	106.121	129.196	80.3732	229.573	222.132	203.318
1.10.7	100	56	25.3789	11.1487	0.0617818	0.305632	0.452986	0.0892135	0.141609	0.0027108	0.0311944	0.129066	0.347993	0.741827	0.614379	0.0458812	0.790217	7.56223	0.595485	33.1193	60.7188	40.8012	48.6751	24.26	20.239	38.6614	44.4441	26.0397	73.0254	67.9965	52.8841
1.10.7	100	57	93.1179	85.1141	0.634225	15.1454	36.4046	9.13592	12.3919	0.0227597	0.0268087	1.60842	25.2546	31.6973	2.23395	0.258199	1.67344	1.64759	6.9678	108.486	147.316	102.663	113.656	67.2018	52.0934	97.1206	120.242	68.433	215.873	207.691	172.755
1.10.7	100	58	10.9393	8.67547	0.0221466	0.0662397	0.0644387	0.0308185	0.114869	0.060503	0	0.0200787	0.0727103	0.0019345	0.0004669	0.003869	0.0390901	212.429	15.949	73.9596	96.6923	65.8937	82.4904	46.44	35.9382	66.8585	76.3877	43.0537	147.929	132.029	102.115
1.10.7	100	59	37.9585	34.0639	1.92689	20.1473	29.1379	7.58959	8.35324	0.0169355	0.0209316	1.60154	25.2917	50.8998	2.06774	0.512527	6.00841	0.29818	4.34186	61.314	102.867	67.8229	74.3278	31.3412	25.9998	61.1978	93.4966	47.194	192.043	183.262	143.001
1.10.7	100	60	117.439	113.293	13.6733	48.467	52.5951	33.127	28.0724	0.0238354	0.721938	18.9602	51.1058	59.893	0.092131	0.288039	0.52906	0.0341569	0.699862	110.645	152.67	104.419	106.184	64.902	50.1649	76.5126	86.6426	51.4203	206.889	195.579	159.763
1.10.7	100	61	208.949	118.549	0.111836	7.03432	38.0783	8.53839	15.2705	0.0433349	0.0251665	1.24709	22.011	30.7908	1.6764	1.36976	14.055	2.25207	161.699	107.092	143.98	99.4807	104.806	63.5076	49.7459	84.3159	115.028	64.8987	216.75	209.101	175.467
1.10.7	100	62	9.37541	6.41133	0.0252853	0.044302	0.0129596	7.04e-05	0.0007043	7.04e-05	7.04e-05	0.0115509	0.0440203	0.0114805	0.12537	0.0006339	0.105367	103.373	0.315819	7.9888	22.1197	14.8312	21.571	9.2008	8.03233	15.8419	20.5419	10.785	24.5013	22.8992	19.785
1.10.7	100	63	79.6726	74.0884	10.8179	49.9208	70.7403	41.0956	37.873	0.0902526	1.51896	20.0105	52.618	98.5759	0.530805	8.25825	3.76	0.0634479	5.09345	100.901	145.842	101.744	93.0154	58.775	47.4893	76.6971	108.817	62.3177	218.553	211.683	177.072
1.10.7	100	64	27.6955	37.0692	0.248538	2.25144	63.3627	11.0724	27.9789	0.0294833	0.0110744	0.612432	27.7917	42.5347	0.105043	8.77376	105.763	0.284521	122.643	84.6167	125.745	87.1453	78.6963	49.6983	41.2944	70.6582	136.994	73.7071	228.214	225.282	198.662
1.10.7	100	65	157.486	145.277	18.6528	54.4909	65.6057	40.9447	36.3423	0.0512048	1.29136	25.2681	57.3809	69.5202	0.134747	1.09902	0.566881	0.0382547	0.589525	129.285	167.97	117.618	121.857	79.3552	60.998	88.8338	95.3501	58.7443	215.699	204.957	171.079
1.10.7	100	66	83.9752	51.1732	0.247736	7.22479	17.6703	1.55281	2.72593	0.0203006	0.0193046	0.12309	13.9828	15.6848	1.29468	0.0298624	1.10746	3.57157	5.48155	83.5108	123.463	83.9782	90.006	47.5197	37.4728	77.5066	107.307	57.7043	200.591	192.649	154.255
1.10.7	100	67	30.5902	32.1784	0.933797	15.0649	40.0099	9.36697	13.1185	0.026578	0.0076196	1.02139	25.1614	50.1322	3.10005	0.869015	4.18199	0.99941	7.17348	75.0183	116.281	78.7383	86.6844	43.0401	34.5771	76.7405	116.434	61.0156	209.095	202.776	164.395
1.10.7	100	68	92.2611	59.5895	1.37781	28.154	44.2773	16.9465	18.3451	0.0260915	0.0504535	4.49884	33.7507	67.6682	1.18956	0.747332	4.78332	0.188737	6.53816	83.9692	128.266	87.1899	83.0592	45.3803	37.0158	69.8985	103.616	56.0407	207.172	199.739	161.933
1.10.7	100	69	32.2386	40.5734	0.0653805	4.67454	78.8145	20.1232	37.9133	0.441256	0.0139335	3.29528	34.3161	67.9824	2.08533	19.3586	99.1044	1.34261	216.778	85.7834	125.318	86.8399	80.9747	50.7088	42.417	73.0682	138.282	74.8495	229.414	226.675	200.459
1.10.7	100	70	13.6426	18.6286	0.0018972	1.60691	5.48338	0.464747	0.686965	0.0013996	0.0037633	0.064162	6.23914	11.713	6.40438	0.0995553	0.0940814	0.0398097	0.0164526	59.4157	92.0458	60.1197	150.959	59.5459	45.8537	157.106	141.392	78.2662	200.764	177.13	136.222
1.10.7	100	71	14.2937	12.4334	0.0764331	0.215952	3.4778	0.0996063	0.160548	0.0035208	0.000192	0.0254457	0.514291	0.263771	0.433601	0.0504753	0.0156515	231.318	24.0017	113.029	140.572	100.028	102.21	59.9499	47.2033	86.9845	116.085	64.95	228.154	220.643	194.236
1.10.7	100	72	32.6209	29.5324	0.0692464	2.89698	23.2281	2.03473	5.59204	0.0102458	0.0038743	0.188368	13.9139	19.9368	1.67186	0.353374	9.14472	7.74047	107.204	66.2666	102.618	68.6305	81.9644	36.7241	29.5057	69.6801	106.259	54.116	199.826	192.224	153.674
1.10.7	100	73	11.9008	10.5244	0.158588	0.43565	0.819997	0.103518	0.194022	0.0006319	0.018864	0.160531	0.590634	1.66014	3.72299	0.0931495	0.173684	1.16935	0.402532	12.5525	38.4716	20.9363	53.3816	11.3299	7.3242	54.4415	50.2126	20.3653	71.9794	57.2237	38.3091
1.10.7	100	74	158.42	72.25	2.6168	38.661	62.2274	30.3657	30.5195	0.0429598	0.330403	12.646	43.4641	105.722	1.46624	6.45449	3.12289	0.0966978	3.41681	99.9157	144.661	100.283	87.7309	55.9433	45.3195	72.9212	106.625	60.5048	216.057	209.314	173.997
1.10.7	100	75	20.2053	22.2724	0.430504	2.64201	11.8067	0.469189	0.798291	0.0016234	0.0060498	0.0598454	8.80365	6.57657	2.10865	0.0530741	0.650238	5.64245	4.22836	58.5743	94.6691	63.359	77.2181	34.9942	28.072	65.8413	104.24	53.1227	195.497	189.042	149.147
1.10.7	100	76	143.269	134.904	0.768429	15.4736	31.2345	8.0067	10.7124	0.019086	0.0233174	2.16854	25.7881	24.6517	1.98158	0.0608882	1.17866	1.46802	6.11251	122.279	158.101	109.344	124.651	75.1839	56.8811	97.7466	107.718	62.9831	214.574	203.797	168.447
1.10.7	100	77	11.1786	8.47888	0.046544	0.0953274	0.0964774	0.0038131	0.0099262	0.0002421	0.0001816	0.0415809	0.152645	0.0582859	0.0211839	0.0023605	0.131703	114.979	1.28441	39.3224	61.7699	40.0584	56.629	24.3245	18.5758	45.1873	52.3733	26.798	101.409	90.2334	67.5171
1.10.7	100	78	231.724	96.5078	1.18486	28.9504	46.4858	17.792	19.3095	0.0252722	0.0480871	6.01458	34.9852	73.429	1.14814	0.69748	2.35793	0.130071	3.33952	99.6765	143.485	98.5358	89.4716	56.061	45.117	70.5484	97.5291	55.4794	208.491	200.147	163.684
1.10.7	100	79	9.74477	4.50573	0.0815408	0.232893	0.152045	0.0261848	0.0400779	0	0.0002164	0.184592	0.124475	0.776412	0.304177	0.0760009	0.0499459	0.33733	0.0506817	0.265094	1.35261	0.815668	2.33915	1.05445	1.05423	13.0888	13.0562	9.88552	17.6862	15.529	14.2157
1.10.7	100	80	150.068	156.701	19.0363	58.6141	97.678	53.5106	53.7016	1.73622	4.63994	29.3554	62.9259	101.468	0.609722	15.8715	2.86181	0.0429609	1.9241	150.34	185.244	135.729	136.987	95.904	74.7811	105.346	118.462	74.6011	228.475	221.538	193.221
1.10.7	100	81	248.554	142.015	2.90203	34.6135	52.2022	24.8077	25.2608	0.0179637	0.0975093	11.0795	40.9584	68.4039	0.392394	0.363917	0.627489	0.0563325	0.710181	121.207	162.019	112.264	110.321	72.5727	56.0609	80.2889	90.898	54.9455	211.045	200.233	165.234
1.10.7	100	82	29.7126	43.1227	16.1528	65.454	123.248	70.9002	67.2733	5.99066	11.9112	37.4765	67.5284	176.465	6.62632	58.8163	18.8323	0.418981	2.80324	116.992	158.827	115.032	106.194	72.4711	59.1358	93.4034	141.21	84.1278	230.582	225.995	197.723
1.10.7	100	83	10.6315	4.42017	0.0017749	0.0102228	0.0361953	0.0042969	0.0101441	5.9e-05	0.0114529	0.0041537	0.0145337	0.0380293	0.0524029	0.0069902	0.0154914	0.135623	0.0040273	7.93122	29.613	18.7304	15.6114	10.2224	9.28614	14.0064	13.3726	9.97145	18.397	15.905	13.8969
1.10.7	100	84	18.7565	26.8901	0.117249	15.8578	38.3645	9.99452	11.6592	0.0053491	0.0226639	2.03278	25.672	64.2056	3.22986	1.82292	1.24309	0.10039	0.123992	70.6202	108.327	71.4677	130.323	54.0734	41.8673	128.606	132.874	71.5655	210.646	194.814	153.999
1.10.7	100	85	234.481	86.6462	0.334938	9.79772	21.8014	1.99011	4.06657	0.0254008	0.0313401	0.200323	14.9966	19.2013	1.49089	0.0390958	0.948247	2.59624	5.80331	106.589	144.576	99.5644	100.492	62.1148	48.146	82.0296	106.617	60.8415	206.817	197.861	160.851
1.10.7	100	86	27.6046	36.9992	0.436993	3.03111	64.7129	13.748	29.8705	0.276345	0.0991683	1.5809	28.927	49.579	0.0852195	12.7643	210.722	1.03432	206.553	83.7499	122.689	84.6823	79.9157	49.3228	40.7135	69.3364	130.333	70.2349	225.145	221.166	193.096
1.10.7	100	87	249.583	187.093	2.73693	31.7743	58.8781	25.8119	29.7822	0.0214563	0.0657823	11.2354	40.0655	61.9079	1.07948	0.813472	1.18254	0.356149	2.22781	141.429	177.686	127.042	131.762	89.6046	68.8583	98.4337	106.233	66.1754	221.545	212.134	180.295
1.10.7	100	88	14.9527	14.459	0.0978417	0.347679	5.44727	0.188123	0.400492	0.0054191	0.0042273	0.0846571	1.34584	0.856478	0.213281	0.0902624	0.025345	150.626	8.54424	89.3541	119.304	82.3937	92.6053	49.6685	38.7169	81.2105	113.738	60.9205	218.273	209.746	176.062
1.10.7	100	89	249.412	215.204	0.440343	10.1832	31.2118	5.24671	10.5031	0.0153714	0.0219158	1.35657	22.2796	23.9993	2.09756	0.0184223	0.923399	1.59361	4.98158	146.366	179.047	127.437	143.373	96.3984	73.0871	109.06	108.588	68.2313	220.723	209.514	176.679
1.10.7	100	90	19.6415	33.1134	2.821	36.8829	93.5485	38.4	44.8084	0.406727	1.9175	19.0303	46.013	120.368	13.0079	34.2506	9.46405	0.463747	0.959689	128.586	159.107	116.959	143.86	91.5318	71.7846	134.997	163.336	100.057	230.268	222.939	193.734
1.10.7	100	91	12.281	11.5649	0.0515958	0.36209	1.16262	0.138173	0.289567	0.0008099	0.0168119	0.0958364	0.965172	2.2805	6.32052	0.122346	0.105468	0.229587	0.102929	19.043	47.2082	26.3419	76.1725	17.8198	11.9095	82.2576	71.6078	31.1348	99.2324	77.6978	51.8213
1.10.7	100	92	237.081	125.452	1.08885	17.9045	50.9567	13.6945	20.6215	0.0291607	0.0325421	3.48706	28.2158	42.6135	3.98694	1.45807	2.65459	4.31628	13.8933	133.437	168.067	119.826	126.643	83.5629	64.4857	102.995	124.951	74.7355	224.617	217.454	186.594
1.10.7	100	93	17.4551	15.1288	0.468359	1.0967	1.5798	0.241093	0.331475	0.0083069	0.0033393	0.246336	1.50493	2.36456	1.18766	0.114806	1.14974	6.574	4.42106	28.441	56.9313	35.7023	56.9627	17.5069	13.5697	44.222	55.962	26.485	118.243	107.791	78.3874
1.10.7	100	94	13.5534	12.854	0.0599718	0.107968	1.37784	0.0398522	0.0966899	0.0024569	0.0004643	0.0303148	0.479097	0.190149	0.0651951	0.0186299	0.0151864	130.843	5.14343	73.0035	101.035	68.117	83.7376	40.2132	30.7696	71.8134	95.7639	49.7364	193.511	181.665	143.42
1.10.7	100	95	14.3338	14.0657	0.27274	0.292658	1.70372	0.0487905	0.0847619	0.0013279	0.0006469	0.0194923	0.811341	0.215556	0.143001	0.0117976	0.0294002	66.4681	2.63855	64.7725	94.0962	63.0538	77.7402	36.1609	27.8705	66.5813	94.6676	48.271	186.121	176.244	137.148
1.10.7	100	96	29.9612	38.1174	28.9483	73.8164	81.5942	60.3505	34.2693	1.64913	3.87546	57.1484	55.2004	243.206	147.627	100.308	30.9419	0.438302	11.4998	73.7988	113.125	78.8216	78.6904	50.2533	42.2797	64.6809	112.957	63.3122	219.053	212.861	179.178
1.10.7	100	97	9.79487	3.16726	0	0.0556213	0.171203	0.0682446	0.0828402	0	0	0.0035503	0.0358974	0.100986	0.042998	0	0	1.74043	0.0003945	66.5396	85.2083	74.9972	17.8994	11.9467	10.7696	13.2497	13.6028	10.0982	15.7377	14.559	12.6836
1.10.7	100	98	0.0057631	0.0111288	0	0	0	0	0	0	0	0	0.0877385	0	0	0.0028816	0.0042727	4.81578	0.0023847	115.661	144.861	103.997	88.7744	61.1938	48.6039	0.419416	0.625894	0.356618	233.043	228.422	207.806
1.10.7	100	99	246.908	153.475	7.71967	48.2446	80.6192	43.1771	43.8503	0.274749	1.62472	22.6632	53.3641	113.597	0.746482	10.403	1.35322	0.119498	1.29864	136.87	175.951	126.169	120.259	83.9817	65.5611	91.2847	108.09	66.5371	223.94	216.272	185.247
1.10.7	100	100	28.5022	21.9565	0.215672	1.60552	3.66621	0.0776749	0.138869	0.0039902	0.0027328	0.0953626	4.3453	4.72758	0.817859	0.0161453	0.767964	4.29737	3.07835	78.5612	112.562	75.5073	88.6881	44.4455	34.202	76.1164	99.2253	52.6516	183.552	173.455	134.072
1.10.7	1000	1	13.5909	13.8651	0.068052	0.102078	1.29157	0.013855	0.044825	0.000611	0.000611	0.059495	0.512836	0.125509	0.212714	0.001019	0.000407	160.319	10.382	76.3449	105.013	70.9197	98.8356	49.2097	37.4307	87.2969	107.372	57.0754	197.933	185.438	145.946
1.10.7	1000	2	18.2283	26.9753	2.12425	23.247	73.4484	19.2552	29.6138	0.464072	0.24476	8.7747	31.3323	76.6804	5.85329	15.4573	5.72156	1.19611	3.46632	36.2635	62.256	35.6737	95.5771	21.1969	16.7994	86.9723	83.2455	36.1924	158.258	126.345	89.3496
1.10.7	1000	3	13.3392	15.14	0.081011	0.24441	0.878225	0.023564	0.04644	0.000516	0.000688	0.005332	1.51634	1.7248	1.03629	0.005504	0.03784	0.356897	0.192466	26.7927	60.1075	35.5468	85.9047	20.2778	14.4948	84.2721	81.4751	36.9157	141.756	121.368	85.623
1.10.7	1000	4	8.12094	4.2884	0	0.002573	0.000198	0	0	0.000198	0	0.000396	0	0.022169	0	0	0	0.074228	0	5.26762	12.7749	11.1548	14.9951	9.95131	8.83472	14.2652	13.2924	10.3434	17.7314	15.4952	13.4054
1.10.7	1000	5	25.5074	25.3863	0.612827	14.44	19.6366	2.83462	1.52969	0.000594	0.000594	0.197447	18.6303	13.9106	2.50594	0.44715	3.58996	0.168052	0.277613	64.717	103.271	70.44	62.8174	40.7108	33.3809	47.8302	87.0288	48.1713	198.232	191.479	151.996
1.10.7	1000	6	32.6035	41.2428	0.044981	4.26035	124.593	34.8823	64.7015	4.08311	0.07179	6.11498	41.6086	88.4141	0.952041	58.0932	67.9458	0.653858	162.113	86.3533	127.297	87.7575	84.4918	54.3131	45.1126	78.5645	147.137	79.3721	232.715	230.256	206.438
1.10.7	1000	7	32.8556	35.6628	0.000604	5.29607	179.372	57.2224	97.994	27.4326	2.49486	16.5323	46.4109	112.26	23.5293	112.639	24.8665	8.54381	79.3015	77.623	113.682	77.8894	93.7039	53.9994	44.3335	84.7366	142.529	76.0296	227.428	221.758	192.031
1.10.7	1000	8	17.8541	20.7381	0.039249	2.26792	11.1237	1.30546	3.17833	0.000853	0.116041	0.678328	7.77986	21.7978	3.29181	1.88823	0.193686	1.4087	0.078498	56.4488	99.0546	77.6305	92.0623	51.4531	51.0794	106.644	121.272	78.7807	95.8063	107.532	98.9104
1.10.7	1000	9	13.3413	20.2759	0.016567	0.918931	5.05456	0.21427	0.246079	0.000884	0.003313	0.018776	6.84736	5.64944	1.66424	0.014358	0.016567	0.210294	0.187541	55.6954	98.1951	70.6373	121.74	49.1224	42.9172	121.738	128.601	74.452	199.44	189.477	155.731
1.10.7	1000	10	25.5554	39.5856	0.003352	3.76897	85.1137	21.3021	40.819	0.259995	0.003591	2.99665	37.2047	79.8377	0.062724	24.6177	233.161	0.375628	228.208	85.0041	125.965	86.5054	78.0845	49.8963	41.6926	70.525	140.789	75.8279	231.395	229.083	204.56
1.10.7	1000	11	253.166	202.236	0.242049	27.1438	52.7818	20.0592	24.7963	0.018007	0.033209	6.32811	36.029	72.514	0.478485	0.5	2.56057	0.057063	1.72194	124.685	167.548	119.732	109.159	75.6773	61.4516	82.3604	101.571	62.46	215.885	207.288	174.702
1.10.7	1000	12	242.248	143.971	1.34984	9.46336	15.8318	4.17957	5.31992	0.024768	0.035088	1.86068	11.8287	15.5986	4.89474	0.576883	1.43653	0.664603	1.70485	41.5903	76.5738	51.1465	73.1383	39.4345	33.7368	56.8246	66.7358	40.7699	92.4448	81.742	64.3375
1.10.7	1000	13	13.7804	11.9023	0.073951	0.353201	1.13024	0.105408	0.261038	0.001104	0.012693	0.049669	0.568433	1.73786	0.842715	0.229029	0.027042	0.374724	0.021523	3.65342	30.7953	17.5105	21.9868	5.18212	5.11203	30.8885	41.4487	20.1766	22.2323	23.3758	18.9437
1.10.7	1000	14	22.5408	26.4904	0.046163	14.6414	26.8664	5.32396	6.28744	0.004719	0.008207	0.412187	22.9023	57.6401	1.0952	0.129052	3.78478	0.089454	2.89783	59.6455	100.413	65.6005	81.7823	32.4054	26.2128	69.8098	99.4233	49.738	194.812	185.662	144.637
1.10.7	1000	15	129.839	88.9109	4.42703	38.613	74.9384	38.0951	42.3044	0.523923	0.319378	14.1728	46.6711	100.957	0.601675	9.5311	3.51017	0.029904	117.194	116.631	157.089	110.318	111.033	68.6447	53.9683	93.4306	121.835	69.9318	223.919	217.447	185.528
1.10.7	1000	16	10.5755	3.63553	0	0	0	0	0	0	0	0	0	0	0	0.000407	0	0.001425	0	6.28775	30.766	20.2298	14.1418	9.02523	10.0305	14.0857	10.1416	9.27025	17.7389	13.5509	14.1913
1.10.7	1000	17	0	0.004535	0	0	0	0	0	0	0	0	0.040503	0	0	0.000309	0.002886	3.78646	0.001855	115.878	145.216	104.212	88.5901	61.1057	48.5294	0.290116	0.443574	0.252808	234.285	229.857	209.488
1.10.7	1000	18	146.513	46.8144	0.071538	3.47231	1.75872	0.141026	0.14641	0.024872	0.025385	0.037692	4.6882	4.79385	0.63641	0.019487	0.604615	3.17692	2.92333	62.3321	99.4508	65.3236	71.8867	33.6636	26.9262	55.7682	69.9026	37.4385	154.213	141.629	106.942
1.10.7	1000	19	11.3837	9.62428	0.01561	0.122912	0.197031	0.007423	0.032638	0.000437	0.001747	0.019758	0.171706	0.594913	0.799913	0.00513	0.020631	0.070735	0.01692	10.1769	37.2285	19.6964	51.6876	10.3745	6.16865	55.1742	50.1405	19.6264	69.0031	54.749	35.7029
1.10.7	1000	20	76.0813	50.6268	0.331854	12.9078	37.8552	6.29805	11.5543	0.018948	0.014851	0.343121	22.1852	36.6649	1.52663	0.071868	1.67634	0.449471	3.91379	92.449	132.983	91.9507	94.6673	53.6471	42.3076	84.2641	122.689	66.5009	212.562	206.715	170.121
1.10.7	1000	21	33.9986	36.9744	0.479134	25.0518	51.0919	18.2659	22.5203	0.007087	0.004528	3.36693	34.0711	77.8421	0.321654	0.779528	5.95079	0.127165	61.1281	76.1646	119.446	80.4752	84.7967	40.9785	33.2805	73.6075	111.241	57.947	212.823	206.209	168.729
1.10.7	1000	22	19.7888	14.675	0.000409	0.002451	2.8903	0.001226	0.004903	0.000409	0.001021	0.001226	0.035546	0.120735	0.036568	0.001226	0.004903	12.1395	0.008989	112.21	146.011	104.47	81.742	61.001	49.1028	71.2558	124.76	70.0031	236.571	234.402	220.753
1.10.7	1000	23	33.8384	36.4095	0.251799	17.3121	54.5224	16.8019	23.2872	0.011068	0.003874	2.22385	31.2869	76.6992	0.659657	1.65329	4.05479	0.304372	160.864	82.834	123.687	84.3218	93.13	45.7778	36.9975	81.9496	118.492	62.7385	216.927	210.261	174.155
1.10.7	1000	24	100.134	56.4832	0.300208	21.9235	49.2548	16.5983	21.2349	0.022842	0.023435	3.06081	31.5779	70.008	0.793236	0.822605	4.76713	0.033225	65.989	86.2625	129.434	87.989	88.3426	46.7048	37.7158	76.6752	113.286	60.3883	212.918	206.188	169.624
1.10.7	1000	25	10.1803	8.06283	0.046399	0.057999	0.078782	0.043016	0.081924	0.028758	0	0.030449	0.010875	0	0.000483	0.000242	0.005558	244.996	25.4178	73.3509	99.47	67.622	80.3557	45.6936	35.2832	64.5814	75.5899	42.7414	157.868	141.785	110.06
1.10.7	1000	26	26.8127	27.1853	0.574244	5.35874	24.3482	9.23128	5.76347	0.015769	0.018397	2.12221	20.2628	40.3009	97.929	2.87911	5.69382	1.40145	9.02891	37.8213	71.6288	45.9954	70.2753	23.2674	19.2438	53.4212	94.7043	44.7247	180.057	173.411	131.708
1.10.7	1000	27	72.1865	81.9131	13.2237	58.396	99.1538	57.2599	54.9338	0.533333	6.57228	29.604	61.7401	130.033	1.21323	31.7443	11.206	0.0402	3.45593	125.867	165.679	120.713	115.356	79.9708	63.8462	97.4549	131.524	79.3908	229.381	223.762	194.804
1.10.7	1000	28	14.8032	13.263	0.03037	0.120494	0.939506	0.024444	0.02963	0	0.000494	0.004691	0.52	0.078519	0.012593	0.001728	0.008642	69.5343	1.75457	51.12	80.3644	53.0812	59.7706	21.8763	17.482	48.3509	77.5622	37.3432	173.348	164.172	126.618
1.10.7	1000	29	155.502	126.922	6.11409	41.5332	46.7284	28.6464	24.6938	0.011896	0.037671	14.4342	44.259	45.8208	0.020908	0.034066	0.233057	0.011896	0.218637	119.128	160.376	110.027	112.477	70.2574	53.5094	79.4537	85.2967	51.4028	208.16	196.56	160.818
1.10.7	1000	30	21.9221	27.5552	0.600257	8.42658	38.9566	6.24959	10.47	0.004595	0.002757	0.772652	21.0246	38.1996	1.94652	0.503768	0.843044	0.485021	1.61092	98.8976	136.251	96.4054	111.813	64.2079	50.6881	103.399	136.574	77.4442	218.161	211.439	175.304
1.10.7	1000	31	61.6121	49.4983	3.04907	47.5089	82.7941	45.1691	43.1866	0.018659	1.84474	20.2412	52.3884	143.766	0.71965	24.2276	7.04538	0.036397	2.84128	100.563	146.39	102.944	88.7542	58.279	47.7784	76.6768	119.154	68.0329	223.83	218.531	185.304
1.10.7	1000	32	15.7479	14.9374	0.080991	0.288558	3.62316	0.02644	0.015955	0.000912	0.00076	0.001064	0.861723	0.112445	0.004862	0.00076	0.004559	61.3427	0.889379	77.2428	109.426	75.0296	77.2097	42.1032	33.1235	68.0941	108.3	56.4645	211.089	203.812	167.181
1.10.7	1000	33	23.7321	30.6969	0.383135	1.60037	37.8726	3.08616	12.8292	0.004583	0.001833	0.130767	18.0828	19.48	0.153071	0.583562	100.54	0.992362	104.867	74.7262	113.836	77.8949	77.2789	42.4339	35.1598	66.8543	123.656	64.8255	219.634	215.388	182.668
1.10.7	1000	34	16.8485	20.0067	0.280374	1.48999	27.358	0.595461	1.58723	0.001335	0.018914	0.204272	6.62728	6.06431	0.567201	0.039163	0.088785	102.165	6.9308	82.1923	117.426	81.0138	103.309	55.3892	43.3963	95.7886	137.664	74.1146	226	220.773	189.987
1.10.7	1000	35	13.9974	18.0587	0.189197	0.856816	3.89811	0.074164	0.05673	0.000429	0	0.091598	4.27508	1.41455	1.87682	0.007145	0.074164	4.82181	1.6509	45.6552	80.2395	54.154	77.5209	34.4458	27.7619	66.8462	104.176	53.6988	187.721	182.437	142.694
1.10.7	1000	36	7.81192	3.99984	0	0	0.000164	0	0	0.004928	0	0	0.000657	0	0.004599	0	0.048127	0.045171	0.00115	6.49015	15.2329	12.0476	16.6117	7.37385	10.6958	12.84	12.5151	9.74277	15.2774	14.218	12.4993
1.10.7	1000	37	34.8877	26.7928	0.006039	1.70773	8.27101	0.145169	0.705314	0.004106	0.004831	0.021256	8.47657	12.8275	0.065217	0.012319	2.80217	1.89734	82.7568	66.9179	102.601	67.7749	85.9464	36.5261	28.4761	71.3343	91.6478	46.7614	182.893	171.008	131.829
1.10.7	1000	38	75.7905	79.5917	7.36863	44.5392	67.3039	33.9246	32.9265	0.04914	0.256122	15.8173	47.9997	70.0156	0.22816	3.04385	2.44987	0.174553	3.954	107.397	149.619	105.344	106.072	66.861	53.1049	89.364	119.608	69.0065	221.679	214.98	181.39
1.10.7	1000	39	17.3641	24.9637	0.008523	12.0063	33.0093	7.34192	8.98771	0.001784	0.068781	0.826561	23.5384	70.893	1.59663	0.752626	1.59128	0.054509	0.264817	78.3584	120.308	81.7653	117.386	52.7893	41.9915	113.563	132.57	72.1409	213.714	204.5	165.873
1.10.7	1000	40	21.6172	34.9571	8.78312	51.5953	102.822	44.5211	46.9993	0.766376	2.43086	26.163	53.6135	130.705	10.19	40.4833	15.5029	0.133916	0.717613	57.6143	79.1718	42.4527	135.544	38.984	27.6295	132.359	118.608	55.6601	202.316	164.426	114.957
1.10.7	1000	41	42.0098	42.8661	2.37824	35.7526	66.2301	31.342	33.8156	0.013668	0.072803	10.7442	43.5766	106.246	0.252441	7.50349	5.68647	0.122455	62.542	85.6343	130.387	89.3651	87.4466	48.0388	39.0444	77.2167	117.215	63.1997	219.486	213.744	178.657
1.10.7	1000	42	18.8144	10.7502	0.044255	0.283385	0.097632	0.003882	0.02368	0.000776	0.004658	0.10889	0.115295	0.203416	0.221273	0.005047	0.986607	4.38121	0.512228	46.6995	74.9827	49.1413	59.6077	30.0532	23.3676	45.6174	50.631	28.7393	98.9889	88.7997	65.5413
1.10.7	1000	43	252.286	180.81	1.43082	34.0788	72.2866	33.5633	38.9582	0.039642	0.042573	14.4586	42.992	71.8758	0.50162	2.91902	0.687336	0.33102	1.40398	148.12	184.628	134.084	133.106	92.7074	71.6421	98.0318	109.768	68.7008	226.64	219.322	189.965
1.10.7	1000	44	20.7461	25.0202	0.519143	4.3344	29.9746	1.04376	3.53586	0.003646	0.000912	0.095868	13.778	10.1624	0.713309	0.162413	0.567001	3.2165	3.20723	62.4456	97.0144	64.141	81.3462	33.701	26.827	68.574	105.047	52.3133	198.367	189.945	149.56
1.10.7	1000	45	10.3133	3.42848	0	0	0	0	0	0	0.000428	0	0	0	0.001285	0	0	0	0	8.85075	30.4415	18.733	16.973	8.59208	10.3066	12.5381	12.3274	10.1807	17.2561	11.0287	12.1555
1.10.7	1000	46	14.5344	13.2647	0.000924	0.035797	2.29654	0.003233	0.013626	0.000924	0.000231	0.000231	0.249885	0.012009	0.057737	0.000231	0.009007	196.719	13.9025	86.8406	119.706	81.9376	85.3282	43.1411	33.9039	72.9136	110.264	57.5577	227.113	220.801	192.631
1.10.7	1000	47	20.035	32.7726	2.56211	45.1935	95.6004	45.7819	48.3758	0.221943	2.34578	21.8057	52.418	155.566	4.06482	39.6823	12.9033	0.025348	0.463235	99.3998	139.063	96.3036	121.775	66.0704	52.6051	114.433	145.334	82.6275	226.893	219.862	186.047
1.10.7	1000	48	9.1532	4.21536	0	0	0	0	0	0	0	0	0	0	0	0.00076	0	0.00019	0	9.91484	27.9441	17.5685	17.2463	13.3229	10.0108	13.6379	12.7164	10.0551	17.0842	15.1365	12.9679
1.10.7	1000	49	20.8439	32.9556	1.98272	42.8669	76.7741	41.3725	38.4226	0.015824	0.808816	16.6398	48.4118	94.9125	0.370257	15.8626	11.1009	0.01211	0.696754	83.6564	128.532	89.233	85.2378	48.326	40.1968	72.5482	117.167	64.4915	220.396	214.933	179.658
1.10.7	1000	50	175.783	61.7398	0.037896	4.07386	3.81748	0.191029	0.2529	0.031709	0.025909	0.037123	6.84609	9.08082	1.24053	0.03635	0.423047	1.43117	1.43001	94.2231	127.795	84.7873	110.452	57.435	42.9799	95.9118	99.5719	55.0986	186.145	169.583	131.142
1.10.7	1000	51	156.087	65.046	0.505361	12.9468	25.2973	3.2035	5.2165	0.026804	0.052784	0.223711	18.9528	28.808	0.648454	0.030722	1.44165	0.402887	2.73979	91.8487	132.636	90.2701	89.3969	50.3596	39.7146	74.8761	105.83	57.3882	202.939	195.206	156.881
1.10.7	1000	52	133.466	143.619	35.0869	64.5624	64.8634	45.5108	36.9661	0.041356	2.28969	33.556	66.0405	59.4706	0.037119	0.16744	0.084527	0.016744	0.171475	127.785	166.203	115.506	123.463	79.4432	60.8826	87.9899	89.9062	56.328	211.799	199.588	165.482
1.10.7	1000	53	12.7844	16.0122	0.000912	0.502888	2.63515	0.228337	0.38948	0.000608	0.002128	0.022499	2.77409	5.47613	3.0678	0.043174	0.044086	0.013378	0.005169	72.26	96.2408	63.0973	149.092	64.2967	49.1317	157.12	139.011	78.2749	186.588	157.292	115.645
1.10.7	1000	54	13.2034	17.9034	0.013571	1.20571	3.02107	0.12375	0.129286	0.000714	0.002321	0.0075	5.78571	6.83018	1.18411	0.006607	0.030536	0.129643	0.012321	37.9271	76.005	48.0552	105.576	29.3693	23.0693	104.005	104.07	51.7766	180.016	161.859	122.504
1.10.7	1000	55	250.814	145.344	1.87108	34.249	60.6206	27.381	29.9871	0.017002	0.02809	12.4423	40.8607	46.8298	0.040509	0.373596	0.194707	0.308397	0.434211	135.347	172.914	122.319	122.06	82.1075	62.9029	87.4692	97.7531	60.5587	219.965	210.602	177.419
1.10.7	1000	56	77.8547	73.493	16.411	49.2286	57.4994	29.2753	28.0006	0.144686	0.554417	16.2497	47.8624	62.9923	1.13188	3.09603	3.58259	0.070423	1.69334	57.0026	96.58	62.749	68.9097	22.8041	20.8291	50.2554	73.8726	37.3694	182.488	169.507	132.029
1.10.7	1000	57	253.13	160.582	3.13681	43.6207	64.1193	34.1115	34.114	0.018053	0.085664	17.0949	48.2411	100.499	0.081062	0.973805	0.321947	0.01646	0.460885	128.107	168.122	117.246	114.846	78.0442	60.3094	84.5784	93.525	57.1582	215.466	204.608	169.877
1.10.7	1000	58	16.0828	21.9925	0.003568	4.85016	13.1217	1.86407	2.69604	0.001427	0.001784	0.47021	15.4288	55.1966	2.53871	0.687478	0.401356	0.007849	0.028541	36.65	71.9879	41.827	119.783	33.5483	24.7838	124.507	110.592	52.6743	174.419	144.726	102.321
1.10.7	1000	59	250.829	189.028	0.749619	22.7261	56.4987	19.1599	27.1415	0.020837	0.024225	7.35829	34.1891	58.0037	0.938845	0.483991	2.16991	0.362189	3.19312	159.13	188.92	137.36	152.097	105.509	79.8511	118.924	122.347	77.2611	227.424	219.175	189.341
1.10.7	1000	60	11.3798	7.66361	0.001078	0.027763	0.076011	0.001887	0.013747	0	0	0.055256	0.081402	0.089488	0.039623	0.001887	0.267116	79.3744	0.432345	56.2197	76.0278	51.3423	68.0005	36.834	28.3167	55.3582	57.5865	32.8728	104.66	90.8642	69.0914
1.10.7	1000	61	139.082	131.601	0.01356	9.30842	33.6831	5.73447	11.5888	0.024283	0.028382	0.578997	23.4617	26.0684	0.825292	0.034374	5.43929	1.8994	94.1804	122.993	156.746	108.442	125.207	74.1716	56.4658	98.1094	112.916	65.0419	218.911	209.526	175.463
1.10.7	1000	62	80.0381	85.8499	0.166999	6.14349	15.0342	1.14127	1.69639	0.021291	0.021956	0.162342	15.7199	10.4136	0.764915	0.025948	0.444888	1.45309	2.93502	104.208	141.766	96.5414	112.44	62.8261	47.5642	91.8026	105.166	59.5216	204.137	193.744	155.802
1.10.7	1000	63	18.4257	30.4667	0.609773	31.034	75.7659	32.8747	35.7852	0.014982	0.41557	11.5319	41.6255	104.22	1.28325	17.2917	5.07575	0.231308	0.789275	95.7407	137.69	96.9427	110.614	60.0284	48.6017	101.182	137.798	77.4679	225.592	219.722	186.346
1.10.7	1000	64	16.4907	26.478	0.280526	20.2307	52.5104	14.3628	19.4563	0.001932	0.018161	4.90881	29.8311	71.8485	7.50425	5.70479	2.60008	0.001932	0.012365	71.4587	98.7002	62.3532	160.606	69.3458	52.7929	162.976	148.161	82.7249	214.233	186.339	144.253
1.10.7	1000	65	24.2235	16.8146	0.041444	0.835371	0.553285	0.01929	0.072383	0.001337	0.001337	0.008594	1.305	1.67838	0.109435	0.006112	0.620894	1.81513	1.61784	59.8697	95.3526	62.416	70.0665	31.3107	24.8277	56.831	73.1776	38.4165	148.269	137.933	102.505
1.10.7	1000	66	17.4293	23.3984	0.004508	6.44452	14.6994	1.94071	2.43759	0.003814	0.002427	0.333564	16.6793	55.0562	3.28745	0.454577	0.262483	0.003467	0.028433	63.8242	97.9515	62.2261	128.51	50.6283	38.0843	129.823	125.834	66.2677	193.895	170.594	127.035
1.10.7	1000	67	12.9618	14.4473	0.046875	0.271267	1.01845	0.050564	0.099826	0.000434	0	0.020616	1.28689	1.98611	1.40365	0.00803	0.038411	0.157986	0.11263	15.3819	48.7096	28.3678	72.9905	12.8711	10.0822	73.1443	71.9933	31.9062	118.282	101.275	72.7003
1.10.7	1000	68	28.2833	39.0866	5.92026	51.7343	83.499	51.6837	44.6864	0.040542	3.26393	22.6183	55.1203	112.944	0.259766	22.1165	12.2361	0.004699	1.11465	89.5867	136.948	96.4227	79.9323	51.1678	43.0898	66.3395	113.91	64.2645	222.518	217.8	184.613
1.10.7	1000	69	20.3889	30.0022	1.14321	38.3309	68.8689	32.6616	31.4026	0.030511	0.289851	13.51	43.7214	124.89	2.17497	16.0663	6.05013	0.010585	0.136052	70.438	110.009	69.9903	109.43	45.4486	35.622	104.243	120.925	63.0299	211.786	197.629	154.316
1.10.7	1000	70	115.21	49.581	0.012944	4.5355	17.2226	1.07101	3.04142	0.02034	0.02145	0.061021	12.8354	18.8924	0.64682	0.031065	1.79253	2.53772	73.8598	76.9756	116.928	78.6398	83.6908	40.5673	32.4149	69.9216	98.6768	51.5999	195.435	186.669	147.983
1.10.7	1000	71	113.325	102.185	12.1584	45.9284	64.3752	35.2805	33.3612	0.091252	0.198341	16.8884	47.5004	48.0747	0.494344	1.75113	1.9721	0.548265	2.04676	94.2541	134.558	92.7658	94.3511	53.9449	43.3812	77.7104	108.12	60.5475	215.952	207.416	171.992
1.10.7	1000	72	122.43	62.704	5.62702	48.3459	62.8213	37.9303	33.4863	0.020482	0.661051	17.8893	50.2689	123.211	0.403039	6.51635	2.10307	0.019491	0.842749	84.3911	131.786	90.0126	72.7645	43.8705	37.5477	59.2022	94.5996	52.4159	209.79	202.572	165.77
1.10.7	1000	73	19.9908	23.1938	6.84185	8.92043	43.3098	4.2112	7.78815	0.02554	0.004912	0.654551	14.9702	13.3716	2.2757	0.648985	0.488867	50.651	4.04551	80.372	116.365	80.2921	98.5737	55.6166	44.3281	90.4388	137.146	74.1837	225.392	220.279	188.324
1.10.7	1000	74	10.0619	3.45682	0	0	0	0	0	0	0	0	0.000714	0	0	0	0	0.003807	0	8.25863	30.4033	19.5215	17.8225	10.7956	10.8906	12.9267	11.2891	9.03497	14.232	14.3029	13.7675
1.10.7	1000	75	10.2419	3.26817	0	0	0	0	0	0	0	0	0.002006	0	0	0	0	0	0	8.9173	30.0613	18.7231	12.3486	11.4429	11.0876	12.3052	11.496	9.46924	15.5181	11.7287	10.0745
1.10.7	1000	76	9.39533	6.08473	0.015499	0.17173	0.143418	0.035338	0.040091	0	0.002893	0.053317	0.031411	0.301095	0.308328	0.000207	0.094648	1.97913	0.032651	1.34098	7.5869	4.80864	5.60198	1.55817	1.58401	2.55177	3.91093	2.24985	8.58297	7.41124	7.98429
1.10.7	1000	77	9.83228	7.49683	0	0.079114	0.056962	0	0.001582	0	0	0.199367	0.03481	0.471519	0.314873	0.004747	3.16297	3.77215	0.691456	1.70728	13.1218	8.08228	15.4652	4.98418	4.88924	21.6266	26.5601	13.2611	11.8513	13.0934	12.1741
1.10.7	1000	78	65.0122	41.3108	0.008515	17.2927	40.3135	14.6509	17.0676	0.006386	0.012241	7.42203	37.8387	146.486	0.534859	13.2783	42.9319	0.031932	2.07398	74.752	114.703	77.5471	102.781	48.711	39.0112	99.3688	145.377	75.0261	216.402	211.897	172.323
1.10.7	1000	79	9.53893	4.4063	0	0	0	0	0	0	0	0	0	0	0	0.000613	0	0.013693	0	7.89393	28.1561	18.3123	14.899	11.4919	9.95994	15.2352	14.804	12.654	20.6307	16.4167	16.541
1.10.7	1000	80	18.1731	32.8916	3.35819	45.1207	105.444	49.0806	52.7311	0.378282	3.53533	24.5157	52.495	137.209	4.39481	42.7339	12.5285	0.010535	0.308266	129.449	164.086	120.935	128.168	84.8512	67.1622	114.777	156.564	94.8533	231.746	226.666	199.124
1.10.7	1000	81	14.804	15.6144	0.003473	0.186208	6.25864	0.013064	0.03109	0.001819	0	0.002646	1.12568	0.239458	0.104019	0.007276	0.012072	159.766	9.78899	98.0693	128.88	90.5652	104.933	59.2147	46.62	94.6084	128.419	70.8986	226.107	219.353	189
1.10.7	1000	82	98.016	92.3322	0.363663	10.4049	9.87611	1.97451	1.64197	0.021043	0.0246	0.503557	18.1479	12.1734	0.478957	0.021932	0.711915	1.60403	2.79668	78.449	118.148	77.6666	90.1352	43.1458	32.9226	69.2404	82.4674	44.1375	183.362	170.965	132.713
1.10.7	1000	83	10.0086	4.70169	0.000176	0	0	0	0	0	0	0	0	0	0	0.001587	0	0.081276	0	8.35578	32.0494	20.8487	14.5582	9.74577	10.0689	14.4475	13.9376	10.9774	17.0143	19.5127	16.3736
1.10.7	1000	84	11.4286	8.46488	0.010183	0.057113	0.097698	0.002656	0.011068	0.000148	0.004723	0.025236	0.050472	0.276122	0.867178	0.001033	0.016972	0.207202	0.004575	10.6665	38.321	21.1679	39.4665	10.4461	6.59799	43.2321	42.6139	17.8312	49.8644	42.4122	28.0949
1.10.7	1000	85	152.661	158.813	0.787298	26.9113	52.1566	20.0168	24.8561	0.024297	0.020034	6.75128	37.6754	56.6413	0.528986	0.189045	3.52622	0.043905	5.80797	137.691	172.458	121.421	136.309	87.0149	65.7688	106.524	113.954	68.3419	221.696	212.149	178.87
1.10.7	1000	86	0	0	0	0	0	0	0	0	0	0	0	0	0	0	0	0.543624	0	54.2081	76.1007	55.9732	93.8255	66.7517	53.604	0	0	0	43.349	44.5101	39.7852
1.10.7	1000	87	17.4391	7.30046	0.001715	0.102344	0.365923	0.124071	0.157233	0	0.001144	0.011149	0.0992	0.429102	0.144082	0.000286	0.058605	1.95197	0.030017	22.6115	51.3548	34.7121	29.1655	17.5738	15.6315	24.0686	29.3836	18.8522	35.2381	35.8411	29.9454
1.10.7	1000	88	15.9514	16.7373	0.110978	0.991002	2.53689	0.541692	0.805639	0.0018	0.0012	0.332334	2.69826	6.16437	190.768	0.766647	0.626875	0.514697	0.603479	23.4529	51.9172	29.4691	84.7403	21.0366	15.3263	91.2364	82.0654	36.5573	104.717	84.5129	58.1584
1.10.7	1000	89	12.8129	11.2322	0	0.111868	0.289559	0.051232	0.015888	0.000324	0	0.008431	0.200389	0.027237	0.041829	0.000649	0.00454	194.233	9.34857	132.551	152.108	110.441	114.78	73.9608	57.9624	97.6336	115.764	68.4792	221.184	209.396	177.746
1.10.7	1000	90	9.25858	3.85634	0	0	0	0	0	0	0	0	0	0	0	0	0	0.002288	0	0.000254	0.001271	0.002288	0.001271	0.000254	0.001017	15.8998	14.2746	11.9736	0.079074	0.067124	0.061022
1.10.7	1000	91	13.4682	16.6557	0.436706	1.5392	5.67674	0.496277	0.718791	0.000876	0	0.242663	4.52212	5.86991	2.84012	0.101621	0.152431	0.589137	0.16601	78.5615	95.2383	53.9216	131.057	50.4634	31.618	127.76	112.753	53.9308	186.452	148.364	91.9921
1.10.7	1000	92	205.182	73.5098	0.389535	30.7885	40.7724	15.0264	15.2589	0.021467	0.038909	5.00894	35.1936	89.5496	0.989267	0.573792	4.90742	0.018784	1.52057	80.1767	124.866	83.7706	72.864	40.6597	34.7433	58.0416	86.8479	47.2607	198.217	188.55	149.916
1.10.7	1000	93	12.2465	10.9696	0.062528	0.27423	0.697186	0.022778	0.070121	0.000447	0.008486	0.031711	0.902188	2.17954	2.20054	0.053149	0.027244	0.092899	0	28.146	50.0456	24.5324	95.2689	21.2983	10.5217	101.167	75.0397	27.8825	100.281	64.2162	34.7901
1.10.7	1000	94	24.6117	36.7588	0.216184	4.15549	89.597	20.6394	41.8167	0.490678	0.008727	2.48711	35.7346	71.5081	0.845696	25.1031	61.4701	0.493852	124.285	67.2693	102.202	66.424	70.2729	32.3435	27.6049	57.3943	117.142	57.7985	220.267	214.579	179.581
1.10.7	1000	95	10.2967	3.59057	0	0	0	0	0	0	0	0	0	0	0	0	0	0.006288	0	6.89021	29.6534	18.3473	16.0559	9.44692	11.5122	14.9037	13.4046	11.2614	15.0924	13.162	9.84111
1.10.7	1000	96	12.5606	12.6772	1.01025	0.965841	1.7579	0.212212	0.306576	0.002135	0.001281	0.192143	1.86166	3.14518	93.3143	0.127242	0.218617	0.476516	0.595645	16.6657	43.0773	22.9334	69.8254	14.2741	9.4082	71.2284	65.1332	26.5128	90.9163	71.5107	47.4688
1.10.7	1000	97	93.6074	66.4698	1.29251	11.5503	30.4648	5.86689	7.68792	0.024609	0.02349	0.741611	22.3535	23.1516	7.15996	0.182886	1.50671	2.56096	4.38591	54.0028	92.0716	61.0912	74.6353	30.547	25.4692	62.2975	102.266	51.2545	195.46	188.389	148.619
1.10.7	1000	98	13.1108	14.6601	0.275566	0.460196	2.05328	0.06583	0.051439	0	0.000306	0.011941	0.552358	0.081445	0.591549	0.006124	0.009798	248.424	41.1641	124.63	149.635	108.487	125.865	78.6347	62.3809	109.97	130.184	77.4253	227.514	218.592	190.874
1.10.7	1000	99	87.2635	92.9023	11.7397	52.5263	66.8393	41.2683	37.0466	0.036995	1.35108	21.6504	54.8208	94.9768	0.054993	3.45794	1.27534	0.016623	0.754531	108.357	152.733	106.562	98.4071	63.339	50.5218	76.5951	100.777	59.0505	217.068	209.185	174.327
1.10.7	1000	100	11.1709	8.75432	0.053728	0.142012	0.197633	0.004024	0.010888	0	0	0.061302	0.198343	0.534438	2.1742	0.012781	0.092071	0.32355	0.084734	13.0684	36.2705	17.925	52.8783	11.009	5.16237	53.4372	42.5778	14.0443	57.8076	39.5972	22.787
1.10.7	1000	101	13.8146	13.3991	0.000858	0.05337	1.86851	0.005294	0.013879	0	0.000143	0.001002	0.322936	0.045786	0.0817	0.000286	0.004722	151.599	6.25511	93.9336	122.58	85.0608	90.3796	49.9672	39.0289	79.2597	112.501	60.4939	219.443	211.04	177.122
1.10.7	1000	102	16.5024	23.1178	0.001447	7.32941	18.3797	2.39816	2.16118	0.004161	0.005789	0.078509	16.9705	40.6999	1.28184	0.063676	0.339001	0.046671	0.045405	64.8743	106.059	70.4336	119.228	46.6939	36.441	117.966	125.438	66.3323	205.133	192.395	151.476
1.10.7	1000	103	251.392	195.951	0.068025	3.91447	8.21699	0.304822	0.857348	0.022962	0.023823	0.070034	12.0652	5.90327	0.348737	0.018083	0.268083	1.01665	10.3525	113.502	151.356	103.223	114.189	71.5181	54.6349	80.9475	79.6739	49.5227	191.353	174.867	140.291
1.10.7	1000	104	8.81366	9.02053	0.062628	0.050821	0.000513	0.000513	0.061088	0.033368	0.00462	0.009754	0.120123	0	0	0.006674	0	230.214	26.5051	16.6566	36.6971	24.1355	98.1966	62.923	50.3414	87.8953	94.1222	58.2803	28.9959	27.6165	24.0067
1.10.7	1000	105	14.5977	20.93	0.002252	4.90727	10.9466	0.919959	1.06141	0.004708	0.001433	0.057523	13.0448	28.399	1.44811	0.037871	0.105629	0.008802	0.006755	42.0811	80.1705	49.2334	121.658	35.7118	26.5169	122.748	115.404	56.6923	191.809	170.027	127.556
1.10.7	1000	106	7.79254	3.99717	0.000177	0	0	0	0	0	0	0	0	0	0.006185	0	0.032691	0.006185	0.002474	4.96378	16.0489	7.98657	17.1117	9.87772	9.88266	12.988	10.9417	9.52094	14.2062	11.8737	9.45573
1.10.7	1000	107	52.2959	53.7417	8.14367	43.258	64.8296	34.8688	33.2604	0.075207	0.150415	12.9634	44.3107	52.7873	0.465249	2.92609	5.03008	0.335322	3.92972	80.3779	125.38	86.7682	81.3659	46.5762	38.6043	69.3742	110.824	60.6686	215.027	208.787	172.967
1.10.7	1000	108	200.178	52.1024	1.15947	8.08693	22.0382	1.4474	2.59745	0.022702	0.017165	0.159468	5.53655	1.80676	0.01938	0.035437	0.224806	67.4983	2.46733	101.818	136.869	96.4297	100.066	61.9468	49.119	84.9385	122.363	69.2724	224.909	218.841	190.372
1.10.7	1000	109	7.97548	4.09147	0.000189	0	0	0	0	0	0	0	0	0	0.003206	0	0.009242	0.114674	0.001697	4.5794	17.4393	11.3636	15.9319	8.74651	7.37326	13.312	11.4289	5.92286	15.9344	12.5294	9.22407
1.10.7	1000	110	192.15	103.153	1.47768	18.7917	23.7001	4.88576	4.16711	0.014878	0.0178	0.970776	22.3913	14.5088	0.327577	0.017003	0.592455	0.348831	1.50106	97.6134	135.948	91.0056	93.4357	57.8539	44.3834	66.3382	80.6336	47.1206	197.345	185.61	147.535
1.10.7	1000	111	166.161	147.997	30.6001	72.3688	108.642	71.103	65.5174	2.73017	11.8881	39.821	74.0764	145.027	0.499259	31.7809	5.67309	0.030764	1.65456	141.617	180.772	131.882	123.765	87.5708	68.7127	96.1049	115.95	71.5901	228.17	221.933	193.116
1.10.7	1000	112	47.6434	41.831	0.064609	18.2948	31.7713	7.30639	9.67407	0.015098	0.014876	0.584591	24.7129	54.9907	0.310835	0.067718	3.31128	0.081261	2.74156	85.3865	126.161	86.2853	95.7524	50.1652	39.7309	83.6903	111.163	60.3168	202.985	194.518	155.69
1.10.7	1000	113	22.5659	26.2575	0.117615	4.62168	52.0033	14.8266	15.9821	0.031978	0.00271	6.04011	24.7534	43.7751	84.11	7.12303	6.79837	16.4125	118.042	65.8076	100.012	67.7252	92.9691	47.31	37.4981	85.6531	140.822	73.2997	219.191	214.641	176.965
1.10.7	1000	114	40.4256	37.1248	0.384793	7.82291	23.9918	1.98288	3.71165	0.008887	0.006254	0.053983	18.0267	19.6959	1.03785	0.077354	1.08065	0.868334	3.99012	51.9835	95.7735	63.8733	65.213	24.4677	21.6481	53.6159	97.079	48.104	193	188.334	149.652
1.10.7	1000	115	30.06	32.2669	0.046846	5.46284	40.2213	4.21783	11.8868	0.008432	0.002811	0.154591	19.5422	29.4908	0.780762	0.181449	2.21955	0.655059	54.4806	87.2825	125.622	86.4828	97.8556	51.8899	40.7667	89.2294	128.018	68.5006	216.978	210.981	175.083
1.10.7	1000	116	21.2516	26.4699	0.314965	3.37376	31.9201	1.60482	5.42237	0.001182	0.002807	0.10031	15.5026	17.3003	0.664943	0.095878	0.57852	1.39105	2.39223	80.7667	116.96	80.0697	97.6384	50.0366	39.1743	88.8944	127.752	67.5444	212.47	206.097	168.099
1.10.7	1000	117	16.9162	29.5407	1.72063	37.5447	85.034	33.5547	37.8555	0.013351	0.588451	16.8845	44.9793	114.007	9.52136	27.6999	10.0567	0.029372	0.111148	76.1993	100.956	60.4242	147.805	61.5541	45.997	145.358	140.207	74.3458	218.146	190.991	144.296
1.10.7	1000	118	28.0019	36.7568	189.949	112.8	88.0389	56.9611	37.2724	3.86381	9.75097	43.9008	70.2996	64.0078	43.3191	8.71012	9.30545	1.55058	7.58366	71.5798	106.914	71.144	79.0039	41.0078	32.3794	65.6089	104.916	53.4027	203.833	194.767	155.673
1.10.7	1000	119	23.9609	34.6598	0.606812	1.77754	63.0278	9.32801	26.9895	0.060555	0.16106	0.587048	25.4146	35.0875	0.003364	8.67746	216.344	1.00967	128.933	89.6615	130.46	90.9584	81.7595	54.6968	44.9525	72.812	137.46	75.2443	229.023	225.433	198.44
1.10.7	1000	120	24.5626	25.6977	0.004942	0.260297	11.9283	0.823723	3.4967	0.080725	0.001647	0.129325	6.99341	6.83526	0.722405	0.981878	28.0346	4.21417	136.806	25.346	53.7768	32.1244	53.9893	11.2924	8.72405	35.0486	56.0008	23.1236	130.938	121.03	89.4868
1.10.7	1000	121	118.553	122.436	1.09593	21.8345	63.5572	20.9789	30.5364	0.054109	0.023399	5.65575	37.6961	62.7654	0.297163	3.78035	4.99561	0.052939	65.0974	127.161	164.739	115.967	121.607	77.002	59.5674	98.9789	124.801	72.086	226.062	219.729	189.774
1.10.7	1000	122	21.9725	30.5751	0.027854	1.77913	55.8337	7.6783	21.2993	0.003531	0.001177	0.329149	24.3327	40.634	1.71832	4.28168	8.50765	0.469988	51.246	52.2727	89.1608	58.4115	64.7434	25.7646	22.4378	53.7364	112.454	55.111	211.707	207.65	171.232
1.10.7	1000	123	166.71	161.405	18.2385	55.7076	70.6438	43.4103	39.471	0.088778	0.8732	26.0386	59.6329	78.1203	0.11148	1.27944	0.638797	0.016427	0.370616	134.748	172.556	121.373	126.973	83.5875	63.962	92.0677	95.49	59.5236	217.5	206.599	173.245
1.10.7	1000	124	113.151	107.186	0.550775	5.25413	66.4162	13.9675	31.4977	0.034017	0.109055	1.51276	32.0315	41.7769	0.295648	7.33667	118.66	0.077539	115.854	116.865	157.01	110.682	101.095	68.6633	54.5678	84.3447	135.825	77.3892	231.618	228.482	204.707
1.10.7	1000	125	25.3073	38.7838	0.255649	2.79359	114.242	30.6776	58.4503	3.51062	0.213491	4.94401	40.7636	84.5481	0.231703	51.9882	180.292	0.335582	157.586	87.8776	128.743	88.856	81.6631	53.6661	45.1258	75.1278	147.576	80.1069	233.159	230.641	207.942
1.10.7	1000	126	11.4506	11.1322	0.000106	0.096798	0.157962	0.00585	0.015637	0.000213	0	0.000851	0.415488	0.645889	1.19317	0.002021	0.007127	0.013616	0.000319	30.9634	57.022	31.4925	114.181	32.9046	20.4456	121.804	96.7251	43.1646	146.77	110.664	71.5758
1.10.7	1000	127	251.49	137.636	0.429784	16.6222	36.4448	5.063	9.99109	0.020365	0.016546	0.555367	22.9813	15.7325	0.243954	0.029487	0.338354	0.348536	0.550064	120.088	159.507	111.106	107.812	72.0997	55.6701	77.2541	91.3842	56.0838	213.132	203.026	167.55
1.10.7	1000	128	62.8259	51.9946	1.18641	17.2087	68.0282	23.3664	31.7763	0.17083	0.04029	5.02444	34.737	74.4991	3.70749	7.47677	11.5394	1.79345	229.525	97.9812	136.78	95.9296	99.5154	57.7002	46.6933	89.4811	131.019	72.6573	224.816	219.252	187.41
1.10.7	1000	129	17.2726	21.9386	0.217386	1.30066	12.6799	0.17946	0.299752	0.000261	0.177636	0.098658	8.12772	2.27382	0.976802	0.023198	0.129675	2.49524	1.49511	71.5519	107.205	73.5059	94.3542	49.2931	38.7975	86.1629	125.121	66.5939	209.156	203.276	164.965
1.10.7	1000	130	18.8634	19.6498	0.034459	2.58632	2.32454	0.028833	0.032876	0.000527	0.000527	0.045007	5.59459	1.59722	1.57753	0.007736	0.62289	1.37588	1.19568	45.8703	81.0536	53.1786	57.1459	24.574	20.3335	42.2059	72.9175	36.4015	168.925	162.023	123.052
1.10.7	1000	131	125.572	50.5204	0.332315	29.5434	43.4993	14.4752	16.056	0.026137	0.03666	3.64766	34.0893	91.9559	0.740326	0.589952	4.34148	0.058724	1.59471	77.3048	123.092	82.8595	70.0068	38.4073	32.9484	58.3055	93.0499	50.1816	202.36	194.336	155.346
1.10.7	1000	132	22.6404	18.458	0.000792	0.160507	28.0892	0.043031	0.712249	0.000264	0.000792	0	0.600581	0.04831	0.001056	0.000792	0.024551	28.6568	0.090813	114.139	152.043	109.694	89.3828	62.6663	50.3735	79.911	144.824	80.4517	237.532	236.358	229.51
1.10.7	1000	133	0.145946	0.086486	0	0	0	0	0	0	0	0	0	0	0	0	0	2.16216	0	112.1	134.532	99.7676	103.708	73.9568	58.3892	0.348649	0.408108	0.178378	152.941	144.276	119.484
1.10.7	1000	134	7.73124	3.94693	0	0	0	0	0	0	0	0	0.000179	0	0	0	0.011615	0.017513	0	5.27734	15.3492	12.7252	14.6662	7.44871	9.7307	13.5161	10.7261	10.2398	13.7182	9.84435	9.59614
1.10.7	1000	135	37.4919	23.9329	0.035536	1.51345	0.881767	0.038193	0.09897	0.006974	0.005978	0.015277	2.94653	3.15842	0.400531	0.014945	0.653603	0.695118	1.60047	40.5553	80.0133	51.2052	58.649	17.4802	14.8044	46.6878	61.2507	29.5178	134.384	124.529	91.7107
1.10.7	1000	136	11.6514	9.57016	0.000574	0.004304	0.115925	0	0	0	0	0.000287	0.106456	0.014347	0.000287	0.000574	0.000287	157.34	3.59311	91.7687	113.242	77.1329	79.5102	42.3133	32.278	64.4172	80.2557	43.1174	188.222	171.872	135.094
1.10.7	1000	137	8.80908	6.43834	0.051084	0.033282	0.000774	0	0.000258	0	0	0.019092	0.02451	0	0.000258	0.004128	0.074045	187.776	4.28199	6.121	20.3653	13.8955	23.1032	10.7779	9.36507	17.7299	24.1471	12.5304	21.2407	20.0697	17.9587
1.10.7	1000	138	13.9052	13.7635	0.108486	0.139906	0.799728	0.015957	0.024617	0.000371	0.000495	0.002721	0.396586	0.072241	0.029565	0.002103	0.011752	65.1642	1.52301	63.1387	92.3725	61.5642	76.2632	34.7086	26.585	65.4802	91.7728	46.5366	178.929	169.416	130.133
1.10.7	1000	139	17.8797	15.3639	0.004222	0.054238	8.52777	0.010231	0.106203	0.000325	0	0.005196	0.612212	0.073563	0.03329	0.001299	0.001462	150.846	5.42189	100.015	133.693	93.9992	87.9875	50.4388	39.7934	77.271	124.077	66.2119	234.303	230.845	211.487
1.10.7	1000	140	195.487	52.8326	0.138915	4.6602	3.11646	0.157858	0.156922	0.031805	0.025959	0.040458	6.4268	6.59729	0.387512	0.024556	0.897802	1.97521	2.74556	69.5468	108.441	72.1153	75.2542	37.8005	30.4167	59.9156	78.8894	42.4179	169.784	158.569	122.03
1.10.7	1000	141	249.938	122.313	2.91907	41.1761	49.8587	29.2728	26.173	0.015535	0.102962	14.1505	45.3403	83.3103	0.016799	0.089595	0.13638	0.013728	0.111452	109.865	151.939	102.978	100.784	64.4214	49.9648	72.1171	82.6667	49.0759	203.269	191.483	155.304
1.10.7	1000	142	14.3829	13.8249	0.032376	0.095735	0.889817	0.006614	0.017406	0.000348	0.001218	0.007311	0.306005	0.044038	0.036554	0.001218	0.001567	78.2609	1.00696	88.9951	115.356	79.3246	88.8287	49.0324	37.6505	78.4547	105.965	56.8002	197.521	186.977	147.918
1.10.7	1000	143	250.825	142.536	5.53318	49.9992	85.2944	44.043	45.293	0.027762	1.34931	23.8724	54.6461	134.459	0.168663	15.3444	1.29816	0.02586	0.957977	136.59	176.06	126.037	116.724	82.3206	64.2299	89.6205	109.563	66.8842	225.92	219.125	188.535
1.10.7	1000	144	13.5512	14.1871	0.190409	0.198402	3.32957	0.112835	0.180536	0.003761	0.000235	0.07922	1.04325	0.407616	0.207804	0.024213	0.007052	159.256	11.464	58.5376	91.5595	60.815	76.7332	31.9126	24.7492	65.9676	99.3756	49.5207	202.701	193.783	156.343
1.10.7	1000	145	0.019506	1.04663	0	0	0	0	0	0	0.003353	0	0	0	0	0	0	0.016763	0	4.83907	14.708	9.84486	13.4727	10.3209	8.20603	10.0945	10.2627	7.84243	13.2801	12.3276	10.9503
1.10.7	1000	146	83.0333	41.4351	0.057698	25.6557	36.4187	9.59179	11.5899	0.015736	0.015736	1.72508	30.1432	84.1753	0.574514	0.291268	8.27368	0.042888	1.89047	71.0716	114.162	75.6945	72.8831	34.8275	29.6254	61.4619	94.6313	49.0475	197.506	188.589	148.29
1.10.7	1000	147	18.2249	15.5118	0.131192	0.884993	0.834723	0.013487	0.035066	0.001717	0.000981	0.255272	1.3872	1.40387	0.374203	0.024031	0.479156	5.5792	2.43404	73.8281	98.602	63.0152	89.5738	41.4402	29.4122	73.411	82.4105	41.8909	169.485	150.17	109.165
1.10.7	1000	148	16.1072	15.7369	0.001218	0.378806	1.79111	0.119976	0.328867	0.001827	0.090134	0.351401	2.24604	3.93727	1.31242	0.488429	0.021315	2.47503	0.03106	34.6267	73.8886	55.0457	62.218	32.2363	33.6882	73.4001	88.3861	56.5847	56.2479	66.958	61.3106
1.10.7	1000	149	24.5531	32.5729	0.124895	1.91575	45.5343	6.64848	18.2544	0.001474	0.002106	0.098778	23.6672	36.5175	0.195029	0.929865	60.0114	0.328559	158.34	69.8492	110.06	74.7904	71.2826	38.3667	32.6613	61.9935	123.125	63.9726	220.452	217.346	185.385
1.10.7	1000	150	11.5127	9.77461	0.022669	0.034766	0.058022	0.000587	0.003876	0	0.005168	0.017148	0.099013	0.20942	1.07306	0.001175	0.004933	0.043928	0.002232	25.8874	51.6591	28.4861	90.8633	25.9762	15.7583	97.5965	79.0315	34.1668	116.331	87.0731	55.2276
1.10.7	1000	151	129.303	48.1468	0.118075	4.03995	4.904	0.155595	0.203487	0.024498	0.028691	0.043037	7.62392	8.44427	0.734275	0.024939	0.560803	1.13088	1.98234	74.0717	113.181	75.5028	81.1437	38.7069	30.9411	67.7936	89.7888	47.2024	180.708	170.194	131.604
1.10.7	1000	152	244.194	137.004	1.66141	10.6952	34.6112	4.58653	9.81642	0.020361	0.029885	0.762562	17.8164	12.6151	1.33793	0.120854	0.817734	9.57438	3.97603	147.331	176.206	127.852	145.056	100.202	78.0305	118.285	132.665	83.6598	228.622	221.531	192.856
1.10.7	1000	153	7.81122	4.02804	0.000171	0.005814	0	0	0	0	0	0.003249	0.000513	0.007695	0	0.000171	0.013167	0.036081	0	4.63441	15.0797	8.74025	14.1756	7.32627	7.47572	13.4183	13.406	10.2461	14.3422	11.6825	9.97196
1.10.7	1000	154	9.30168	4.26897	0	0	0	0	0	0	0	0	0	0	0	0.000996	0	0.003819	0	9.49975	27.9663	18.5022	16.6083	8.827	10.0682	14.292	13.9113	10.3158	17.5778	18.0387	13.3878
1.10.7	1000	155	38.3771	35.0082	0.13363	16.8189	237.111	99.7179	153.911	71.2435	22.6073	43.2673	65.0097	177.791	72.7906	197.588	29.121	24.7365	141.053	81.2183	114.092	78.4788	109.041	61.9926	49.6852	100.451	151.941	82.8471	228.132	221.479	190.109
1.10.7	1000	156	14.5012	11.5276	0.024702	0.052734	0.74882	0.002775	0.001665	0	0.000278	0	0.109908	0.001943	0.01249	0.000833	0.012767	56.8626	0.360255	108.488	133.884	93.5717	81.2953	53.695	41.6883	68.7447	101.57	56.0758	219.897	210.183	174.844
1.10.7	1000	157	75.7845	77.2815	0.270817	15.5912	29.2185	5.57018	7.71253	0.016059	0.022205	0.495837	24.4629	29.2734	0.460349	0.036677	2.23692	0.258327	3.523	85.1495	128.09	86.8818	89.9556	47.138	37.3295	74.3015	104.396	56.1493	203.713	196.315	158.289
1.10.7	1000	158	21.7839	23.8944	0.006267	1.3396	25.9838	3.06012	5.98677	0.001857	0.002089	0.151114	14.6059	11.0724	2.44197	0.131616	9.3454	24.2602	243.192	78.9278	109.51	75.9111	95.0485	51.6031	41.0376	88.7902	133.576	71.455	216.244	211.158	173.973
1.10.7	1000	159	243.981	124.288	3.79091	42.0682	96.5527	48.8405	53.6495	1.27864	1.655	19.8345	48.555	89.8055	1.17318	25.7423	3.60727	1.39454	2.88727	124.484	168.015	122.264	107.119	76.9586	62.2423	86.4995	122.975	74.3386	228.172	223.284	195.116
1.10.7	1000	160	13.5084	16.4416	0.192509	0.812894	1.72952	0.04286	0.037097	0.00018	0.00036	0.075275	2.6166	1.15703	1.27409	0.006843	0.06627	2.88439	1.00702	30.5323	61.7158	40.646	59.6937	20.184	17.2341	46.3393	80.0041	39.1592	158.332	153.659	115.242
1.10.7	1000	161	252.116	250.049	0.257347	11.6405	47.1393	9.5316	21.4558	0.004111	0.016903	3.16065	27.6038	32.3352	0.883052	0.033958	1.34369	0.800213	4.70336	180.478	204.896	153.874	177.897	129.899	99.4012	138.445	125.044	84.265	231.669	223.667	197.769
1.10.7	1000	162	86.9923	80.7842	4.06229	38.7729	37.9277	19.5294	16.7096	0.028454	0.120995	7.88208	39.2107	53.585	0.180979	0.141246	2.67496	0.109459	1.14022	83.7226	127.558	85.6224	86.8221	45.2089	36.1138	66.9954	88.2563	48.2397	198.246	188.004	149.717
1.10.7	1000	163	13.5518	6.74739	0.009668	0.048963	0.007017	0.00078	0.000312	0.000156	0.014814	0.031031	0.003898	0.012631	0.09434	0.000312	0.381101	1.77078	0.096211	18.6821	38.732	24.8252	34.6886	17.0274	13.2755	27.3153	27.0083	15.7313	48.8681	41.4363	30.7672
1.10.7	1000	164	248.357	131.053	8.3913	50.3285	65.3942	40.9209	37.0288	0.016073	0.455388	21.8642	53.2256	104.848	0.026994	1.02102	0.112096	0.013806	0.281475	119.599	160.393	110.445	108.12	71.7323	55.3134	78.5704	90.8757	54.5829	212.477	201.975	166.503
1.10.7	1000	165	145.205	69.558	2.83372	46.1288	86.3948	46.2573	46.278	0.156909	1.99598	21.1211	51.4754	131.224	0.638675	26.2175	5.15825	0.216126	3.02877	111.239	157.57	112.362	89.5018	64.0806	52.0244	75.0953	117.49	68.6966	225.806	221.167	190.293
1.10.7	1000	166	11.8171	11.3595	0.003708	0.085805	0.161944	0.005826	0.014698	0	0	0.001192	0.345604	0.819783	1.58938	0.002119	0.002383	0.025424	0.001721	40.7446	66.4436	38.1025	121.807	40.6805	26.8439	130.989	107.482	51.2785	153.05	119.224	78.8354
1.10.7	1000	167	111.148	85.9834	0.193559	14.0555	55.3677	14.2819	23.8217	0.068878	0.024235	2.08004	29.9174	53.2015	2.12054	1.61799	9.08801	0.753189	165.568	113.822	151.076	105.486	109.241	66.3438	51.9815	92.4184	123.859	70.0128	223.195	216.369	183.771
1.10.7	1000	168	132.837	154.972	0.372214	15.0755	37.3535	8.44188	13.2935	0.01847	0.020879	1.65971	28.0225	27.9813	1.09978	0.019072	0.689621	0.102188	2.90062	135.847	170.776	119.404	136.437	85.3266	63.9022	106.161	112.019	66.6175	220.136	209.902	175.999
1.10.7	1000	169	252.927	239.189	0.150091	6.80192	26.8043	2.54038	7.76998	0.011717	0.020365	0.424187	19.1456	16.9589	0.732599	0.003348	0.618636	0.999721	3.17311	150.341	182.613	130.614	148.024	100.628	76.3567	111.017	105.965	67.8883	220.903	209.139	176.506
1.10.7	1000	170	23.4907	21.9687	0.161902	2.56102	43.5816	0.867784	4.79302	0.003299	0.000825	0.181968	5.96482	2.81693	0.12232	0.112699	0.060198	70.5143	3.11517	98.9852	135.843	96.1682	93.9904	58.0728	46.4024	86.0456	143.062	78.0937	234.602	231.94	213.047
1.10.7	1000	171	116.779	109.637	0.011811	5.07835	66.9189	15.3429	31.728	0.045276	0.028346	2.1311	33.2748	51.6248	0.29252	9.72638	171.796	0.230709	219.412	116.434	155.164	108.724	103.65	68.6283	54.274	83.0437	129.054	73.4756	230.201	226.53	201.411
1.10.7	1000	172	134.555	67.5281	1.05994	32.8831	49.0742	23.9244	23.8205	0.034287	0.085583	7.16901	37.4533	74.5178	0.580994	1.08936	4.57397	0.100432	2.76161	90.6029	136.574	93.5378	80.9295	48.7011	39.6007	66.3445	100.569	55.6593	210.563	203.665	166.631
1.10.7	1000	173	48.5795	52.9872	3.52908	44.0146	64.6219	37.0629	33.8121	0.019165	0.539885	15.1083	47.8575	96.4079	0.292219	5.86241	4.16871	0.02801	2.46585	91.0858	137.587	95.8921	86.799	53.2734	43.5474	73.5946	110.488	62.1735	217.794	211.577	176.137
1.10.7	1000	174	8.82004	3.5255	0	0.000131	0	0	0	0	0	0.000654	0.000131	0.005231	0.000916	0.000131	0.000785	0.013733	0.002616	0.022626	0.074287	0.045383	0.119278	0.063432	0.06147	12.6959	11.8298	9.24287	17.8548	15.3179	14.3607
1.10.7	1000	175	250.262	175.546	0.213069	7.4423	22.7565	2.47111	5.88196	0.020552	0.024943	0.541542	18.2036	19.1286	0.466714	0.015282	0.536624	0.403478	2.31846	147.689	178.615	125.628	144.574	96.1623	71.6766	111.131	107.091	67.01	218.526	206.051	170.819
1.10.7	1000	176	13.9489	12.9594	0.161861	1.19594	1.30472	0.178899	0.266055	0	0.041284	0.330931	0.835518	2.96461	1.58257	0.087156	0.956094	0.865007	0.442333	1.82831	11.8565	6.16252	9.26016	1.5	1.49738	3.95151	5.5059	1.96396	15.6966	13.1337	11.7372
1.10.7	1000	177	182.423	190.43	11.1288	46.607	63.5686	31.7402	31.4105	0.023028	0.07062	18.8858	50.7056	50.3842	0.146229	0.200154	0.631357	0.016312	0.306083	147.055	181.023	129.075	141.213	94.3362	71.5746	104.367	104.072	65.5465	221.918	211.292	179.016
1.10.7	1000	178	26.0478	31.4355	0.405873	26.6991	39.0861	14.932	15.6944	0.004361	0.004506	2.01352	30.709	57.4316	0.385376	0.219799	10.2262	0.121529	2.65838	69.8014	112.687	75.7039	78.8478	38.3249	31.0522	66.0882	105.126	54.5104	203.864	197.31	157.708
1.10.7	1000	179	114.812	127.116	23.8875	60.4878	70.0043	46.0345	40.4813	0.019852	2.28759	28.3266	62.7637	89.8688	0.026411	2.24961	0.352667	0.015363	0.352149	118.957	160.646	111.472	111.53	70.9399	55.1084	80.8859	90.3231	54.5731	213.175	202.297	167.259
1.10.7	1000	180	146.884	132.952	29.2997	60.8918	57.073	44.1828	34.9699	0.029296	1.43127	30.8135	64.6344	67.6504	0.054648	0.173521	0.03831	0.016056	0.114085	112.559	154.034	104.326	110.603	66.7228	51.2017	75.1941	74.7944	45.7507	198.813	184.087	148.823
1.10.7	1000	181	18.4399	28.3114	0.210269	24.9754	77.7782	21.0137	29.2483	0.001171	0.071261	9.86158	37.6164	128.755	3.56306	26.8397	3.3729	0.227255	0.074385	123.394	161.39	117.817	120.664	74.6472	60.1084	108.597	152.24	89.4147	229.541	224.775	195.683
1.10.7	1000	182	14.3386	13.4893	0.07658	0.238931	2.32247	0.045391	0.013645	0.000278	0.000278	0.002228	0.931495	0.216931	0.119187	0.07658	0.109719	18.8583	0.659705	74.5146	106.845	72.6953	66.1601	37.8493	30.1378	56.0382	98.3033	50.7288	217.982	210.74	176.109
1.10.7	1000	183	10.7579	9.63899	0.077797	0.403846	0.423077	0.003497	0.04021	0	0	0.218531	0.289336	0.534965	0.442308	0.024476	0.286713	4.02622	0.350524	2.54021	17.0629	14.2395	21.7526	6.125	9.34703	24.3698	36.0358	23.4921	33.1582	39.2273	43.0376
1.10.7	1000	184	79.3762	80.6636	0.610478	19.3068	29.9043	10.295	10.0482	0.023918	0.039104	2.51594	28.6215	43.6944	3.99317	0.5	0.602126	0.302961	0.08694	95.7828	134.913	94.7111	147.974	75.9617	59.1948	142.247	135.876	79.721	214.113	199.281	164.655
1.10.7	1000	185	63.6214	46.5596	0.041163	12.3541	35.9817	7.04508	11.9552	0.015681	0.008494	0.445279	23.6266	48.7155	0.176413	0.119895	3.55113	0.119895	107.801	77.8357	119.533	80.6972	86.5799	40.229	32.6844	73.6707	105.301	54.639	204.325	196.329	157.847
1.10.7	1000	186	25.5759	34.6106	0.004923	0.249954	52.3077	3.22151	19.0932	0.002735	0.001641	0.008569	20.5783	19.8088	0.285506	1.7072	16.1723	0.619325	43.5849	93.6252	136.442	96.7701	83.5305	58.5646	48.2733	77.9415	147.714	81.862	231.936	230.183	207.234
1.10.7	1000	187	83.7902	93.0215	1.36743	24.554	43.8669	15.822	17.3622	0.025724	0.023901	3.73587	33.0468	41.5534	1.41159	0.109176	1.85254	0.083857	2.13632	110.579	149.07	103.443	116.162	68.4823	52.8453	95.8307	116.805	66.4626	216.631	207.958	172.468
1.10.7	1000	188	153.862	151.82	14.5154	55.3363	92.5599	51.8555	52.4143	0.071753	2.7491	27.1978	61.2951	113.985	0.192298	14.8921	2.07845	0.015786	1.74049	144.681	182.09	132.056	130.416	89.1425	69.3181	99.1913	112.135	69.591	227.374	220.366	190.943
1.10.7	1000	189	15.3368	10.6887	0.062406	0.157143	0.33985	0.000752	0.024812	0.000752	0.001504	0.024812	0.162406	0.072932	0.485714	0	0.153383	71.9083	1.14662	125.519	142.18	100.159	103.264	66.6669	50.9444	84.7286	98.3053	57.6496	200.355	182.062	144.804
1.10.7	1000	190	17.2562	19.1577	0.248315	1.15664	2.85317	0.069371	0.089349	0.001471	0.000613	0.088859	4.1646	2.97132	0.677044	0.020591	0.333252	1.82853	2.04277	63.5312	95.2221	62.9618	94.5544	41.3817	31.1841	81.7429	98.0637	50.3136	182.567	169.248	128.939
1.10.7	1000	191	9.00877	4.14098	0	0	0	0	0	0	0	0	0	0	0	0	0	0.003625	0	7.5538	26.6648	18.1461	13.4218	12.1963	9.13411	13.7131	14.2543	11.7865	15.9798	15.8018	13.0109
1.10.7	1000	192	104.04	112.382	25.245	56.429	54.5112	37.2647	29.625	0.01344	1.11706	25.7858	58.3826	49.4945	0.069586	0.040754	0.099285	0.045307	0.199653	114.786	156.313	107.41	109.915	68.9365	53.2179	77.015	83.7455	51.4416	205.77	194.191	158.964
1.10.7	1000	193	12.4837	12.7137	0.062717	0.391244	0.304031	0.018937	0.011466	0.000174	0.000174	0.084434	0.420605	0.411223	0.358756	0.005386	0.399236	3.3075	0.63968	28.3612	56.8405	36.6294	51.2067	18.6553	14.9065	39.766	59.6392	29.3273	120.199	115.726	83.6553
1.10.7	1000	194	9.80814	4.56091	0	0	0	0	0	0	0	0	0	0	0	0.001193	0	0.000682	0	8.54711	30.8109	19.305	17.0242	10.2196	9.90918	13.8439	13.7148	11.6635	18.0123	16.3004	17.7057
1.10.7	1000	195	7.4346	3.89454	0	0	0	0	0	0	0	0	0	0	0	0	0	0.00628	0	7.90342	21.4495	14.3218	12.9207	13.3839	10.1864	11.9593	11.7142	9.12386	15.3506	13.6906	12.5812
1.10.7	1000	196	112.858	118.42	6.1108	41.2126	67.7497	32.0202	33.5754	0.030371	0.692913	16.5821	46.4758	73.9033	3.34758	5.75759	2.04443	0.667604	0.318335	121.011	151.038	107.312	157.505	93.5844	72.1159	143.776	143.061	87.3825	224.896	211.57	179.288
1.10.7	1000	197	251.926	226.572	8.5044	48.2884	99.8892	49.3684	55.697	0.100528	1.8558	26.2315	56.9977	124.013	1.00264	16.7972	0.697245	0.031946	0.771688	169.402	201.069	152.2	148.533	109.878	85.7321	110.902	118.265	77.7693	231.677	226.093	201.741
1.10.7	1000	198	250.686	181.992	3.21004	32.1693	57.1781	23.9628	27.8113	0.018432	0.024473	10.8209	38.4085	32.1163	0.054368	0.127478	0.36741	0.220725	0.398854	145.534	179.89	129.531	137.32	93.1981	71.2351	101.192	106.253	67.1865	223.522	214.006	181.888
1.10.7	1000	199	24.6894	34.4709	0.024264	1.8827	63.1647	11.1088	27.0614	0.009371	0.002343	0.294679	28.8029	53.0524	0.35994	5.62768	24.9188	0.218206	106.003	74.0743	115.24	78.4577	74.3307	42.2922	35.7239	67.3149	133.932	70.1841	226.429	224.115	195.26
1.10.7	1000	200	208.826	108.176	13.3159	59.779	97.3526	60.2409	56.0036	0.476266	6.43718	31.8636	63.1137	153.97	0.810929	30.5485	5.48624	0.039888	2.43678	128.867	170.604	123.016	107.836	76.4196	61.0247	86.3714	117.531	71.0499	227.414	221.899	192.464
1.10.7	1000	201	26.0977	31.9812	0.196602	3.63956	65.6572	8.36468	25.378	0.340413	0.007282	1.27973	24.6341	38.747	1.75425	6.89199	27.4114	2.67961	99.716	50.6924	79.8167	48.9545	72.3805	22.446	17.7027	55.1808	91.7809	41.088	188.404	175.194	133.189
1.10.7	1000	202	15.1108	17.1384	0.384409	0.71659	7.9856	0.063748	0.115591	0.00096	0.005376	0.008065	2.89631	0.770545	0.301075	0.00576	0.078341	31.4814	1.14881	78.4881	110.256	75.4343	92.6192	50.8301	39.4558	82.4418	118.413	63.2608	207.684	199.844	160.551
1.10.7	1000	203	16.982	18.2124	0.142157	1.31336	2.81264	0.065541	0.195715	0.000545	0.000545	0.111656	3.68046	3.04684	0.715686	0.039579	0.534314	2.11456	3.22331	45.3951	75.2015	46.6578	78.5951	24.7807	17.778	61.6189	73.2578	33.4804	161.072	144.193	104.777
1.10.7	1000	204	10.4155	8.625	0.002315	0.041667	0.074846	0	0	0	0	0	0.000386	0	0	0	0.003472	250.657	41.4803	150.845	163.475	123.481	126.556	91.6454	73.0999	102.782	111.123	71.7901	203.478	184.503	156.444
1.10.7	1000	205	107.449	53.8907	0.317839	28.038	58.5229	21.4064	25.5016	0.024183	0.036746	5.58951	35.4617	95.864	1.67556	3.82004	3.62154	0.038003	4.00314	105.662	148.249	104.106	95.2513	59.4692	47.4384	83.3634	119.639	67.6888	219.195	213.464	178.634
1.10.7	1000	206	7.74971	3.98775	0.000168	0	0	0	0	0	0	0.000671	0.017458	0.001007	0.000336	0	0.106765	0.035421	0.015444	4.99731	13.1949	9.72939	14.5798	11.488	9.10945	12.4046	13.0844	8.99916	11.9122	9.55531	9.0653
1.10.7	1000	207	0.009612	1.77708	0	0	0	0	0	0	0	0.00037	0	0	0.017006	0	0	0.008503	0	7.06617	15.3704	10.4274	13.9867	10.6473	11.3911	12.4503	12.0488	9.76266	13.5527	12.922	11.2643
1.10.7	1000	208	52.6019	44.413	0.149513	2.99915	2.27022	0.336722	0.314697	0.019907	0.013554	0.095722	8.07793	7.4244	1.86065	0.175773	0.044896	0.202457	0.056756	43.346	81.6794	52.5781	108.095	34.4943	27.1449	109.058	99.7755	50.8052	169.305	147.861	111.712
1.10.7	1000	209	8.98648	5.83727	0.001717	0.016101	0.001073	0	0	0	0.000215	0.001288	0.025977	0.015243	0.041219	0	0.101116	80.3813	0.09854	4.44697	16.3383	11.3295	14.5554	5.98175	5.69386	10.0206	13.9116	7.72928	17.1015	16.0266	14.9575
1.10.7	1000	210	15.6942	21.3274	0.148477	2.31282	13.3896	1.30711	3.32043	0.001904	0.038071	0.302665	9.53871	25.7513	4.51586	1.78617	0.195431	0.306472	0.007614	81.8128	115.638	87.9055	124.524	66.1961	60.2582	137.329	142.241	90.7246	144.383	137.975	118.212
1.10.7	1000	211	58.4208	64.7331	36.3145	67.7377	82.0096	52.1286	44.479	0.192253	4.14286	30.3735	62.6987	80.7036	0.735963	9.90689	6.64677	0.134328	5.34328	90.3721	133.852	92.2651	89.586	54.2189	43.8276	76.6254	113.45	63.3198	218.8	211.484	176.756
1.10.7	1000	212	10.8925	3.52485	0	0	0	0	0.000478	0	0	0	0	0	0	0	0	0.01075	0	8.27281	31.8383	19.9866	16.2317	6.87817	7.17224	12.7076	11.7403	8.29694	17.2052	12.7441	10.6519
1.10.7	1000	213	201.129	161.395	25.8334	62.08	76.9738	54.4924	47.4899	0.062852	3.7221	32.6773	65.8625	93.9495	0.081172	3.18912	0.345547	0.014656	0.678129	135.651	173.991	123.358	126.138	84.6443	65.1604	92.1017	97.9535	61.0753	218.538	208.247	175.463
1.10.7	1000	214	11.879	11.1164	0.00692	0.141971	0.527559	0.022906	0.033644	0.000477	0	0.047244	0.900024	1.78454	1.66142	0.026963	0.009306	0.027201	0.01193	34.199	55.7843	28.5906	110.901	28.1823	14.5734	113.923	84.4307	32.8425	137.563	92.4543	52.8394
1.10.7	1000	215	81.3349	11.4242	0.011079	0.144349	0.023425	0.017411	0.008547	0.00823	0.007281	0.002849	0.059513	0.033555	0.025958	0.003482	0.201013	0.855967	0.195632	21.8689	48.3992	31.5676	33.9972	17.8791	14.8788	24.5695	27.6205	16.9867	51.9896	46.5176	36.1722
1.10.7	1000	216	17.0158	16.9636	0.041067	0.523434	8.19466	0.02529	0.068677	0.00116	0.006265	0.00348	1.45174	0.414849	0.184223	0.074478	0.067517	68.5745	1.64524	101.934	132.485	94.035	101.964	62.8949	49.6394	92.6965	129.694	72.3244	225.393	218.923	187.934
1.10.7	1000	217	177.774	204.013	0.165577	9.13682	34.0346	4.7549	11.1928	0.015904	0.024837	0.769281	24.1091	17.1717	0.863399	0.012418	1.00501	0.4878	6.29216	152.207	183.684	131.41	150.411	98.2684	73.4852	116.817	114.625	70.9702	224.566	214.701	183.062
1.10.7	1000	218	122.249	96.8047	14.3597	58.0366	76.1142	50.7601	44.6911	0.022051	3.0647	26.7961	59.7635	122.031	0.265446	11.6376	2.5958	0.016018	1.35906	108.579	152.817	106.64	95.9413	62.7377	50.2977	75.928	102.415	59.8808	217.712	210.128	175.568
1.10.7	1000	219	7.78113	4.01069	0.000172	0	0	0	0	0	0	0.00138	0.000172	0	0	0.00207	0.000517	0.004312	0	4.98206	12.9652	9.891	13.2154	12.2601	9.00586	12.5597	11.3865	11.5247	14.7133	12.5911	10.1099
1.10.7	1000	220	168.972	96.8582	4.27961	42.1988	83.7478	43.4331	44.8993	0.129131	1.2791	18.4387	47.968	106.732	3.58109	17.5572	4.51601	0.760549	5.68632	130.638	167.651	121.214	124.346	83.6645	65.5358	106.433	134.006	80.939	227.517	221.469	191.575
1.10.7	1000	221	18.8316	21.8804	0.187645	1.65792	9.02292	0.127864	0.212388	0.001661	0.00083	0.051976	7.91199	3.07107	0.758718	0.006974	0.350382	2.69728	4.74444	49.6619	86.58	57.0219	65.1576	25.2577	21.2733	53.5237	96.6619	47.7154	188.771	183.91	143.998
1.10.7	1000	222	11.6395	9.67859	0.064657	0.052183	0.216008	0.001663	0.002911	0	0	0.011019	0.056965	0.000416	0.01684	0.010811	0.015593	245.331	26.2759	92.7318	119.275	81.7083	87.3867	47.005	36.3183	70.7472	89.0291	48.5464	205.849	191.814	156.651
1.10.7	1000	223	57.1635	10.4505	0.018619	0.084469	0.014986	0.004087	0.004995	0.00772	0.002725	0.004995	0.037239	0.071753	0.044051	0.004541	0.257947	0.652134	0.077203	11.6589	35.2112	23.599	24.2443	11.9882	10.9673	18.485	18.594	12.153	32.366	27.7602	23.9101
1.10.7	1000	224	22.8569	22.9695	0.037086	0.812609	6.33704	0.077225	0.673429	0.002182	0.001963	0.065227	6.92343	6.6719	0.251091	0.039049	2.38329	3.9014	49.7428	49.8414	84.9863	54.954	74.6974	26.6571	21.0829	59.4034	83.7005	40.748	172.682	162.444	124.132
1.10.7	1000	225	16.1437	23.1018	0.362772	2.53732	14.7408	0.834492	1.47659	0.001391	0.316412	0.33032	10.8382	9.12912	1.23551	0.213723	0.166435	1.36208	1.56096	83.5035	122.736	87.4634	119.496	62.9022	50.7123	113.298	135.604	77.656	214.525	207.084	170.754
1.10.7	1000	226	11.0533	3.73708	0	0	0	0	0	0	0	0	0	0	0.000791	0	0	0.028745	0	6.56619	30.8705	18.2318	11.8753	6.88528	5.87526	14.0079	12.8012	9.43882	15.5042	13.3167	9.94699
1.10.7	1000	227	16.1688	22.7114	1.55974	4.31397	27.3197	2.02591	3.39143	0.001091	0.000273	0.208674	17.2087	24.4288	6.90016	0.239498	0.624386	2.74495	4.15685	44.8486	78.4973	51.3592	68.9523	27.377	22.4945	57.2962	106.71	52.3074	195.404	191.185	149.342
1.10.7	1000	228	18.9682	29.1019	1.05915	24.5193	88.6085	27.6212	37.0335	0.401709	0.066325	9.27111	36.9316	66.0499	1.4482	19.6294	5.51658	2.33367	1.47761	83.6626	116.448	78.4513	116.223	56.2841	44.0974	105.517	128.229	69.0198	217.82	204.361	164.599
1.10.7	1000	229	10.3699	7.31728	0.028565	0.134089	0.06067	0.004958	0.00661	0	0	0.023843	0.078612	0.017705	0.008971	0.008026	0.051464	122.263	0.631492	23.4112	43.5441	28.1889	44.5701	21.7365	17.2684	34.805	40.0788	21.4606	48.3829	44.7528	35.5215
1.10.7	1000	230	10.4776	4.30769	0	0	0	0	0	0	0	0	0	0	0.000424	0.000424	0	0.012079	0	6.19792	29.8898	19.2174	16.3011	7.55181	8.06145	15.5861	14.0958	10.0214	17.7942	15.2568	13.1975
1.10.7	1000	231	25.2289	29.2681	0.112332	5.82252	70.1485	17.9064	29.1026	0.130804	0.003495	3.92861	27.1917	48.332	8.83625	9.47654	15.1663	16.6555	241.543	85.4391	119.103	83.6013	102.124	58.646	47.8045	100.636	153.188	85.199	227.663	223.889	193.815
1.10.7	1000	232	25.9609	36.6537	0.079939	2.29825	67.8204	13.4732	30.6006	0.004882	0.001068	0.522044	30.1356	54.3686	0.283295	7.97346	59.8032	0.129214	179.433	86.625	127.085	88.3248	81.4223	51.5532	42.6339	75.0284	140.8	75.8703	229.965	227.46	201.24
1.10.7	1000	233	252.881	187.469	2.61698	39.3165	57.9779	31.9698	32.428	0.015952	0.038079	15.6333	45.3907	75.9585	0.170669	0.219726	0.609777	0.12247	0.691424	139.417	175.676	124.026	131.55	89.3024	67.97	96.3671	97.6249	61.5683	217.087	205.524	172.159
1.10.7	1000	234	8.294	4.34813	0	0	0	0	0	0.002785	0	0.000696	0	0.000522	0	0	0.002089	0.039164	0.002437	8.64474	16.6091	10.5504	14.8343	11.3643	9.65152	13.9285	12.764	10.2087	18.0623	15.6218	13.9076
1.10.7	1000	235	25.4755	25.3986	0.030081	0.841224	11.2634	0.338216	1.89354	0.004447	0.002354	0.030081	9.34659	8.14413	0.482867	0.017002	12.0787	6.16165	142.516	50.3837	85.7125	56.4839	70.5668	27.3136	22.385	56.3699	91.8381	45.2992	185.528	178.355	139.346
1.10.7	1000	236	236.806	68.5528	0.040103	17.2896	31.1353	5.30933	8.45169	0.029081	0.035882	0.475375	22.753	47.6081	0.784475	0.070122	3.31496	0.070591	3.65549	88.728	132.238	89.7561	79.2819	47.1008	38.2216	64.8616	98.9974	53.8921	201.448	194.141	155.704
1.10.7	1000	237	63.4114	56.2731	10.3698	47.645	82.3804	44.964	46.5533	0.11362	1.4686	20.2428	53.5935	125.855	1.52152	21.7735	6.39308	0.431898	110.548	99.1778	143.281	100.418	95.3959	58.5483	47.2879	84.067	123.709	69.211	224.289	219.105	186.934
1.10.7	1000	238	7.60049	3.96889	0	0	0	0	0	0	0.020467	0	0	0	0	0	0	0.005526	0	6.38969	22.4288	15.5551	14.0004	10.4894	6.57736	12.0061	11.5403	9.09067	14.4855	13.5383	11.0546
1.10.7	1000	239	247.01	93.3479	0.021282	17.8238	35.7149	5.65281	10.1195	0.024499	0.042316	0.953724	25.2591	56.7902	0.919327	0.079436	1.73893	0.0537	2.37293	117.502	155.62	107.014	105.851	67.5739	51.5108	84.4323	106.343	61.2252	210.572	201.858	164.774
1.10.7	1000	240	90.5621	33.4633	0.114329	2.33885	2.66642	0.069575	0.079165	0.022001	0.019556	0.031967	5.09158	5.33941	0.78601	0.022001	0.689921	1.88699	2.80293	68.4349	107.668	71.8165	75.8665	35.4071	28.6933	63.3791	87.0006	45.7234	174.395	165.052	126.978
1.10.7	1000	241	242.215	186.957	0.005585	2.94485	17.4366	2.21571	4.79127	0.024433	0.01815	0.246771	15.4747	9.50157	0.568586	0.05829	5.12845	2.36754	148.123	116.372	149.712	101.481	120.3	72.444	54.793	88.4642	96.7169	57.1627	210.099	197.296	161.42
1.10.7	1000	242	9.08518	4.28598	0	0.000265	0	0	0	0	0	0	0	0	0	0.000529	0	0.112169	0	8.34153	25.5204	17.7418	17.1376	12.4852	11.5696	14.2355	14.4984	11.2635	18.4066	19.3392	17.5884
1.10.7	1000	243	24.811	26.6469	0.192808	2.04208	19.0941	0.837796	2.55777	0.004208	0.008034	0.330528	9.7238	6.90015	1.69166	0.384086	1.13122	3.23489	7.36228	106.728	144.878	103.865	106.496	69.969	55.3191	96.7215	134.619	77.9594	222.795	217.831	184.342
1.10.7	1000	244	15.7645	13.4556	0.007897	0.026591	3.66946	0.007252	0.014988	0.001128	0	0.003223	0.124899	0.005963	0.035616	0.029976	0.000806	200.794	13.1104	114.564	143.498	102.615	97.2574	58.0047	45.9624	84.4595	122.836	67.7004	233.36	228.822	207.528
1.10.7	1000	245	194.882	114.484	7.62631	43.1033	44.4309	29.4705	24.3845	0.016628	0.138565	15.3177	46.4221	60.7599	0.01867	0.063886	0.263711	0.01196	0.20916	108.995	151.032	101.731	103.539	63.9317	48.6844	72.4154	78.0546	46.5443	198.95	186.087	149.702
1.10.7	1000	246	10.2919	3.95444	0	0	0	0	0	0	0	0	0	0	0	0	0	0.000229	0	7.16896	31.7353	18.5286	13.0302	9.64331	9.7951	14.9691	14.0261	11.8285	16.0902	13.0531	14.1385
1.10.7	1000	247	14.3664	16.6629	0.020513	0.931002	3.8345	0.514685	0.737063	0.001865	0.001865	0.155711	3.54452	8.61632	203.114	0.586014	0.759907	0.654079	0.837296	38.3021	68.7142	41.8065	123.969	37.1333	27.6266	130.402	118.445	59.7995	167.344	139.817	100.75
1.10.7	1000	248	97.7547	51.1272	0.169205	17.244	54.8785	15.2315	22.287	0.034518	0.022335	1.80947	28.0376	61.0142	3.37665	2.17496	3.07242	0.815905	7.98917	107.855	148.079	104.545	102.957	63.823	50.5445	93.7902	132.691	74.9489	220.744	215.549	181.858
1.10.7	1000	249	85.1727	40.9557	0.016269	17.5547	37.9167	7.38308	11.4421	0.014317	0.018655	0.439479	25.5234	69.7176	1.40629	0.189588	4.30542	0.02885	2.54664	87.7792	131.236	89.3779	83.3167	46.9406	37.9911	73.061	111.334	60.0443	207.691	201.661	163.28
1.10.7	1000	250	19.4768	20.282	0.000822	0.302096	10.3411	0.316893	1.07069	0.00411	0.002877	0.15372	4.933	1.72133	1.51336	0.059186	2.84998	69.1291	165.882	67.469	97.0699	65.6658	81.3469	39.4932	30.9967	70.476	110.957	56.6716	201.011	194.164	153.904
1.10.7	1000	251	0.003221	1.46349	0	0	0	0	0	0	0.03078	0.029707	0	0	0.014316	0	0	0.006442	0	6.90086	17.1056	13.0651	16.0812	11.6578	8.53221	11.8078	11.6249	8.73694	14.6435	13.4134	11.6188
1.10.7	1000	252	14.2901	12.8995	0	0.32048	1.75095	0.067004	0.30847	0.000632	0.108091	0.001264	0.600506	1.43173	1	0.196587	0.151707	0.295196	0.060683	3.09102	33.3793	20.5809	14.6776	2.43553	3.20986	13.2775	23.897	10.89	20.9254	22.8673	20.8293
1.10.7	1000	253	123.013	86.9308	1.72281	9.88983	34.1907	4.83439	7.46222	0.019421	0.018715	1.57239	16.1208	11.1843	0.724929	0.254237	0.35452	101.014	13.666	117.807	151.724	107.415	121.114	74.5441	58.5731	102.955	133.99	77.5166	229.876	224.046	198.346
1.10.7	1000	254	7.83625	4.03601	0	0	0	0	0	0	0	0.032614	0	0	0.001699	0	0.01308	0.181417	0.000849	3.60387	11.1017	7.95736	11.6013	7.70324	6.40224	10.8276	10.2213	8.00408	12.629	10.647	9.99473
1.10.7	1000	255	145.973	153.331	0.030707	7.23381	90.6807	21.1909	43.5176	0.311876	0.032926	4.1195	40.478	66.3452	0.149094	22.7503	47.8846	0.024047	120.973	133.411	170.962	121.214	115.337	79.5535	62.5549	91.1861	137.969	79.9604	234.001	231.35	210.768
1.10.7	1000	256	8.706	3.85777	0	0	0	0	0	0	0	0	0	0	0	0	0	0.020858	0	7.59376	24.1756	16.204	13.0656	10.1996	9.78168	13.0824	10.713	9.97318	18.0795	16.9213	14.3768
1.10.7	1000	257	240.841	66.8643	0.179691	5.72859	18.3879	0.839027	2.63266	0.027609	0.026205	0.093121	9.19467	10.1095	1.54937	0.038839	0.973327	5.83014	5.3037	137.897	167.292	118.832	123.058	82.2522	63.0898	103.159	119.666	73.3168	215.541	205.522	169.803
1.10.7	1000	258	16.1033	22.565	0.143181	7.68827	26.4952	3.3865	7.24921	0.001812	0.003172	1.43996	17.8944	48.8265	2.92614	1.65791	1.48256	0.104667	0.053013	20.1441	49.1654	26.3879	95.4744	15.0734	11.3525	95.85	81.5782	32.966	141.435	107.128	73.0304
1.10.7	1000	259	14.8586	24.9707	0.437879	18.3106	62.4131	14.9101	21.9419	0.007576	0.011616	4.99899	29.0652	56.0646	5.00152	5.59091	2.95505	0.349495	0.181313	83.7515	100.912	58.0328	137.985	52.6813	35.8066	130.119	122.403	59.747	206.718	173.121	118.705
1.10.7	1000	260	247.753	74.6668	0.060196	5.25338	3.36709	0.154767	0.1627	0.029709	0.025976	0.064862	6.21761	4.9804	0.240939	0.023487	0.346555	0.498522	2.87463	84.8757	123.927	83.1625	82.8645	48.7172	38.3613	63.3984	78.8157	45.0904	175.071	162.914	126.66
1.10.7	1000	261	11.9851	12.5554	0.000408	0.089238	0.326322	0.075761	0.048193	0.000204	0.000613	0.005309	0.657341	1.34715	2.71166	0.003267	0.002655	0.007351	0.002042	49.6755	74.4517	44.0086	140.772	51.4817	35.8129	151.24	125.604	64.0958	171.683	136.803	93.9265
1.10.7	1000	262	59.8413	63.1339	0.996032	57.1964	206.866	108.89	128.795	44.2847	19.6548	30.7986	58.0774	92.4296	7.95139	88.5496	6.125	3.37698	12.1488	128.072	178.266	130.928	109.72	91.1438	76.9246	101.047	155.019	97.5188	230.581	226.63	200.605
1.10.7	1000	263	74.5945	48.5141	0.287867	14.08	16.6505	2.09815	2.21658	0.017581	0.015456	0.189142	18.7809	22.5435	0.590997	0.025309	2.32921	0.358964	2.35993	64.9111	109.07	72.9096	68.705	32.8352	27.4498	54.2714	86.4104	44.8827	188.007	180.581	141.522
1.10.7	1000	264	105.552	106.123	31.9186	62.3141	58.3465	42.8296	33.6497	0.042589	2.47871	29.8528	63.9492	72.429	0.067802	0.610903	0.26201	0.019421	0.354344	98.3615	141.555	94.6651	97.3993	55.1612	42.7717	66.7411	74.4484	43.198	196.866	183.334	146.85
1.10.7	1000	265	10.3906	10.6009	0.003219	0.188841	0.003219	0	0	0	0	0.003219	0.001073	0	0	0.001073	0.01073	250.591	54.5558	111.902	126.968	95.5451	131.499	93.8906	76.1674	108.932	114.102	74.6663	144.937	128.603	107.54
1.10.7	1000	266	18.4392	24.5944	86.6674	62.2625	35.5043	15.9163	8.42346	0.02289	0.165951	12.5894	35.5522	18.3226	21.5	3.65022	3.40486	10.5172	3.38984	54.7983	87.3119	58.2182	77.0601	34.0615	27.8491	61.3977	94.1767	48.5122	187.885	177.29	137.024
1.10.7	1000	267	10.8512	5.00566	0	0	0.003936	0	0	0	0	0	0.000246	0	0.00123	0.000984	0	0.037638	0	9.0214	30.2344	18.0015	17.5828	11.2829	7.19779	14.0251	13.5038	7.7417	20.8246	18.6111	14.603
1.10.7	1000	268	27.5886	27.9603	0.048846	8.87627	27.6113	2.83255	5.87694	0.003373	0.005937	0.081096	18.0105	37.2751	0.642693	0.017002	2.16017	0.345028	1.95439	83.0725	122.443	83.4066	88.1131	46.8938	36.8258	78.0084	116.603	61.9737	205.226	199.44	160.687
1.10.7	1000	269	193.893	143.358	3.92103	40.4903	52.922	29.0674	27.5519	0.01598	0.041686	14.2957	44.2795	55.7897	0.036823	0.187124	0.551181	0.040528	0.411302	128.752	167.048	116.391	121.399	78.1116	59.6276	88.9009	95.0183	57.749	215.182	204.26	169.542
1.10.7	1000	270	13.1766	12.062	0.024427	0.237129	0.570462	0.040962	0.119128	0	0.010898	0.060504	0.219842	0.906802	1.33672	0.009019	0.048854	0.576475	0.147313	4.97294	36.6539	21.8952	26.4483	4.47914	4.51522	26.2165	36.3878	15.8952	40.8286	43.1067	34.1526
1.10.7	1000	271	114.125	135.894	15.3577	55.2552	90.9678	45.8147	46.5465	0.080724	2.68893	26.5273	59.1376	88.5908	0.21248	9.8817	1.57179	0.104384	0.960102	148.586	183.515	134.106	134.759	93.9719	73.3723	103.156	119.416	74.6541	229.261	222.658	194.114
1.10.7	1000	272	92.0774	47.0771	0.220399	32.3707	55.3231	21.7245	23.6591	0.020399	0.049941	6.67761	38.4359	109.641	0.84619	2.70106	3.16999	0.010317	2.43048	86.2879	132.88	90.8267	75.8528	45.6129	38.056	65.2914	104.116	57.1662	212.918	206.396	168.978
1.10.7	1000	273	8.01643	4.02933	0	0	0	0	0	0	0.01373	0	0	0	0	0	0	0.01165	0	10.1951	24.7391	15.4113	14.1015	11.2804	7.66299	13.3374	12.9033	9.21968	16.0607	14.3961	12.0634
1.10.7	1000	274	233.456	97.8974	0.003651	5.01128	25.5914	2.42781	6.3913	0.030202	0.030202	0.116827	16.0704	21.9383	1.15466	0.03684	5.89479	1.15566	114.644	102.026	140.206	96.4441	98.9877	58.0299	45.6973	80.994	107.944	60.2771	209.528	201.013	165
1.10.7	1000	275	9.52417	4.28689	0	0.002111	0	0	0	0	0	0.000844	0	0	0	0.001478	0	0.006966	0	7.08592	28.5535	17.5723	17.9263	10.9489	12.3137	14.3654	13.3409	9.82352	19.623	15.5005	15.7317
1.10.7	1000	276	137.906	157.24	12.3321	47.4402	65.7018	32.8353	32.2942	0.018768	0.381611	19.579	50.9316	52.2068	0.097441	0.268626	0.738578	0.015735	0.39109	149.384	182.635	132.361	142.793	98.1448	75.625	108.522	112.893	71.7418	224.298	215.212	184.191
1.10.7	1000	277	17.0847	13.7876	0.095628	0.492486	1.70833	0.007514	0.020492	0.002049	0.000683	0.05123	0.269809	0.138661	0.001366	0.000683	0.180328	117.258	3.24659	140.421	158.357	116.667	122.924	83.1141	65.138	107.427	127.117	76.7022	222.143	210.676	180.497
1.10.7	1000	278	10.0586	3.62582	0	0	0	0	0	0	0	0	0	0	0	0	0	0	0	7.27448	30.2378	17.4976	13.596	10.1557	12.1566	12.6561	12.1181	8.72661	18.5551	14.8935	11.7308
1.10.7	1000	279	30.3015	33.6651	0.14427	11.9798	46.1275	9.98023	16.9716	0.006457	0.001816	0.815375	25.4364	53.1146	0.341404	0.326069	3.34605	0.372276	106.477	80.3545	120.653	81.9661	93.6416	45.4031	36.1235	83.4153	119.263	62.5783	214.211	207.311	170.286
1.10.7	1000	280	251.363	161.295	0.686323	17.4438	41.1878	7.91047	14.3	0.022795	0.023456	1.74199	26.0031	22.2194	0.571523	0.027915	0.73406	0.666336	0.834985	133.544	170.434	120.867	124.27	82.7208	63.4784	92.9409	104.443	64.1123	219.546	210.19	176.307
1.10.7	1000	281	9.94785	3.66238	0	0	0	0	0	0	0.003396	0	0	0	0	0	0	0	0	6.16541	27.554	17.0352	16.3781	12.4511	8.22532	13.1154	12.1967	9.15304	15.9217	12.016	11.0325
1.10.7	1000	282	23.3261	34.5578	0.186316	1.8879	57.9635	10.5745	25.2797	0.001114	0.001783	0.382438	27.9926	46.8812	0.075329	4.77022	141.497	0.152663	157.495	74.5623	115.03	78.2908	71.682	40.7736	34.5404	62.3076	127.992	66.862	225.46	222.365	192.758
1.10.7	1000	283	137.135	145.129	1.27845	25.7052	34.1834	11.521	12.9115	0.021485	0.018294	3.91619	32.9338	32.9511	0.345671	0.022761	1.23591	0.08445	1.37056	119.417	155.854	106.372	121.234	71.4576	53.7994	91.2089	96.7349	56.4582	209.079	196.547	160.22
1.10.7	1000	284	47.347	32.2804	0.235681	2.46192	7.69739	0.108602	0.227058	0.006775	0.006569	0.020735	7.77746	2.67789	0.779717	0.024225	0.420448	2.40218	2.32889	57.3636	95.6428	64.0719	78.505	33.7933	27.2802	65.9372	97.8271	49.9154	188.109	180.758	141.234
1.10.7	1000	285	12.7359	14.5583	0.001714	0.072194	0.452014	0.01671	0.05377	0.0015	0.000214	0.002356	0.824336	1.40553	2.21701	0.012853	0.011568	0.013496	0.003856	20.0381	57.1416	36.1283	99.6238	26.0818	23.5628	115.237	105.377	56.777	132.873	116.397	89.1191
1.10.7	1000	286	12.9908	12.1474	0.037521	0.144054	0.356951	0.017085	0.014573	0.001675	0.00067	0.013065	0.349079	0.136013	0.00536	0.004858	0.066834	56.8023	2.2526	45.1908	71.9739	46.9476	66.8998	24.7434	18.9007	54.7784	71.769	35.3571	149.928	138.687	103.41
1.10.7	1000	287	250.24	249.399	3.19335	22.6942	69.7864	22.2182	35.4732	0.019166	0.03044	9.08935	37.4414	52.0369	0.681511	2.00225	3.37317	4.05468	7.79087	185.664	208.512	159.132	182.085	136.067	105.099	144.308	135.368	92.2539	234.158	228.132	205.875
1.10.7	1000	288	8.94609	5.59649	0.020385	0.009526	0.000572	0	0	0	0.000191	0.005334	0.008764	0.035435	0.011812	0	0.530006	41.6315	0.255858	3.502	14.1617	10.0833	12.0869	4.98438	4.90265	8.14669	10.694	6.21528	14.9282	13.4353	12.6716
1.10.7	1000	289	104.009	45.2493	0.630023	6.78177	19.368	0.898399	2.33322	0.018458	0.017315	0.040346	11.8742	7.53006	1.24779	0.020908	0.769193	3.50294	3.06534	79.9084	119.429	81.7128	86.3494	47.8171	38.0289	75.5593	114.341	61.264	207.374	201.083	163.003
1.10.7	1000	290	20.9997	12.5555	0.009621	0.426608	0.368609	0.018142	0.072018	0.000825	0.029137	0.336174	0.26608	0.616273	0.320231	0.008521	0.927982	5.94585	0.581363	61.9984	94.0957	64.9959	69.9241	40.3364	32.5833	55.699	66.0528	39.7875	112.244	106.909	84.171
1.10.7	1000	291	249.322	165.091	0.289538	6.70925	20.2914	1.11395	2.90998	0.017843	0.021492	0.189376	14.4625	5.70073	1.34874	0.014396	0.383009	4.62652	4.41748	114.447	151.924	106.267	115.026	73.2958	56.9011	89.8005	108.375	64.091	215.582	206.329	171.611
1.10.7	1000	292	133.726	143.146	1.60366	33.6843	71.1417	31.7453	36.8387	0.033627	0.125041	12.6379	45.5106	87.5586	1.40908	5.79758	7.20013	0.085864	5.37284	140.293	175.632	126.473	135.206	89.1117	69.0731	110.01	127.14	76.5919	227.496	220.785	190.875
1.10.7	1000	293	240.832	90.5011	1.82494	44.532	77.2151	34.5046	36.5195	0.03524	0.450801	18.2281	49.5407	142.613	0.496568	18.2416	2.84828	0.070252	1.72426	110.694	156.981	111.1	86.9398	62.4746	51.2199	71.5373	108.574	63.5011	222.919	217.146	184.521
1.10.7	1000	294	18.2601	19.8116	0.03673	0.325237	6.32228	0.131517	1.13803	0.00237	0	0.013626	4.39633	3.73934	0.275474	0.138626	3.02666	6.04265	46.6493	33.3791	62.6961	38.2956	67.487	16.7553	12.1019	48.7684	62.0255	27.0219	142.846	128.052	93.6937
1.10.7	1000	295	250.742	108.581	0.026089	30.0008	51.5393	14.5024	17.8362	0.023869	0.038857	5.38607	36.7827	103.717	0.16181	0.761588	2.25423	0.026089	0.462115	101.213	148.319	102.877	80.5687	56.0888	46.7213	63.4335	94.3175	55.0844	211.623	203.931	167.607
1.10.7	1000	296	13.6636	22.722	0.178988	7.28837	25.5746	5.17899	7.51881	0.000865	0.00562	1.61911	20.2235	37.3096	149.314	4.39991	2.19412	0.377	0.464332	111.492	139.791	102.1	166.687	93.9477	73.6736	168.362	172.756	106.346	224.665	212.891	178.946
1.10.7	1000	297	15.4335	17.8388	0.120583	0.541784	2.46971	0.152832	0.279024	0.001963	0.001122	0.017386	2.56141	3.64694	2.08974	0.06562	0.068704	0.336231	0.159563	75.5404	108.576	74.154	119.017	55.9663	44.4551	119.909	123.978	70.6082	181.375	165.858	126.19
1.10.7	1000	298	12.3909	9.16731	0.013805	0.078962	0.088625	0.001933	0.0127	0	0.022916	0.092766	0.057151	0.243788	0.954721	0.001657	0.023192	0.184428	0.004694	3.84401	26.6405	14.0008	20.8537	3.95997	2.36858	17.0641	17.8548	5.19878	29.4917	24.0077	16.7755
1.10.7	1000	299	23.2101	32.6028	2.043	40.3344	56.0279	30.0131	26.8233	0.004191	0.141035	9.96246	42.6237	83.959	0.749089	2.66454	10.5978	0.142675	1.68823	68.7895	113.489	76.3267	75.7593	37.0497	30.9519	63.0439	102.916	53.7839	208.299	201.556	162.632
1.10.7	1000	300	16.5453	13.1053	0.039079	0.044795	1.31063	0.004325	0.021162	0	0.000309	0.000154	0.168984	0.08511	0.094532	0.02595	0.05777	11.5833	0.075842	88.8397	122.328	84.6077	66.6061	44.7732	35.6165	55.9543	102.873	54.6247	230.969	226.128	200.407
1.10.7	1000	301	15.7178	13.5195	0.016429	0.259219	2.841	0.130522	0.024279	0	0.000183	0.002008	0.913655	0.076305	0.012596	0.004746	0.002921	51.2017	0.279299	81.2842	114.894	78.4772	67.7214	40.1789	31.5263	58.04	104.285	53.7924	227.032	221.359	192.601
1.10.7	1000	302	14.3324	15.3755	0.05787	0.412916	1.74811	0.056472	0.214425	0.000559	0.000839	0.055074	1.26894	2.82024	1.95219	0.055913	0.081633	0.360078	0.14118	58.5465	90.9813	61.5239	107.552	45.0137	36.463	112.502	112.05	62.468	150.876	135.301	101.43
1.10.7	1000	303	58.6808	50.642	1.2589	27.6169	63.5399	24.9941	30.3989	0.024419	0.023831	5.85672	37.6684	87.0147	0.321271	3.23007	3.67932	0.238011	125.693	95.0374	137.395	95.0971	97.6252	54.4919	43.4516	86.5352	122.222	66.6934	220.868	214.711	180.284
1.10.7	1000	304	11.7094	10.7716	0.005948	0.022869	0.078864	0.00082	0.003282	0.000103	0	0.000923	0.177315	0.317814	1.13281	0.002256	0.003692	0.023587	0.003897	27.0266	55.367	31.5971	97.6732	28.4068	18.9754	106.601	89.3851	41.2059	128.389	101.181	67.6471
1.10.7	1000	305	8.69407	7.07648	0.073725	0.04249	0.002067	0	0.00023	0	0	0.023886	0.00023	0.00023	0	0	0.103813	243.983	26.0632	8.83693	24.743	17.0616	34.506	19.6034	16.2288	30.0429	37.9182	21.0616	23.378	22.121	19.6677
1.10.7	1000	306	7.76804	4.00974	0	0	0	0	0	0	0	0	0	0	0	0	0.012346	0.049904	0	4.40532	12.859	12.4985	16.0829	9.4481	7.26952	10.8979	11.0642	7.95566	15.1419	11.4194	10.8412
1.10.7	1000	307	250.66	127.984	1.60081	37.3902	63.2913	33.9713	34.3921	0.026142	0.074369	14.273	43.8152	76.4471	0.104417	1.79582	0.461989	0.119291	0.967548	122.508	163.871	114.962	108.286	72.3163	56.3248	80.3962	99.6959	59.5051	218.962	210.987	177.477
1.10.7	1000	308	29.4037	32.5777	0.093608	11.4059	47.0357	10.8184	17.5141	0.004538	0.002463	0.651757	26.0224	57.6359	2.49216	0.688578	3.32192	0.644107	6.86801	84.3565	125.604	86.2821	93.5531	49.582	39.5821	87.0495	132.325	70.5846	218.34	213.713	177.894
1.10.7	1000	309	24.7381	23.1894	3.39935	7.26948	157.032	31.0173	67.4416	14.25	0.37987	7.20779	27.9383	42.8636	3.01191	69.4145	1.30411	74.8106	20.5346	90.5227	124.265	88.7619	106.115	65.7662	53.2478	96.5195	140.805	79.2262	228.89	223.286	195.772
1.10.7	1000	310	16.0591	28.5296	0.739305	24.8111	83.0025	26.4693	35.0887	0.045532	0.188056	10.7022	37.5104	89.431	4.05654	22.0688	4.19991	0.557814	0.305167	134.177	164.85	122.048	139.704	91.9716	72.1688	129.544	164.533	100.748	230.936	225.244	196.578
1.10.7	1000	311	100.329	87.8271	0.214799	7.55602	8.64693	2.0093	1.89471	0.027484	0.032135	0.372093	16.0034	13.6727	3.06723	0.049471	0.101057	0.685412	0.115856	79.2224	118.271	80.7848	135.829	63.6541	49.9197	132.174	120.151	69.1611	196.557	177.471	141.95
1.10.7	1000	312	137.462	101.067	6.76708	47.3408	58.4702	37.1223	32.6034	0.018092	0.416652	18.3936	49.2252	85.2918	0.109433	1.16406	0.864044	0.021605	0.880555	109.477	152.889	105.52	99.4182	63.2036	49.7186	75.7216	95.7878	55.9536	213.323	204.603	169.075
1.10.7	1000	313	11.966	14.7133	0.000314	0.307342	0.87502	0.025782	0.045905	0.000943	0.006917	0.004402	1.65477	2.15736	2.74925	0.003616	0.009432	0.000314	0.0011	42.0338	72.2258	42.8343	151.377	50.9376	36.6048	160.365	134.036	69.3558	191.777	159.26	115.935
1.10.7	1000	314	99.6608	104.781	5.99676	38.5	38.4055	21.8808	17.9489	0.013401	0.137246	10.3156	42.1731	43.2371	0.042283	0.027726	0.455176	0.01525	0.193854	105.323	148.114	99.8048	104.777	61.6379	47.1109	74.2091	79.8433	47.0672	199.582	187.019	150.227
1.10.7	1000	315	10.0471	3.50736	0	0.033137	0.125184	0.036082	0.055228	0	0	0	0.019882	0.083947	0.002209	0	0	0.42489	0	34.6804	58.2644	47.6281	15.556	9.53608	8.93299	12.5191	13.0633	9.63328	14.7113	13.5162	11.4941
1.10.7	1000	316	7.47435	3.7636	0	0	0	0	0	0	0	0.022652	0	0	0	0	0.009487	0.08364	0.000194	4.48674	16.8139	11.6887	12.4809	7.86428	7.72953	10.0368	10.5975	10.2083	13.351	12.3475	11.8014
1.10.7	1000	317	161.659	96.8201	1.58556	33.6199	55.0797	26.7835	26.0437	0.032014	0.194412	11.0407	40.1409	88.9494	2.67346	4.34284	2.26775	0.139115	0.544237	93.018	131.853	89.4267	131.097	66.9959	51.8882	123.286	129.221	73.3062	215.429	201.998	165.443
1.10.7	1000	318	14.9977	24.6283	18.4258	54.7756	35.8285	23.771	8.55006	0.03107	0.102417	42.8665	33.6122	223.806	35.42	28.71	5.56847	0.543153	1.13464	29.1956	57.3521	37.4005	63.3602	23.1991	20.9563	43.9171	71.4384	35.9586	152.381	139.465	104.024
1.10.7	1000	319	98.611	108.048	6.51543	46.1073	60.653	33.4208	31.0158	0.020538	0.296241	16.8037	49.6235	75.2415	0.027882	0.570202	0.581902	0.015061	0.939009	118.747	159.765	111.406	111.09	71.0314	55.4573	83.5213	98.874	58.8696	217.077	207.888	173.049
1.10.7	1000	320	10.1844	3.21363	0	0	0	0	0	0	0	0.001144	0	0	0	0	0	0.014867	0	8.54094	31.7608	19.7809	14.0723	10.8449	7.69167	12.4506	13.2813	9.54254	12.5878	12.3618	11.761
1.10.7	1000	321	7.89595	3.97294	0	0	0	0	0	0	0	0	0	0	0	0	0	0.002606	0	8.00221	23.0439	15.0738	13.4094	8.67482	11.6143	13.3348	12.6099	9.05994	16.3013	13.7223	11.5676
1.10.7	1000	322	14.3784	12.0387	0.000222	0.078667	0.747333	0.010222	0.021556	0	0	0.000889	0.091778	0.008444	0.008222	0.000889	0.025111	139.649	2.22711	121.454	144.081	103.178	97.8556	62.4358	48.8782	83.3978	111.992	63.3987	225.191	216.136	184.974
1.10.7	1000	323	250.365	130.9	0.107803	5.49163	16.8846	0.812215	2.42013	0.024777	0.020648	0.127364	12.8033	11.4075	0.828733	0.0213	0.38709	1.41513	3.5288	133.985	165.276	115.299	129.811	84.1365	63.333	102.052	107.958	65.8485	213.024	200.816	164.558
1.10.7	1000	324	110.229	95.1333	0.340397	9.53245	115.717	33.2561	58.9143	3.43444	0.389404	8.5457	44.2424	87.4892	3.74967	50.9121	53.5744	0.783223	151.471	109.593	150.751	105.718	98.1536	67.3987	54.5819	85.1656	143.393	80.7488	233.317	230.65	208.583
1.10.7	1000	325	36.9241	44.659	0.203567	6.79643	82.5702	21.6133	39.3354	0.095476	0.006307	4.18334	36.47	71.9317	1.00283	18.7797	84.5594	2.13963	235.392	94.5977	133.599	94.0452	87.7529	57.4787	47.8969	82.4774	146.633	81.1988	231.912	229.4	205.531
1.10.7	1000	326	13.8489	20.6353	0.004791	2.87204	10.0344	1.17616	1.78833	0.002537	0.007328	0.242954	9.85175	17.9295	94.08	0.350902	0.342728	0.033258	0.003946	68.5614	102.321	69.0251	151.952	64.2097	50.2492	157.601	149.448	85.093	207.115	187.976	147.954
1.10.7	1000	327	14.5729	23.67	0.066758	2.54227	13.4309	1.91354	2.35677	0.000547	0.004104	0.305609	11.1773	14.6186	5.39152	0.890014	0.178659	0.659918	0.299042	130.633	162.789	122.636	160.225	105.537	82.0848	156.47	168.048	106.119	225.852	218.245	187.798
1.10.7	1000	328	28.5533	32.49	0.095939	12.5274	51.3133	21.6854	21.3182	0.00714	0.122267	7.38733	32.5078	121.536	55.1397	18.2731	3.94779	0.060687	3.47434	77.5569	119.206	80.3021	84.7095	43.2129	35.834	76.3699	131.708	69.0942	218.716	214.865	178.634
1.10.7	1000	329	13.7737	12.4792	0	0.212716	1.0575	0.077139	0.178588	0.000468	0.012623	0.176251	0.947639	3.57644	3.21692	0.176718	0.028518	1.0201	0.002805	17.7218	47.6349	27.136	63.864	17.1992	13.6494	86.9187	77.9271	37.8013	55.4769	49.3216	34.6985
1.10.7	1000	330	13.3949	14.5837	0.614458	0.725569	0.93842	0.147256	0.157965	0.002677	0	0.105756	0.800535	2.17001	109.904	0.03079	0.45917	1.75234	0.643909	6.94645	30.2209	16.0428	29.4685	5.48996	4.09906	27.9558	32.3641	11.4632	36.3173	31.5141	23.5355
1.10.7	1000	331	29.5789	36.5672	7.59016	47.3295	69.9844	44.6097	28.7265	0.412897	0.82335	35.6461	45.4523	244.602	119.037	77.0905	22.3484	0.314487	8.78362	74.8356	115.094	79.7433	79.4487	48.6403	40.9594	67.1149	116.933	64.6039	220.117	214.371	180.283
1.10.7	1000	332	231.629	143.889	23.731	57.1401	59.6702	46.6339	37.4261	0.021205	1.33454	29.1987	61.1406	72.4445	0.094308	0.318638	0.076451	0.018136	0.093192	120.716	162.099	111.375	114.881	73.6303	56.2107	79.0374	81.0109	49.8661	205.128	192.155	157.133
1.10.7	1000	333	12.9973	11.5506	0.008938	0.180932	0.616197	0.031961	0.102384	0.000271	0.016522	0.111322	0.344529	1.10482	1.23266	0.030607	0.157367	1.11728	0.09182	14.4171	47.9615	32.1966	43.9022	15.1035	15.5211	49.7359	59.4957	33.4675	55.8353	59.2852	50.3432
1.10.7	1000	334	15.833	26.9583	0.105721	15.2184	58.0164	13.9425	20.0446	0.007111	0.008217	2.70591	28.8774	64.2328	3.81795	4.76375	1.27718	0.627212	0.515645	98.0547	136.4	96.8657	133.799	70.1124	55.6029	128.601	150.082	86.3992	224.708	216.904	182.532
1.10.7	1000	335	17.5572	6.54905	0.001171	0.005385	0.025521	0.006556	0.010068	0	0.000468	0.001405	0.007258	0.022243	0.077968	0.000937	0.026692	0.092952	0.001405	12.5268	36.2133	22.6312	23.5301	12.0023	9.6893	18.9593	18.3025	11.158	31.4753	26.4205	20.3805
1.10.7	1000	336	24.9282	19.8065	0.020452	0.723304	1.09459	0.042478	0.054277	0.000983	0.001377	0.077089	2.2588	2.13471	0.39115	0.005703	0.430088	1.247	2.21514	65.7009	105.498	71.7451	78.1166	36.8547	30.5188	68.3264	92.2682	50.1042	162.82	157.519	122.612
1.10.7	1000	337	18.2805	29.4309	3.616	30.0613	88.4944	31.2869	40.0565	1.05813	1.34027	18.7269	43.7323	114.341	124.837	40.8544	14.3904	0.6368	6.27787	119.671	148.852	108.525	151.587	92.7611	73.1419	148.607	169.178	103.391	229.516	220.381	189.298
1.10.7	1000	338	22.5393	16.1499	0.038413	1.38226	1.77046	0.049032	0.222049	0.000625	0.000312	0.278888	1.44878	2.40756	0.471268	0.021861	0.708932	5.49001	1.46502	94.8389	125.085	86.2039	92.4553	54.6699	42.6221	76.7483	94.6833	54.6156	168.342	158.368	123.651
1.10.7	1000	339	10.0292	4.68811	0	0	0	0	0	0	0	0	0	0.002117	0	0.001954	0	0.001792	0	9.26563	32.0124	20.5557	17.2321	14.1238	10.6181	15.0186	14.715	11.1637	18.2844	18.6906	14.6169
1.10.7	1000	340	21.4194	19.0626	0.058549	0.76808	2.17122	0.01341	0.023587	0.000718	0.000479	0.103688	2.95426	2.16463	0.350575	0.003712	0.42852	2.34662	1.68822	78.6772	111.364	73.7347	88.4399	43.3184	32.6401	75.6972	99.5958	51.894	185.371	175.135	134.403
1.10.7	1000	341	13.695	23.6733	0.092201	9.14363	38.1391	5.73967	9.52272	0.001683	0.003366	0.8242	20.8698	37.3737	3.15149	0.877127	0.393679	1.35048	0.055171	101.884	131.645	93.3095	151.292	80.3613	62.5231	148.923	153.395	90.231	220.993	207.169	169.613
1.10.7	1000	342	52.6116	54.9335	0.940418	21.0707	51.8888	15.9251	20.5729	0.027123	0.021787	2.45998	30.8668	46.6945	1.33726	0.781236	1.90151	0.741663	5.46754	104.859	147.579	105.291	107.47	67.0623	53.6169	96.9858	131.495	75.4924	221.211	215.772	182.582
1.10.7	1000	343	18.083	19.0619	0.003419	0.153248	6.65558	0.124339	0.508237	0.001554	0.001243	0.169412	2.88188	1.00311	0.608642	0.02207	0.803544	71.876	77.9375	61.392	91.1278	61.2347	79.7634	36.4377	28.2481	68.0233	104.841	52.6615	193.348	185.79	144.8
1.10.7	1000	344	249.915	137.209	0.322708	6.05848	7.65227	0.516596	0.901212	0.02529	0.026607	0.190727	10.4573	9.11776	0.699684	0.026344	0.566913	1.09668	3.0893	75.3217	117.495	80.1528	80.6639	43.128	36.0693	60.8535	77.8865	44.21	172.767	161.312	127.314
1.10.7	1000	345	14.0157	25.6072	0.151713	16.3977	51.3759	15.3674	20.5051	0.001305	0.113214	5.7367	29.3909	73.9801	11.7791	8.29951	2.62284	0.028059	0.177488	142.502	161.573	120.426	172.13	110.98	85.5612	168.713	177.752	113.852	229.136	219.304	188.895
1.10.7	1000	346	9.83576	3.41788	0	0.000246	0	0	0	0	0	0.000246	0	0	0	0	0	0.028072	0	6.40409	28.5947	17.8658	10.9842	9.64393	9.90987	11.7853	11.8926	8.8557	14.1236	13.917	13.1519
1.10.7	1000	347	18.4737	22.0515	0.595074	1.51546	16.6323	2.60997	1.7142	0.001145	0.000573	0.194158	12.2658	10.5281	58.0733	0.068156	0.469072	10.8013	12.6993	74.5097	108.141	74.5464	97.4221	50.3499	39.5968	91.9009	136.072	72.929	213.399	208.667	170.038
1.10.7	1000	348	9.28931	3.38681	0	0	0	0	0	0	0	0	0	0	0.000357	0	0	0.00107	0	0.000178	0.001604	0.000713	0.000357	0.000178	0.000535	12.3135	11.848	11.6078	0.074688	0.058111	0.060428
1.10.7	1000	349	14.787	18.3443	0.010966	0.76566	1.90191	0.065946	0.092835	0.001803	0.000751	0.002704	3.83942	4.90611	0.800361	0.006159	0.040258	0.132342	0.049872	54.8707	91.0143	59.1061	113.469	42.356	32.2692	112.778	112.446	58.843	183.391	165.936	124.094
1.10.7	1000	350	17.4886	17.1493	0.118419	0.543166	11.293	0.048927	0.110087	0.000886	0.000532	0.001595	2.38628	0.478461	0.209005	0.006382	0.091296	42.4614	1.82698	84.6187	118.22	82.2198	86.351	50.8832	40.2684	78.2106	123.423	66.022	220.491	214.572	180.725
1.10.7	1000	351	13.2063	12.7493	0.071502	0.084362	1.21948	0.025892	0.015261	0.000514	0	0.014746	0.265432	0.045096	0.171125	0.001029	0.01166	199.443	14.9995	98.0561	123.665	85.8013	101.279	55.2714	42.7558	88.2586	111.505	61.0225	213.776	202.258	166.003
1.10.7	1000	352	7.53338	3.92008	0	0	0	0	0	0	0.006445	0	0	0	0	0	0	0.113947	0	5.13406	20.0196	15.4718	14.2271	9.25264	9.4942	11.2619	11.8123	8.16473	15.1549	14.2908	14.0559
1.10.7	1000	353	101.772	38.5879	0.033086	2.25501	5.2343	0.06257	0.155075	0.025208	0.024083	0.022957	5.25186	5.52645	0.595769	0.027459	0.484357	1.88296	1.77605	92.5449	129.469	87.8456	89.0106	48.673	37.8181	76.3052	100.507	54.6847	188.813	179.637	140.78
1.10.7	1000	354	31.0312	29.2794	1.63774	25.4071	25.4973	9.27499	8.1531	0.01999	0.049732	4.60507	25.9732	72.5978	1.90688	0.506095	5.06241	0.084349	1.14237	44.6255	82.0312	52.6431	66.8679	20.2852	17.8108	51.5914	72.6529	34.3384	170.061	155.938	116.019
1.10.7	1000	355	31.8795	30.0873	0.02347	4.83202	28.783	3.2413	7.40981	0.003165	0.002901	0.128956	18.4784	38.2389	0.630011	0.144251	4.72864	0.371044	155.856	66.9417	104.661	69.1245	83.8299	34.418	27.8563	70.1303	101.114	50.6653	199.715	190.283	150.773
1.10.7	1000	356	13.6992	23.788	0.023059	11.4484	37.7418	7.76782	11.6295	0.000795	0.012457	1.83726	23.8606	66.33	10.6761	2.51895	1.10125	0.132521	0.016168	94.3305	125.297	86.1633	170.755	85.3284	65.851	173.699	168.108	100.444	223.876	208.979	172.524
1.10.7	1000	357	25.2075	20.3297	0.005554	0.341421	41.9676	0.106402	3.3458	0.000292	0.000292	0.001462	0.870506	0.142064	0.001754	0.007892	0.013154	50.47	0.154925	132.17	166.939	123.545	103.597	74.3139	60.0319	93.0058	156.529	90.2803	237.8	236.853	233.089
1.10.7	1000	358	16.5752	19.8706	0.10417	0.794826	6.38241	0.051878	0.046924	0.00055	0.001651	0.08573	4.78698	0.917435	0.833356	0.005917	0.088482	2.45039	1.44172	74.3082	106.915	72.6476	88.5749	46.5341	36.0808	76.5568	110.89	58.4425	201.972	194.084	154.094
1.10.7	1000	359	117.12	131.386	3.14857	35.0797	51.5296	22.9764	23.516	0.018344	0.040501	9.92572	41.172	46.5136	0.188158	0.064475	1.31093	0.025427	1.1215	132.937	169.532	119.699	129.794	83.8029	64.3291	99.0058	106.971	65.3382	219.292	209.445	175.922
1.10.7	1000	360	24.2267	29.8726	0.038956	1.12578	34.7062	2.4053	10.0475	0.002901	0.001865	0.077497	18.6278	21.649	0.801492	0.161832	17.8141	1.32967	97.6448	63.0108	102.668	69.4648	71.8554	34.8676	29.6913	62.9217	120.714	61.7526	214.912	211.918	177.646
1.10.7	1000	361	22.7514	22.5436	0.001898	1.03966	14.9416	1.78994	3.07381	0.001708	0.002277	0.077989	11.5954	7.05541	1.46793	0.052182	8.2964	22.3213	243.554	62.8624	92.6801	63.0736	80.0042	37.3958	29.9359	67.3391	106.632	54.7546	198.195	191.29	150.622
1.10.7	1000	362	13.2043	16.0861	0.000938	0.157166	0.764954	0.039174	0.081867	0.002111	0.000704	0.002346	1.41848	2.18672	2.46657	0.020174	0.012433	0.002111	0.004222	32.8482	71.4133	47.1954	117.684	38.8517	34.5459	134.393	123.131	70.103	153.156	135.977	105.719
1.10.7	1000	363	31.8596	41.7072	0.047337	2.50027	81.6489	16.3416	37.1207	0.050923	0.003945	1.1915	33.139	60.0439	0.526089	17.9014	32.4452	0.765824	124.176	93.5238	134.95	94.6703	87.1092	58.2284	47.9084	82.4285	149.997	82.3694	232.803	230.615	207.588
1.10.7	1000	364	8.32419	4.72274	0	0	0	0	0	0	0	0.150903	0	0	0	0	0.470036	11.8765	0.06065	3.51841	14.8982	11.0209	11.8513	5.36967	5.73863	8.39928	8.60433	5.97762	13.8368	11.9141	11.3812
1.10.7	1000	365	13.4146	8.14634	0	0	0	0	0	0	214	0	0	0	0	0	0	0	0	6.07317	25.2683	16.2195	17.0732	8.65854	5.41463	11.0732	11.878	7.29268	19.7073	18.122	16.9268
1.10.7	1000	366	10.5138	5.09841	0	0.000447	0	0	0	0	0	0	0	0	0	0.001342	0.000671	0.143592	0	9.87855	33.217	22.3673	17.953	11.8824	11.6898	14.9231	14.8962	12.0083	21.7665	20.8712	19.4352
1.10.7	1000	367	252.529	151.247	2.89491	39.8282	53.5393	31.2857	29.2866	0.013204	0.030942	14.9537	45.601	71.5436	0.066951	0.090024	0.096026	0.028141	0.127101	124.811	164.959	113.85	115.581	75.8596	58.1238	81.5784	85.0455	52.3421	208.556	196.189	161.291
1.10.7	1000	368	24.6973	27.4288	0.091051	1.7709	17.4758	0.530057	2.35657	0.003329	0.000392	0.021931	12.6869	11.914	1.07245	0.020168	4.9998	1.81711	69.5902	53.7625	92.223	61.2287	71.5986	28.4322	23.6971	59.8663	102.348	50.6759	196.105	190.896	152.422
1.10.7	1000	369	7.5063	3.82981	0	0	0	0	0	0	0	0	0.00528	0	0	0	0.000609	0.019903	0	4.79244	17.6667	11.9472	14.0697	12.9429	6.89135	11.0894	11.4285	8.60439	15.5108	12.4504	10.7697
1.10.7	1000	370	252.492	160.811	0.135538	26.5103	52.3546	18.5551	22.9915	0.02288	0.061428	5.1813	34.8391	82.1699	0.839592	0.957225	4.40885	0.044019	3.37453	109.761	155.863	110.616	93.3696	64.0216	53.4583	74.4573	105.89	62.6705	214.701	207.67	173.628
1.10.7	1000	371	12.0966	9.03149	0.006998	0.031491	0.440868	0.008397	0.083975	0.0007	0.045486	0.220434	0.151854	0.3331	0.09867	0.020294	0.448565	4.683	0.371589	7.59482	38.2729	33.1917	18.1267	12.7292	17.8348	15.0532	27.4682	22.499	22.62	31.7908	36.3289
1.10.7	1000	372	12.769	18.1708	0.000996	0.800478	3.78176	0.148945	0.226205	0.001195	0.002589	0.009956	5.16328	6.11788	2.21705	0.02489	0.03644	0.0227	0.001991	73.2965	105.227	71.2565	154.835	68.1203	52.7119	159.168	146.831	83.6302	208.568	188.133	147.024
1.10.7	1000	373	172.205	198.282	8.00793	43.9043	84.8069	36.395	41.6144	0.075341	0.286245	18.9638	52.1239	74.5876	0.487485	4.67658	1.59703	0.024783	1.23123	166.526	196.649	146.58	155.271	110.61	85.3767	119.629	122.259	78.7737	230.743	223.808	197.207
1.10.7	1000	374	10.32	3.95895	0	0	0	0	0	0	0	0	0	0	0	0.001225	0	0.001021	0	8.39289	31.6134	20.33	11.7204	9.02614	10.1873	14.0986	13.8078	10.3226	19.118	14.6192	12.4407
1.10.7	1000	375	235.523	181.155	25.6415	58.4768	65.4946	47.7482	40.3011	0.020164	1.24595	29.2401	60.0143	60.7371	0.225789	0.504908	0.136641	0.031043	0.05333	138.747	175.146	124.117	131.974	88.3592	67.4816	94.9154	96.2266	60.801	217.375	205.985	173.214
1.10.7	1000	376	10.0851	4.73217	0	0	0	0	0	0	0	0	0	0	0	0.001175	0	0.008391	0	7.93673	31.1151	19.2299	13.1158	9.13291	9.27253	14.1599	13.6021	11.0514	21.7807	19.3308	16.2806
1.10.7	1000	377	10.5648	3.95573	0	0	0	0	0	0	0	0	0	0	0	0.000671	0	0.00559	0	7.76364	32.5845	20.7525	17.8721	10.3075	11.8739	13.9126	12.5423	9.43761	18.5713	15.9079	12.0163
1.10.7	1000	378	15.3036	13.7145	0.041398	0.117025	0.847312	0.012186	0.031004	0.000896	0.000717	0.014337	0.300358	0.030466	0.024373	0.005197	0.012186	54.7283	0.609498	82.8452	109.628	74.0421	78.2321	41.2631	31.4918	67.3453	95.8733	49.8124	187.013	176.497	136.954
1.10.7	1000	379	11.1354	8.60434	0.0023	0.029905	0.051922	0.128492	0.277686	0.067696	0	0.001643	0.061781	0.005915	0.005587	0.000986	0.004272	198.035	7.52613	97.653	118.564	82.095	92.4236	56.0421	43.1876	75.7631	85.6674	49.5606	179.625	161.074	126.43
1.10.7	1000	380	251.914	177.986	1.86005	32.7658	50.2654	24.6008	25.7048	0.019628	0.01843	10.464	39.2119	40.7327	0.065778	0.067576	0.14519	0.07252	0.125412	132.103	170.374	119.278	124.544	81.4264	62.1022	87.834	89.7805	55.7221	214.053	202.145	167.929
1.10.7	1000	381	201.966	225.924	2.23953	28.8511	55.3588	19.8694	25.3778	0.015103	0.023317	8.72602	39.3744	44.2864	0.45681	0.208002	1.37493	0.052199	2.48145	158.709	189.398	136.245	156.26	104.793	78.5159	118.996	113.683	71.3898	226.332	216.436	185.591
1.10.7	1000	382	16.9691	28.2208	0.390377	29.0915	61.1996	24.8855	26.356	0.011132	0.090755	7.39434	36.207	101.129	2.19736	8.38811	2.83585	0.018113	0.076604	76.9404	118.339	79.5019	127.702	55.9906	44.5168	124.872	137.888	75.2625	219.4	208.499	170.298
1.10.7	1000	383	79.4801	71.9538	1.53934	29.9535	64.2348	24.5658	30.3922	0.027079	0.03345	7.62854	39.129	75.6505	0.213125	2.65753	3.81395	0.094298	70.044	108.579	149.946	104.752	107.317	64.3721	50.5307	93.079	123.104	69.2208	223.038	216.421	183.203
1.10.7	1000	384	16.5392	30.3956	1.67528	36.1003	89.1146	36.9658	42.9441	0.062956	1.28672	17.9097	45.0906	121.427	8.30727	31.5772	9.41772	0.167661	0.290479	109.697	141.02	100.191	153.253	86.0254	67.1436	149.469	162.304	97.3552	227.711	216.914	184.397
1.10.7	1000	385	252.092	136.443	0.16163	15.0232	23.0269	3.61045	4.71375	0.024362	0.022722	0.909346	23.0349	29.3814	0.037948	0.024596	0.565004	0.135863	1.04193	111.431	151.923	102.32	104.344	66.4762	50.2736	74.3914	76.6233	45.9906	194.324	179.259	142.541
1.10.7	1000	386	100.187	90.2104	16.4614	52.6924	71.1132	42.4568	39.536	0.027778	1.03446	22.9959	56.7773	94.1343	0.089506	5.45936	2.31893	0.016461	65.3925	105.736	147.343	101.276	103.64	62.9048	49.4187	84.2639	111.6	63.1862	218.466	211.157	176.707
1.10.7	1000	387	252.063	166.051	0.070738	4.11892	9.10465	0.440847	0.827681	0.022863	0.020562	0.132883	12.499	8.12414	0.102808	0.019487	0.178149	0.144545	2.49225	127.343	163.414	111.283	125.14	80.7774	59.81	91.4413	86.273	53.4433	201.493	185.548	148.872
1.10.7	1000	388	8.82063	4.31683	0.002823	0.009555	0.001303	0.000217	0.000217	0	0	0.004777	0.000434	0.009338	0.001303	0.000434	0.000434	0.095331	0.002389	0.057112	0.256895	0.123996	0.291205	0.129859	0.133333	14.9533	14.0916	11.3047	19.9116	17.4708	15.6732
1.10.7	1000	389	27.0638	33.3187	0.050746	1.2556	51.2552	6.7097	22.9459	0.003358	0.002612	0.127612	20.9321	16.1657	0.044776	3.79179	233.153	3.08657	222.736	94.741	132.584	94.2049	90.0545	59.1784	48.1563	79.3254	135.385	75.8235	229.41	225.132	198.212
1.10.7	1000	390	14.3618	21.9327	0.003726	6.23165	17.7526	2.05698	2.53868	0.001315	0.000219	0.185843	16.494	42.5496	3.88735	0.212141	0.225071	0.001753	0.003506	60.9176	97.2533	61.7342	153.181	58.7206	44.3368	158.334	145.844	79.1657	210.773	189.634	147.068
1.10.7	1000	391	8.80207	4.04275	0	0	0	0	0	0	0	0	0	0	0	0	0	0.002448	0	7.99322	25.7418	17.5132	14.3249	10.7605	12.8296	14.0798	12.8156	10.1772	16.9631	14.2218	15.0008
1.10.7	1000	392	123.071	91.5627	0.804901	14.0236	44.9152	25.0396	18.0452	0.075401	0.288407	7.01225	33.0273	54.803	131.805	7.56362	7.30631	2.3968	9.40245	113.484	149.999	104.977	118.623	69.6513	54.5335	103.135	134.67	76.229	221.833	215.134	181.115
1.10.7	1000	393	7.75057	3.9911	0	0	0	0	0	0.000524	0	0	0.018153	0.009775	0	0	0.000698	0.002095	0	7.52487	14.6642	8.83453	12.442	9.19131	11.7958	13.7755	12.173	9.75633	14.2107	12.3922	10.5154
1.10.7	1000	394	18.4206	17.7727	1.14077	2.19083	2.75291	0.524659	0.556134	0.009665	0.004957	0.373234	2.6855	3.46716	0.68228	0.240397	0.77596	2.86642	5.05725	15.6397	46.5301	28.1886	44.5371	6.74226	5.80991	30.2734	49.0686	20.8768	115.567	108.966	80.1388
1.10.7	1000	395	10.135	4.77956	0	0	0	0	0	0	0	0	0	0	0	0.001098	0	0.000157	0	9.50988	33.0706	21.1612	14.6049	12.8394	9.77407	14.5406	14.5662	11.3416	20.3308	16.432	17.2444
1.10.7	1000	396	223.478	101.516	0.037859	13.0535	24.2095	4.68211	6.02089	0.028068	0.020888	0.899478	20.9334	42.9458	2.33812	0.161227	0.25	0.140992	1.55157	90.6384	130.227	86.9674	126.958	62.7115	47.7833	117.633	115.634	63.9262	201.125	184.383	146.597
1.10.7	1000	397	137.324	147.122	7.8653	46.1253	59.5456	30.1991	29.1062	0.017092	0.086001	17.8195	49.9324	58.5168	0.020347	0.127916	0.438551	0.017499	0.269398	132.367	170.914	119.701	125.701	81.0528	61.9532	90.767	94.2556	58.2587	216.249	205.227	171.227
1.10.7	1000	398	12.452	13.9805	0.192336	0.725653	2.59824	0.231877	0.447401	0.001953	0.000732	0.110081	2.39273	4.58994	90.2768	0.186234	0.150354	0.058579	0.040762	26.9426	56.1721	31.7637	107.346	27.3488	18.8836	114.453	100.471	46.6327	143.344	114.66	78.0032
1.10.7	1000	399	19.9492	18.8131	0.04451	0.875173	27.9278	0.202374	1.073	0.000593	0.000396	0.093966	2.68744	0.908803	0.178437	0.024332	0.015628	111.494	3.05064	105.245	139.994	99.5282	98.2669	60.4237	47.9175	89.0864	140.49	77.1695	235.393	232.686	215.706
1.10.7	1000	400	78.0067	61.5334	0.051928	4.16864	64.1748	13.4591	30.0979	0.018252	0.015167	0.662468	29.636	47.4658	0.149357	6.2108	64.6473	0.056555	151.832	97.6707	139.343	97.7237	85.3167	56.5656	46.2918	75.7985	136.016	74.8118	229.834	226.752	200.781
1.10.7	1000	401	248.566	218.594	5.00307	26.9365	80.7541	31.793	41.1112	0.103484	0.071209	11.4857	40.2659	57.3776	3.36271	8.26998	2.104	3.59426	10.8094	123.79	161.897	115.953	122.839	80.7961	64.3058	102.108	134.181	79.8776	228.01	222.142	195.282
1.10.7	1000	402	9.45546	4.82507	0.00023	0	0	0	0	0	0.000689	0	0.000918	0	0.009642	0	0.050046	0.242654	0.001148	8.0528	20.2277	12.9093	18.3278	10.1407	8.93641	16.067	13.6382	9.79752	22.0838	17.3567	15.0057
1.10.7	1000	403	108.745	123.93	0.237624	7.52585	19.7477	2.29776	3.81867	0.015402	0.022369	0.306931	19.4518	13.9378	2.07554	0.023286	0.684085	0.678034	2.65108	120.914	157.441	107.567	128.401	75.02	55.6678	100.772	105.168	61.1291	211.179	199.143	162.465
1.10.7	1000	404	12.783	14.0991	0.035741	0.237516	2.35463	0.01597	0.092269	0.001014	0.00076	0.002535	0.634728	0.285171	0.043346	0.000507	0.01166	100.632	1.83777	69.7356	98.8418	66.5812	102.764	50.1782	38.0327	91.6862	109.592	58.271	196.629	184.188	144.087
1.10.7	1000	405	25.2653	34.5216	5.78531	50.52	66.8098	45.7585	36.3915	0.014039	1.73086	18.4966	51.6686	112.54	0.265598	9.58154	6.96483	0.002552	0.892796	72.4967	119.622	81.1329	70.7297	37.8965	32.3846	57.731	98.6455	52.4853	211.187	204.979	167.576
1.10.7	1000	406	113.794	126.543	21.9498	63.6294	96.4611	57.8035	54.7298	0.427252	6.18539	32.3403	66.7814	126.155	0.143607	23.2299	4.80999	0.017846	1.92421	132.721	173.02	124.76	117.477	80.9521	63.8927	92.4119	113.922	69.359	226.764	220.056	189.674
1.10.7	1000	407	7.93508	3.92513	0.000175	0	0	0	0	0	0	0	0.000524	0	0	0	0.002443	0.005061	0	6.88447	17.2836	12.7963	15.6113	10.777	8.02827	14.2888	12.8951	11.8253	14.7021	11.0806	9.07749
1.10.7	1000	408	210.991	90.6361	0.107143	16.9976	50.7909	16.0714	22.394	0.018651	0.022619	2.85595	29.8032	64.7044	0.725397	1.34802	6.62262	0.194841	93.5869	95.548	139.051	96.1905	92.2175	54.0405	43.7698	77.5675	115.298	63.1714	216.662	210.614	176.533
1.10.7	1000	409	17.0197	20.5137	0.142757	1.26822	5.34912	0.172811	0.152368	0.000874	0.012231	0.054167	5.68688	4.21055	1.43596	0.019221	0.181723	1.0519	0.866154	66.0723	100.656	67.8588	105.03	46.3568	36.0774	95.6947	112.975	59.9757	195.461	183.95	143.653
1.10.7	1000	410	54.3719	30.9308	0.099701	2.52969	2.15279	0.067021	0.097711	0.01493	0.010285	0.026543	6.36928	5.27704	0.61712	0.017585	0.728102	1.48092	1.90959	54.5435	95.003	62.4804	69.1462	26.5533	22.0879	56.0765	79.3334	39.9112	166.765	157.718	119.854
1.10.7	1000	411	11.1494	7.80035	0	0.004549	0.052312	0.000253	0.000758	0	0	0.03816	0.020217	0.091989	0.273945	0.000505	0.011878	0.039929	0.000505	3.13217	24.6775	11.7369	18.4647	4.20116	1.97675	16.7612	16.3667	4.256	21.5643	16.8565	10.538
1.10.7	1000	412	0	0.002666	0	0	0	0	0	0	0	0	0	0.000666	0.000333	0	0	0.03099	0	7.56148	16.2309	11.7418	16.2536	11.2576	10.4888	0.094302	0.095302	0.069977	17.5418	15.6415	14.089
1.10.7	1000	413	123.184	51.5548	0.16044	17.0423	31.6791	6.25944	8.92798	0.024699	0.031756	0.50083	23.1272	49.4961	0.722291	0.101494	3.25571	0.12225	2.74056	85.9259	128.716	87.177	83.1378	45.6434	36.6883	70.9191	105.158	56.2933	203.225	196.129	157.314
1.10.7	1000	414	9.42728	4.95965	0.003128	0.011573	0.005943	0	0	0	0.005005	0.00219	0.014076	0.008445	0.018768	0.000313	0.129184	0.898342	0.006881	9.79074	22.2781	15.158	22.6681	12.5239	10.7829	18.9281	16.9587	11.3835	27.4398	22.0626	18.2058
1.10.7	1000	415	247.839	104.087	0.096856	6.09938	12.1408	0.482541	1.18518	0.025596	0.022436	0.071733	11.6906	10.8374	0.691104	0.02528	0.54827	0.603413	3.23132	115.07	150.086	102.081	109.618	68.028	50.9995	85.2139	97.8881	57.2991	200.845	188.866	151.113
1.10.7	1000	416	20.1741	33.7226	3.85029	51.477	109.7	54.923	54.9627	0.857885	5.48495	28.0705	58.4057	169.277	2.92142	48.8781	14.0097	0.009856	0.293154	115.746	159.201	115.487	102.475	67.8721	55.7509	87.9065	140.908	82.7035	230.749	227.237	199.401
1.10.7	1000	417	167.274	145.833	0.028791	7.44402	66.0617	12.2076	29.3618	0.020154	0.020793	1.61932	32.7278	42.2271	0.279591	5.43538	24.144	0.244082	79.9322	116.436	155.973	108.701	103.777	67.9306	53.2994	87.0189	138.425	77.8205	231.082	227.877	203.193
1.10.7	1000	418	89.3794	83.4358	0.3278	4.89354	25.9668	2.52675	5.7747	0.021871	0.037681	0.106456	15.2822	9.50593	1.16021	0.046113	0.759157	5.80316	7.38524	123.325	159.54	113.609	119.583	77.6501	60.5275	102.15	125.887	74.2163	221.353	215.041	182.209
1.10.7	1000	419	7.62861	3.88852	0.000194	0	0	0	0	0	0	0.019354	0	0	0	0.001355	0.011032	0.018386	0	5.98026	15.4389	15.0793	13.771	10.2104	10.4616	12.777	11.5256	8.83201	15.2019	13.2742	9.32417
1.10.7	1000	420	24.8253	34.1901	0.901637	33.3589	59.4399	28.2517	27.5258	0.003604	0.122841	7.98003	39.892	78.3401	0.550083	3.49242	6.68329	0.249437	2.99114	82.9422	126.2	87.2948	91.4257	49.4226	40.1768	80.5863	118.953	64.9991	217.113	210.814	174.461
1.10.7	1000	421	146.31	151.337	43.4055	75.9486	89.165	61.3899	51.6521	1.21642	9.31798	42.2911	76.6339	91.8928	0.146841	6.2374	1.43899	0.029931	0.869788	136.047	174.01	123.987	125.636	84.855	65.8659	92.5267	104.113	64.5748	221.694	212.817	181.222
1.10.7	1000	422	13.3318	17.0009	0.00097	0.473877	1.2664	0.033287	0.060541	0.003663	0.003016	0.001508	2.89594	3.1618	1.74513	0.004632	0.005494	0.026716	0.005278	48.61	82.5984	51.9959	131.655	45.0009	33.2958	135.013	121.835	62.7842	188.763	165.182	122.651
1.10.7	1000	423	10.9647	3.68819	0	0	0	0	0	0	0	0	0.000976	0	0	0	0	0.013073	0	7.50673	32.3748	20.3573	16.5005	12.214	8.0882	14.7678	13.1678	9.67766	17.1885	12.7073	10.9805
1.10.7	1000	424	16.8757	16.2486	0.044807	0.370019	8.16704	0.034896	0.032211	0.000619	0	0.000413	1.20483	0.156308	0.139376	0.004956	0.009498	68.5059	0.57485	78.8986	115.421	79.1621	85.9205	49.0498	38.7246	77.0372	123.423	65.4216	230.047	225.295	198.866
1.10.7	1000	425	18.3094	26.0994	0.113758	18.1347	39.0158	10.4674	11.6658	0.002674	0.022363	2.18644	26.9672	66.3668	2.07001	1.79509	1.24113	0.051531	0.136121	51.2815	89.5348	56.1463	110.066	35.8539	27.8294	106.605	110.168	54.4857	195.693	176.857	134.119
1.10.7	1000	426	13.667	22.9927	0.0284	1.18525	6.14773	0.482282	0.400469	0.001824	0.001303	0.038301	8.12689	6.78452	3.96326	0.132621	0.031787	0.651381	0.163887	79.7676	127.059	100.644	148.849	83.4635	71.0685	151.227	156.484	98.7994	213.275	207.834	181.35
1.10.7	1000	427	250.038	200.682	0.653085	8.20396	31.252	4.22727	10.1154	0.019312	0.028733	0.89025	20.2327	15.9498	1.37847	0.016015	0.792511	3.93382	4.1651	160.692	188.094	136.755	158.653	110.19	84.0937	124.734	123.343	79.7244	227.787	218.455	188.157
1.10.7	1000	428	139.724	14.46	0.011698	0.268679	0.073962	0.009434	0.014717	0.018491	0.004528	0.006792	0.085283	0.065283	0.010189	0.006792	0.293208	1.5883	0.353585	27.677	56.634	36.963	38.3958	21.6974	17.6894	27.7468	32.6634	20.0245	63.697	58.3283	44.7525
1.10.7	1000	429	14.5699	24.5672	0.035952	14.2984	38.9363	9.4197	11.4801	0.003126	0.010746	1.36127	25.0135	67.0236	3.90817	1.25674	0.663345	0.044353	0.004494	76.5873	115.583	77.1862	146.652	63.101	48.5762	147.856	148.848	82.6436	219.335	206.135	167.228
1.10.7	1000	430	216.606	35.561	0.096308	2.69743	3.13884	0.598716	0.927769	0.023274	0.019262	0.048957	1.78331	1.42215	0.24077	0.017657	1.30177	1.77448	0.687801	13.5698	38.9759	26.5827	27.5305	12.2753	11.5754	18.3644	21.6252	13.2745	39.7986	33.3443	29.3274
1.10.7	1000	431	23.884	30.5442	0.003117	2.23	33.2761	4.29269	11.4306	0.00381	0.001039	0.321441	19.9176	29.4399	0.308278	0.680637	96.5958	2.13994	230.757	58.5733	94.5715	62.6786	66.5902	29.9567	25.4378	51.319	101.034	50.8195	206.037	200.797	163.872
1.10.7	1000	432	55.8719	46.1892	2.23855	40.2656	54.6694	30.6928	27.5501	0.012547	0.231058	10.6348	43.5323	96.298	0.160176	2.40883	3.22666	0.017761	1.47743	78.0422	126.367	86.2687	70.4303	40.8379	34.6016	57.8983	95.6707	52.1193	209.053	202.371	164.655
1.10.7	1000	433	14.0068	13.5944	0.031738	0.077311	1.3693	0.011882	0.01888	0.000163	0	0.003092	0.384928	0.080729	0.065592	0.003581	0.000814	144.056	6.86426	79.3018	108.981	74.3644	83.7757	42.1266	32.5924	72.9118	103.636	54.1888	207.28	197.819	160.581
1.10.7	1000	434	236.013	83.7273	0.433025	17.7263	20.1316	4.35663	4.66598	0.025009	0.024666	0.948955	22.2381	42.0829	0.3395	0.049675	2.6903	0.107914	1.89722	71.0695	116.69	78.8051	68.4659	34.9198	30.6564	53.2354	78.9654	42.6016	182.456	172.679	135.428
1.10.7	1000	435	64.5689	56.6105	1.33802	32.8042	43.4134	20.5042	19.6684	0.020509	0.042157	5.04899	36.3559	59.8272	0.473414	0.325674	4.90334	0.082795	1.98196	75.899	122.981	83.6046	75.6052	39.962	33.3528	62.0182	98.1812	52.6398	204.993	198.202	160.116
1.10.7	1000	436	25.9163	23.6481	0.029703	1.1382	53.4785	1.16914	7.80445	0.000825	0.000413	0.179868	3.7599	1.31353	0.011964	0.44967	0.028878	111.742	3.2401	136.25	168.452	125.984	116.972	81.0714	66.0495	107.325	160.865	95.0132	237.825	236.471	229.888
1.10.7	1000	437	60.9951	68.1306	24.1135	69.8448	107.621	69.1294	61.6297	2.25507	11.5738	36.937	71.2719	159.243	1.91067	42.2729	13.2631	0.020991	3.47791	108.913	155.619	112.227	90.9927	63.6688	52.69	77.5921	120.454	70.8028	227.154	222.29	192.103
1.10.7	1000	438	50.6745	34.9743	0.070309	2.42824	16.7366	0.219601	0.924517	0.017653	0.007609	0.019175	9.57434	4.93197	0.646629	0.020088	0.381068	2.96439	3.07594	77.6364	117.513	80.3896	85.4016	44.1082	35.0603	75.6946	113.89	60.1147	203.736	197.882	159.219
1.10.7	1000	439	10.9114	4.81316	0	0	0	0	0	0	0.003655	0	0	0	0	0.000685	0	0.029009	0	8.99931	30.4214	19.2328	18.7634	11.6334	9.58337	16.2366	14.1635	10.9267	23.7449	19.7044	16.4696
1.10.7	1000	440	13.9885	14.1549	0.172025	0.324384	3.33824	0.120383	0.195109	0.002223	0.000171	0.035397	0.789159	0.449897	1.30301	0.080198	0.029241	243.235	31.5458	90.4429	121.753	84.0657	105.06	55.1149	42.9248	92.2474	119.892	65.6768	221.575	212.533	180.351
1.10.7	1000	441	7.76387	3.98781	0	0	0	0	0	0	0	0	0	0	0.000364	0.000182	0.006185	0.014371	0	7.00291	10.7691	10.3606	14.4923	9.12116	7.10715	12.6653	12.0362	9.83282	12.9598	11.757	10.4712
1.10.7	1000	442	250.994	130.166	3.7545	47.6201	75.1715	39.0263	39.06	0.018166	0.58564	20.1313	51.4855	130.12	0.146886	10.8592	1.34446	0.024567	0.838062	117.655	162.179	114.362	96.4967	68.6642	55.508	75.9879	103.423	61.5381	220.44	213.053	179.455
1.10.7	1000	443	27.099	40.0026	0.027375	2.95431	86.3587	20.9853	41.8351	0.045089	0.002818	2.24094	37.1361	75.7482	0.019324	25.4332	109.05	0.016506	170.208	85.7576	127.76	87.9215	77.2583	50.181	42.1924	71.2142	143.951	77.6248	232.521	230.577	207.5
1.10.7	1000	444	17.8698	30.6533	0.746846	28.9321	76.9188	28.9029	33.1677	0.025073	0.152863	10.2603	38.2379	78.9054	2.40715	14.0157	4.67713	0.082336	0.392106	113.029	148.697	107.262	130.807	78.5579	61.6886	120.677	148.444	87.5427	227.187	219.31	185.945
1.10.7	1000	445	246.728	184.108	5.46485	25.1165	72.702	22.3903	31.3033	0.053515	0.167891	9.65372	34.3547	30.5645	2.62539	3.03987	1.1574	91.9255	14.4533	157.736	187.22	138.78	155.549	108.896	85.9633	127.072	146.726	92.6285	235.268	231.616	214.458
1.10.7	1000	446	174.48	129	20.5839	57.6542	64.5616	46.6236	39.2443	0.013132	1.66426	28.3714	61.0451	88.8838	0.023856	0.865178	0.256511	0.012257	0.434887	118.531	159.993	110.437	109.891	70.9564	54.9072	78.8941	87.2937	53.0538	209.002	197.634	162.348
1.10.7	1000	447	20.3279	8.48012	0.012952	0.056928	0.061596	0.007229	0.01988	0.000602	0.087199	0.02244	0.054066	0.169277	0.123494	0.00256	0.487952	2.23328	0.16506	28.7258	53.6896	34.3944	42.3639	21.2614	16.6361	32.2477	33.8203	19.658	61.4431	53.589	39.4669
1.10.7	1000	448	71.095	78.5864	14.2956	57.5325	83.3765	50.7024	46.0876	0.046526	3.75876	26.2138	59.7162	115.073	0.15137	17.9825	5.78394	0.025175	1.58923	105.974	152.228	107.796	92.793	61.9602	50.4946	76.34	110.614	64.5642	222.708	216.642	183.722
1.10.7	1000	449	14.6122	21.3398	0.00493	5.69618	14.3671	1.03328	1.26972	0.006163	0.004314	0.062449	14.1374	27.0548	2.04951	0.046015	0.086278	0.014174	0.013147	52.3324	90.424	57.5789	132.809	45.2091	34.15	134.664	127.813	65.8956	202.715	183.338	141.241
1.10.7	1000	450	8.34606	4.37161	0	0.000315	0.000315	0	0	0	0	0.004416	0	0.000631	0	0	0.090852	0.185489	0.041009	7.00063	17.6246	11.2107	19.5817	11.8694	10.1514	16.952	14.8505	10.1653	18.1104	13.9347	12.4653
1.10.7	1000	451	11.685	11.2977	0.009589	0.18063	0.735826	0.0344	0.174637	0.002157	0.057054	0.041352	0.790004	1.58972	1.00791	0.024332	0.041352	0.041951	0.026369	10.5685	37.3261	18.98	70.8179	10.6893	5.75045	74.8417	61.8798	22.9535	97.4675	71.7253	45.7371
1.10.7	1000	452	13.2426	11.479	0.011162	0.082121	0.23819	0.009966	0.030098	0	0.000199	0.058401	0.250947	0.60574	1.46522	0.004983	0.056608	0.209488	0.040861	33.05	64.7662	39.4947	80.5443	26.9306	20.0564	87.3337	84.6755	41.888	108.441	94.6157	65.6841
1.10.7	1000	453	239.572	168.476	1.78849	27.075	53.724	21.5433	24.5938	0.023242	0.056944	10.6368	37.0343	51.9111	3.80941	2.14875	0.315514	0.856479	0.721092	90.1732	125.637	89.663	143.175	79.7257	64.1836	132.18	130.712	78.9006	209.095	192.478	161.727
1.10.7	1000	454	247.335	221.657	1.26021	12.3457	38.4017	8.58519	14.4986	0.020686	0.034295	2.28035	25.4409	29.1802	2.51551	0.446924	1.30974	1.21121	6.05498	92.4948	131.106	89.6277	97.7028	53.5264	43.3914	78.4633	105.133	58.2161	205.532	195.81	160.985
1.10.7	1000	455	144.026	75.1291	0.210784	19.1144	27.1362	7.74673	7.66558	0.036492	0.026144	1.4744	25.9417	53.4613	0.956972	0.285403	0.543573	0.076797	1.18137	88.0163	127.358	84.7326	119.083	57.4902	43.5577	109.363	113.459	61.8017	202.421	188.104	148.992
1.10.7	1000	456	70.0093	64.8254	0.249171	6.32415	33.7726	3.58037	8.34818	0.025891	0.029619	0.136288	18.292	14.106	1.78604	0.048467	0.809859	1.32519	5.88339	103.525	144.644	102.072	103.77	63.4774	49.9901	92.761	127.542	71.8148	218.807	213.474	179.441
1.10.7	1000	457	20.6503	28.7835	0.18686	26.3588	46.6568	18.9401	17.8688	0.008375	0.022706	4.13289	33.2795	81.8798	1.38359	2.10032	2.18183	0.013214	0.289782	66.1591	107.842	70.8301	108.968	44.0562	34.8989	104.088	118.951	62.1161	209.251	196.89	156.02
1.10.7	1000	458	27.7038	43.4718	29.2102	79.1656	135.941	83.951	75.4245	10.695	18.5091	48.1011	77.3825	204.116	10.327	72.2759	22.9265	0.208727	4.4463	120.015	163.105	119.395	100.517	72.497	59.5537	86.8305	140.176	84.2788	231.798	228.134	201.881
1.10.7	1000	459	249.687	119.092	0.499586	22.9177	48.1747	14.5844	19.2595	0.027502	0.028743	3.06348	30.2839	48.1319	0.504342	0.373863	1.86104	0.141439	2.54632	105.917	149.975	105.344	93.8981	61.6456	49.7974	73.9373	104.174	60.318	214.983	207.874	173.091
1.10.7	1000	460	109.284	128.294	0.058015	6.08092	66.6863	15.1023	30.1729	0.04084	0.024809	2.16985	32.242	47.9256	0.769466	9.32557	43.1931	6.53893	204.218	127.961	163.553	117.571	118.497	81.2176	65.2168	99.3962	138.347	81.9805	230.929	226.944	202.634
1.10.7	1000	461	9.41427	4.41833	0	0	0	0	0	0	0.004642	0	0	0	0.002901	0.00029	0.088773	0.121845	0.016826	6.3078	25.915	17.3658	12.0464	7.57818	7.42153	13.7697	13.8457	10.0612	18.0804	17.7012	15.978
1.10.7	1000	462	24.8076	34.1337	0.041757	1.00162	54.9136	6.57739	23.0288	0.00162	0.0027	0.087653	24.0904	30.0734	0.095932	2.28762	60.5045	0.163247	101.382	83.741	125.512	87.674	79.6256	50.121	41.7732	73.4671	141.356	75.9743	229.703	227.41	201.431
1.10.7	1000	463	15.4091	17.0283	0.188256	0.512522	7.30203	0.122193	0.12025	0.002591	0.03519	0.015328	2.30203	0.823618	0.378238	0.01101	0.034111	67.0091	2.33895	80.8316	113.095	77.8795	102.897	56.4333	43.6921	94.0164	125.145	67.8051	213.112	205.182	167.931
1.10.7	1000	464	30.3724	16.3879	0.030946	1.16265	0.758546	0.053976	0.169485	0.001799	0.006477	0.465635	0.735157	1.45052	0.626844	0.011515	0.849946	3.96509	1.35265	81.2184	114.283	78.724	80.7902	47.7067	37.8122	64.4401	78.7013	46.4944	139.429	132.709	103.778
1.10.7	1000	465	13.839	14.5519	0.63912	0.610947	1.44218	0.010732	0.051516	0.000537	0	0.098739	1.01529	0.178964	0.612289	0.005098	0.156426	37.7561	1.4733	79.7191	106.257	72.1937	98.2831	52.3587	39.4722	85.3002	104.174	56.4567	188.674	175.302	135.54
1.10.7	1000	466	7.6238	3.92452	0	0	0	0	0	0	0	0	0	0	0	0	0.004883	0.047813	0	7.00956	13.8527	12.846	12.4846	10.7337	7.87447	11.8928	9.55422	8.08627	14.5695	13.3821	12.367
1.10.7	1000	467	245.166	63.294	0.160963	6.61196	12.4824	0.267608	1.03455	0.032392	0.034551	0.04186	9.26977	9.9186	0.767442	0.03505	0.682226	1.97674	5.2887	99.3061	138.621	95.0153	89.4797	55.095	43.1654	73.6512	101.671	57.3118	199.26	190.836	152.667
1.10.7	1000	468	12.6988	10.3614	0	2.40964	8.6747	2.48193	3.07229	0	0.46988	0.096386	1.51807	5.62651	1.24096	0	0.012048	1.84337	0	1.3494	13.747	5.91566	14.506	1.07229	1.24096	57.4337	48.4819	24.0361	10.6747	9.91566	6.74699
1.10.7	1000	469	15.3939	21.5502	0.034618	1.43037	7.73171	0.72856	0.840546	0.001574	0.002623	0.045633	6.73223	6.58589	1.70968	0.074482	0.078154	0.782848	0.614739	110.783	144.017	102.802	140.851	81.8413	63.4868	134.721	146.059	87.3661	217.217	206.37	167.197
1.10.7	1000	470	229.569	226.358	0.095507	7.57524	70.8473	16.5862	34.2347	0.045869	0.023877	2.9535	35.514	52.1219	0.430097	7.05027	42.9312	0.118442	182.193	156.679	187.18	136.145	143.045	99.4103	76.5617	107.966	128.087	78.8209	232.406	227.623	204.423
1.10.7	1000	471	23.4613	26.2131	0.241258	1.29503	26.6976	0.696363	3.27675	0.001406	0.001933	0.035495	10.53	4.49517	0.641188	0.049376	0.724653	2.71956	6.33316	86.3026	124.502	86.8499	91.6633	53.2293	42.369	85.8355	134.814	72.9055	219.448	215.399	181.136
1.10.7	1000	472	14.1446	19.5142	0.0021	0.611481	2.49423	0.183059	0.328316	0.0049	0.0021	0.040252	3.37767	3.42772	1.87189	0.060203	0.043402	0.361218	0.163458	33.5093	76.2363	63.1677	116.234	48.3472	51.5264	126.277	124.88	80.8148	162.503	155.639	143.214
1.10.7	1000	473	95.5209	48.1427	0.244033	8.78742	8.18169	0.968267	0.94524	0.021904	0.019377	0.116821	13.2193	14.7607	1.508	0.050828	1.51587	2.02724	3.84302	47.6667	88.4434	58.1766	60.7694	22.7543	19.9643	46.1716	74.6695	37.0761	169.045	160.881	123.332
1.10.7	1000	474	104.728	104.968	27.45	74.0419	121.999	77.131	71.6784	6.06967	15.572	42.3143	75.055	170.893	4.37978	52.2226	17.3117	0.02462	4.06653	141.735	177.901	132.098	125.854	91.6721	71.9466	105.915	138.446	86.0964	231.598	226.522	200.112
1.10.7	1000	475	94.9374	38.5598	0.377547	1.8003	3.2927	0.150426	0.08003	0.011486	0.015561	0.034457	2.76213	0.573175	0.061875	0.021489	0.064468	69.0059	5.39644	71.8322	105.505	71.7355	83.1882	42.897	33.4935	69.9478	97.6828	51.874	193.097	183.508	145.384
1.10.7	1000	476	9.09697	4.36869	0	0	0	0	0	0	0.005661	0	0	0	0	0.000246	0.000984	0.036426	0	6.89786	24.9687	14.6096	16.2594	7.95545	6.49717	12.887	11.6773	7.45237	17.0921	14.76	12.3288
1.10.7	1000	477	18.7753	20.6891	0.071709	0.789356	14.5515	0.345938	0.801961	0.004762	0.00112	0.259384	3.87787	2.54398	0.819048	0.241176	0.119328	128.103	8.84734	105.974	137.405	98.0137	116.939	70.1468	55.4238	107.922	141.26	80.4796	229.615	223.981	196.917
1.10.7	1000	478	231.25	69.5583	0.173926	31.3337	61.6445	22.0277	26.8646	0.033255	0.047675	7.91583	37.817	98.3608	0.92525	5.68305	3.1545	0.074161	4.04885	105.221	150.22	105.448	86.0906	58.9267	47.8946	72.2972	110.544	63.6139	219.256	213.473	178.938
1.10.7	1000	479	151.371	37.4145	0.165186	5.60481	8.71302	0.230005	0.43126	0.026137	0.021171	0.015682	6.74517	4.44354	0.900418	0.020125	0.487193	7.77156	1.78045	71.8691	109.931	74.1315	75.8696	41.696	33.3369	63.4096	97.6184	52.012	193.445	185.941	146.561
1.10.7	1000	480	24.9278	23.523	0.017823	1.24359	9.94505	0.071023	0.173103	0.001215	0.000675	0.006751	6.84945	4.42979	0.438968	0.007291	0.711585	1.01067	1.66635	73.8408	111.984	75.3701	76.7528	37.5668	30.0097	66.0165	104.872	53.9091	195.697	190.079	150.395
1.10.7	1000	481	63.7632	37.814	0.05627	1.89389	13.2251	0.172485	0.738861	0.018833	0.016996	0.018144	7.65342	5.55305	0.337391	0.030776	0.355305	3.32637	3.58819	101.383	138.342	96.0358	97.6842	58.5331	45.3581	86.819	117.954	65.7352	206.647	199.877	161.651
1.10.7	1000	482	11.7375	19.3705	0.010477	2.29191	11.5731	1.41822	2.09226	0	0.003201	0.170838	9.6851	17.927	7.68423	0.331199	0.16298	0.040745	0.003783	117.754	138.779	101.92	178.082	103.934	81.6767	180.946	172.524	109.814	222.558	207.041	173.369
1.10.7	1000	483	29.1626	31.2871	0.0987	28.6156	57.7293	22.7378	23.835	0.003014	0.023922	6.15653	37.7904	115.411	0.606141	5.26408	3.10755	0.001884	1.87964	82.2405	127.019	85.9974	80.7039	44.8712	37.0252	70.8612	111.693	60.3059	214.833	208.847	171.225
1.10.7	1000	484	12.7148	11.7211	0.068754	0.099857	0.467362	0.008799	0.032331	0.001842	0	0.020053	0.289953	0.040925	0.004706	0.014733	0.038674	183.507	11.8848	57.2777	85.3219	55.4717	74.6898	29.7471	22.2063	62.2462	80.8126	39.7348	177.303	163.667	125.916
1.10.7	1000	485	97.4228	53.4847	1.84411	43.3416	73.1877	35.7726	35.7558	0.026887	0.544647	15.9112	48.1924	136.91	0.544154	15.849	3.71312	0.021707	1.65688	95.8814	143.409	100.079	79.128	52.2501	43.6707	67.4327	109.089	61.7578	220.369	214.899	180.458
1.10.7	1000	486	20.8843	21.0544	0.351327	2.08463	6.01555	1.02836	0.459744	0.004117	0.000915	0.141812	8.57594	10.0425	86.5759	0.037511	0.502745	1.11436	1.2667	55.8952	92.4195	60.8792	98.1505	38.2164	29.6821	89.7091	107.821	55.3472	184.847	172.665	132.395
1.10.7	1000	487	25.1107	28.4402	0.300233	4.8211	79.2582	23.923	36.5761	0.804771	0.023853	4.55665	29.5771	56.67	10.5559	17.3614	22.8976	5.91003	240.304	60.3168	92.16	62.3259	79.3355	36.3796	30.3324	67.2608	121.042	61.727	213.464	208.106	169.839
1.10.7	1000	488	25.5503	36.6865	0.001295	1.19119	98.4655	23.3246	48.5655	0.467617	0.006995	1.89793	35.2746	68.9756	2.18964	35.1964	22.6959	0.539119	67.9373	72.2689	112.555	76.0684	76.7655	42.2179	36.0158	70.8655	140.594	73.0495	228.778	226.071	198.392
1.10.7	1000	489	243.714	89.3073	2.17046	41.5663	79.9872	37.3849	40.2798	0.049242	0.652462	19.0545	48.5696	118.267	0.421875	18.7169	2.48438	0.159091	9.33002	139.244	175.207	126.9	120.982	84.1837	65.5488	96.2353	122.047	74.5649	227.249	221.415	192.024
1.10.7	1000	490	37.6335	37.0639	0.091367	3.97508	45.7853	5.86761	15.3929	0.013843	0.009816	0.38812	20.7035	32.4772	1.14397	0.406746	9.24138	3.38283	161.195	96.373	133.433	93.7473	102.914	60.6023	48.0889	96.032	137.225	75.9439	223.283	217.8	185.393
1.10.7	1000	491	9.33255	3.41791	0.010879	0.005356	0.000167	0	0	0	0	0.002845	0	0.000335	0	0	0	0.001674	0	0.071967	0.20251	0.124351	0.252887	0.113975	0.093222	13.5622	12.682	10.2231	15.553	13.1178	11.3759
1.10.7	1000	492	45.5579	32.3581	0.056365	4.69224	10.3804	0.231247	0.460566	0.012645	0.007715	0.019503	11.8438	16.2795	0.57201	0.019074	1.56751	0.254179	3.12195	68.7049	112.724	75.785	72.0081	33.3011	27.9936	60.9261	94.7336	49.2707	186.216	180.436	141.394
1.10.7	1000	493	230.284	106.957	4.35482	16.689	47.4341	9.15157	13.2215	0.019685	0.036909	2.07382	16.7338	9.57234	2.58858	0.480807	0.376969	102.328	9.43406	132.36	165.202	119.599	127.215	82.1412	64.7987	105.757	133.748	79.842	232.227	227.171	205.196
1.10.7	1000	494	15.3906	14.9555	0.004613	0.053869	3.55595	0.007738	0.020833	0.000744	0	0.019643	0.381696	0.052381	0.08006	0.016369	0.019345	116.322	1.8939	98.367	129.66	91.2576	94.6403	56.1241	44.3473	84.8211	124.522	68.1076	228.539	222.812	194.896
1.10.7	1000	495	9.16637	4.07387	0	0	0	0	0	0	0	0	0	0	0	0.000601	0.002402	0.048048	0	7.05205	25.575	17.2725	16.0963	7.31151	10.0769	12.7265	12.6959	9.42222	19.393	16.209	15.7574
1.10.7	1000	496	11.0979	3.42014	0	0	0	0	0	0	0	0	0	0	0.000763	0	0	0.024669	0	8.07655	31.2363	18.2403	16.8309	10.5804	6.93362	13.1399	10.793	8.36928	14.5844	12.6981	9.33647
1.10.7	1000	497	128.736	88.7283	18.1132	67.2567	107.966	67.2842	61.3949	2.22528	10.0057	36.2838	69.1846	180.147	1.45912	44.1446	11.5716	0.026419	2.01	119.048	164.193	118.548	95.839	68.9104	56.5077	79.588	118.525	70.5544	227.733	222.748	192.895
1.10.7	1000	498	14.9087	23.3039	7.1748	25.7748	48.7496	10.9906	17.9717	0	0.223622	16.8677	21.5496	106.496	6.2189	14.3906	2.37953	0.201575	0.107087	4.67087	26.7417	14.211	29.2173	5.37795	4.90709	24.252	35.1433	16.3622	36.7417	31.9717	24.4016
1.10.7	1000	499	9.8638	4.1976	0	0	0	0	0	0	0	0	0	0	0.000279	0	0	0.009768	0	5.67234	26.9626	16.7572	12.9651	11.3078	6.57661	14.0204	12.1267	9.01005	19.2478	15.5384	12.607
1.10.7	1000	500	12.9044	14.1764	0.187975	0.463238	0.277074	0.018472	0.002173	0	0	0.521188	0.011952	0.287939	0.000362	0.04636	0.019196	250.52	56.121	176.911	194.913	155.737	146.99	112.204	91.9464	123.049	141.88	93.9772	232.265	226.331	212.511
1.10.7	1000	501	22.16	22.9171	0.117632	1.28584	9.38533	0.070914	0.202831	0.001416	0.000901	0.009524	6.67555	5.50759	0.425225	0.020463	0.606306	0.88417	1.29768	80.2412	114.791	77.5647	93.9969	46.7514	35.6411	83.3951	112.603	59.1667	195.53	187.542	147.362
1.10.7	1000	502	24.4215	33.5921	5.22255	54.6063	86.2565	53.4838	45.5595	0.024426	3.75428	24.0353	57.8142	157.417	0.690814	27.6666	9.54478	0.001461	0.432985	83.552	129.873	89.1082	75.7167	44.4696	37.8251	63.7156	108.627	59.2516	218.623	213.138	177.654
1.10.7	1000	503	61.6208	40.5101	0.242634	30.5232	62.3338	21.7502	25.9403	0.012298	0.024084	6.77043	37.6211	117.019	1.06585	6.28388	3.01332	0.015117	2.61107	95.4781	139.626	96.3664	87.8212	53.7914	43.4581	77.3477	117.776	65.5924	218.923	213.199	177.232
1.10.7	1000	504	11.1637	9.01614	0.059046	0.097151	0.038105	0.001373	0	0	0	0.07724	0.181943	0.00206	0	0	0	208.764	12.3962	41.3048	67.2963	43.0498	60.6375	23.9324	18.0906	48.6557	59.7027	29.3697	126.766	112.706	85.0549
1.10.7	1000	505	13.6714	11.7658	0.056914	0.038335	0.428034	0.00682	0.005644	0	0.000235	0.004233	0.140875	0.005644	0.003763	0.000706	0.000235	81.7999	0.515992	88.1131	114.865	78.587	73.1129	40.9384	31.8128	61.528	93.5992	49.0332	205.362	195.249	157.836
1.10.7	1000	506	95.7024	94.1046	8.21122	46.2624	51.1976	32.5983	27.3319	0.026112	0.301761	16.2333	48.5742	70.9977	0.025958	0.238721	0.46848	0.011897	0.71369	102.709	147.217	100.502	97.201	59.0201	46.4056	71.7951	89.1851	51.648	208.165	198.656	162.046
1.10.7	1000	507	14.5059	20.5774	0.001635	5.59175	16.3073	1.43604	2.81161	0.000817	0.000817	0.306089	16.2333	40.6747	5.08378	0.505517	0.52595	0.001226	0.002043	45.9567	73.7728	40.3147	147.738	45.2726	30.4189	152.654	127.64	61.9154	194.215	154.95	105.304
1.10.7	1000	508	107.626	88.8006	0.042892	7.68492	83.0108	18.5228	38.6388	0.072026	0.025627	2.70731	37.2004	64.5902	0.754518	19.7672	31.099	0.064742	87.8665	101.535	144.597	100.773	87.4664	59.1664	48.5128	78.0202	143.073	79.208	232.304	230.136	207.477
1.10.7	1000	509	36.102	32.9156	0.367572	20.9178	27.8217	7.76376	9.16801	0.011005	0.011739	1.50183	24.044	41.4571	0.541453	0.195891	126.224	1.05796	5.18929	70.9963	111.875	75.0455	81.0301	40.427	32.2913	67.6911	101.322	53.102	195.321	186.88	146.772
1.10.7	1000	510	0.00907	1.36357	0.000378	0	0.000378	0	0	0	0.014361	0	0	0	0.034769	0	0	0.034392	0	6.57029	16.4883	11.6659	13.4085	7.01625	8.55593	11.1277	10.9467	8.37226	14.7332	13.5299	11.8553
1.10.7	1000	511	155.924	176.818	0.027205	7.43397	57.593	11.6939	26.0787	0.01664	0.021395	1.33016	31.1875	37.5238	0.241416	2.27073	22.7361	1.24908	113.415	145.343	178.925	128.361	135.31	90.715	69.7554	105.293	128.974	77.206	230.485	225.317	199.883
1.10.7	1000	512	7.7208	3.91193	0.000352	0	0	0	0	0	0	0.004228	0.00458	0	0	0	0	0.015853	0.000528	5.34878	15.702	11.8179	13.7331	11.0224	8.08508	13.7851	14.3241	9.16893	13.5695	14.5897	10.4809
1.10.7	1000	513	31.8001	39.8939	0.016957	2.59496	68.0618	14.4421	32.1255	0.012839	0.005087	0.844961	29.9637	51.0218	0.460271	9.09714	161.133	0.34593	222.938	97.1182	136.325	96.3299	86.3811	58.7866	48.2265	78.1802	142.458	78.9506	231.786	229.02	204.509
1.10.7	1000	514	18.6976	25.2509	1.46442	16.3923	51.6807	10.8811	18.8511	0.026217	0.351124	5.60674	21.4176	86.5983	7.52528	9.12734	2.55524	0.5	0.15824	22.3184	57.1938	34.8296	73.8333	20.2659	17.9597	82.8137	81.0197	40.6423	84.5478	73.2191	54.1573
1.10.7	1000	515	177.571	90.5865	9.3472	51.7707	62.4266	41.3002	35.5187	0.015665	0.668978	21.1975	53.123	111.269	0.078582	3.31895	0.850026	0.059065	0.446328	99.1641	143.98	98.0077	86.8919	55.1559	44.1466	66.641	92.1615	52.6156	209.955	201.273	164.897
1.10.7	1000	516	248.718	133.457	1.74414	28.2192	73.0033	29.0868	36.4424	0.06999	0.105976	10.3975	37.8171	67.0763	3.27897	5.69957	1.66491	1.05909	7.66788	152.876	183.002	134.144	144.461	100.028	77.0683	117.657	134.665	84.2493	229.251	222.5	194.065
1.10.7	1000	517	130.628	59.8697	1.64307	14.4781	45.8086	8.48224	15.4726	0.027816	0.018728	0.7458	22.8411	27.984	1.6293	0.533186	1.88488	3.24098	8.81823	93.5974	134.703	93.743	92.4252	55.5599	44.3118	81.978	125.473	68.6739	219.373	214.071	180.078
1.10.7	1000	518	13.4871	15.8175	0.005463	0.218823	0.713282	0.019666	0.044014	0.001093	0.000156	0.002497	1.58748	1.79273	1.44904	0.003434	0.002809	0.092555	0.012799	35.6273	71.1992	43.9249	102.225	30.5717	22.9758	104.534	99.0576	48.6529	159.716	139.686	101.053
1.10.7	1000	519	232.476	72.6385	0.447072	25.299	62.1819	20.7703	27.366	0.036036	0.039414	5.57883	33.2128	73.6554	1.19313	3.63795	2.44651	0.354167	11.9234	138.717	173.509	126.283	116.732	79.8102	61.7601	95.0557	122.389	73.5997	224.387	218.255	186.988
1.10.7	1000	520	18.7376	25.9753	0.035744	6.06207	19.2311	3.06401	3.81934	0.002217	0.007204	0.365752	17.969	51.3588	2.18038	0.765586	0.435855	0.027709	0.102244	88.6489	126.654	89.6198	133.448	65.6398	52.2943	132.167	141.052	81.1881	206.768	194.794	158.183
1.10.7	1000	521	68.7389	74.4844	6.6572	47.3852	70.6525	39.1023	35.7482	0.062646	0.925681	18.2187	48.9685	93.5961	1.89844	9.97198	3.38872	0.068872	0.238911	87.9712	123.104	83.2782	137.547	67.5276	52.6739	130.894	133.129	75.6634	219.207	202.782	166.339
1.10.7	1000	522	13.2458	11.9408	0.013597	0.022779	0.225499	0.002825	0.009536	0.000177	0.000177	0.015893	0.123786	0.014657	0.011831	0.001589	0.007946	95.7224	1.1282	71.0528	97.0814	64.9497	70.3069	32.8609	25.3318	58.9928	83.38	42.4325	178.906	167.433	129.385
1.10.7	1000	523	8.46813	3.94745	0	0	0.002433	0	0	0	0	0.003893	0.000487	0.014599	0	0	0	0.019465	0	0.232603	0.652555	0.410706	14.4696	9.9854	9.31582	13.7586	12.9465	10.1659	17.9635	15.8292	14.1912
1.10.7	1000	524	148.679	101.149	2.0345	33.6803	44.3355	21.0034	20.2528	0.019142	0.027345	7.42785	37.3551	49.6857	0.200252	0.153134	2.15692	0.122844	2.31573	101.011	143.983	98.7812	95.9514	57.4947	45.4018	74.2335	97.3359	55.3115	209.991	201.281	164.911
1.10.7	1000	525	102.382	74.575	0.580468	3.63274	3.4608	1.15406	0.921596	0.02751	0.019257	0.645117	6.34663	5.63962	4.04677	0.068776	1.50344	3.88996	1.21871	11.1376	36.9051	23.2861	38.3783	10.2779	9.72902	28.0591	36.1513	17.6066	59.0908	53.2668	41.575
1.10.7	1000	526	250.484	247.864	0.07569	5.93945	31.6137	3.31078	11.1761	0.008905	0.0187	0.702939	20.2071	16.2632	0.368833	0.00089	0.665717	0.976313	2.47302	167.742	195.953	143.533	165.75	116.766	88.5541	126.884	115.409	76.1576	227.616	217.496	187.608
1.10.7	1000	527	10.6545	7.91472	0.000311	0.043573	0.021786	0.004046	0.09057	0.065982	0	0.029256	0.100529	0.000311	0.000311	0	0.001867	176.859	3.86025	76.1889	97.0685	65.8142	80.7314	46.3993	35.5076	65.6256	71.9465	40.8895	144.441	126.385	96.535
1.10.7	1000	528	179.098	167.006	0.564335	21.5545	33.2066	10.7403	13.3267	0.01575	0.019754	3.75761	31.051	32.9023	0.164175	0.01842	0.968233	0.214629	1.84784	136.173	170.34	118.341	137.589	86.2192	64.4306	103.049	100.287	60.9915	215.049	202.069	166.609
1.10.7	1000	529	13.9175	15.1662	0.228917	0.249374	4.52268	0.027554	0.050793	0.000557	0.002087	0.010715	1.36293	0.391595	0.102421	0.001252	0.005984	104.395	4.95449	64.8114	97.8613	66.1296	84.8858	39.3518	30.6209	74.6804	109.602	56.2249	205.702	197.782	159.637
1.10.7	1000	530	249.72	111.444	0.191532	33.3774	59.8315	19.2594	23.5282	0.019993	0.03797	8.83484	40.3115	106.983	0.099126	1.96774	1.13054	0.023185	0.786122	119.582	161.826	112.889	101.31	69.64	54.5985	78.5796	100.99	60.0689	217.842	210.003	175.332
1.10.7	1000	531	10.2091	8.06754	0.011983	0.079158	0.000363	0.036674	0.276325	0.178649	0	0.002905	0.006173	0	0	0	0.287219	243.509	29.1042	82.9165	102.162	73.2781	98.7527	67.3707	53.898	78.9252	84.658	53.3838	104.218	95.5614	76.8253
1.10.7	1000	532	252.961	221.231	1.23408	33.4817	69.1682	29.9585	36.5346	0.019261	0.036191	13.226	43.2669	85.0834	0.724604	1.85213	1.51149	0.156104	2.06866	154.286	189.674	138.424	141.387	100.242	77.1803	106.175	111.441	71.1378	226.482	218.419	189.233
1.10.7	1000	533	14.351	11.1565	0.001669	0.221619	1.80885	0.039232	0.266694	0.000835	0.035893	0.121035	0.684891	0.853923	0.170701	0.279633	0.196995	0.468698	0.017947	2.24708	23.8493	15.4612	10.5735	2.4929	2.85476	7.43155	9.33222	4.71119	15.4144	14.1661	14.9341
1.10.7	1000	534	23.7058	23.1315	0.110252	1.01649	13.1383	0.111669	0.434441	0.003091	0.001417	0.054997	5.91705	2.77628	0.517774	0.014683	0.489825	2.23055	1.65958	89.559	124.516	85.7464	90.0936	51.143	39.6095	80.4107	119.026	63.8932	207.37	201.329	162.584
1.10.7	1000	535	87.9677	81.8176	0.059239	3.88926	61.2386	9.92326	26.7425	0.02962	0.025244	0.480646	27.135	30.4864	0.455066	3.65735	26.6439	1.06261	95.347	126.226	163.685	119.519	110.742	78.8065	63.6557	94.381	141.477	82.9593	232.532	229.355	206.547
1.10.7	1000	536	15.8157	20.2584	0.246195	3.10391	9.14924	0.898081	1.20417	0.000662	0.003971	0.150232	9.99835	18.9715	2.26009	0.045665	0.275314	0.389477	0.264725	29.3127	65.2237	39.6688	87.8696	19.2336	15.232	81.4011	84.9603	38.7469	161.884	142.99	105.45
1.10.7	1000	537	28.8435	38.8516	0.002859	0.526918	70.6725	9.83278	31.6653	0.01596	0.004526	0.156741	27.0893	33.5438	0.005955	9.95355	69.9597	0.177942	72.2754	99.8309	142.884	101.884	84.1641	62.2909	51.631	76.607	149.423	84.1956	234.429	232.431	211.979
1.10.7	1000	538	10.4027	7.80115	0.009904	0.044045	0.053948	0.002346	0	0	0	0	0.003649	0	0.006255	0.000261	0.003649	246.681	27.7204	115.599	133.966	96.1884	103.584	69.2022	54.4053	83.3987	91.5718	56.4034	179.263	161.07	129.803
1.10.7	1000	539	14.5071	17.1714	0.494637	0.952218	14.9832	0.269137	0.491711	0.001463	0.000244	0.28864	3.89859	1.90492	0.810093	0.007557	0.085812	171.648	19.167	75.4634	109.917	74.4295	99.9859	48.1248	37.3315	89.6726	126.553	66.4376	220.821	213.959	179.883
1.10.7	1000	540	14.2455	15.9478	0.034222	0.169542	7.7141	0.010694	0.122344	0.000428	0.034222	0.02695	2.02381	1.00385	0.073007	0.005133	0.007415	125.317	6.7094	75.3536	107.952	73.7304	96.8412	48.1081	37.4402	86.9702	120.059	63.4998	214.188	206.316	169.853
1.10.7	1000	541	105.149	56.6218	0.009052	2.5793	17.0945	0.86344	2.85439	0.019284	0.025974	0.049587	11.3416	12.7147	1.04723	0.055884	4.756	9.9941	150.567	82.5458	119.237	80.6438	90.0464	46.0575	36.442	75.1189	102.902	55.1157	201.599	192.254	154.368
1.10.7	1000	542	14.662	17.6552	0.471135	0.688262	11.258	0.12492	0.163887	0.000321	0.011386	0.01347	4.50802	1.65988	1.50962	0.007537	0.012668	50.0563	5.72033	61.9168	96.0994	64.7425	86.6519	42.1155	33.0364	78.478	121.637	62.7308	210.535	204.618	165.963
1.10.7	1000	543	7.74229	3.89836	0	0	0	0	0	0	0	0	0	0	0	0	0	0.025751	0	5.42548	17.7585	10.0181	15.7072	10.6268	7.38471	14.0814	11.5002	9.21732	14.0419	12.2918	13.159
1.10.7	1000	544	16.0391	24.6327	0.039429	13.798	33.5783	7.26249	9.87195	0.002253	0.004131	1.82764	24.4502	64.763	5.35637	2.44499	1.4694	0.002629	0.006759	41.5329	76.4424	44.7416	142.194	44.7559	33.6996	146.773	129.541	66.0146	199.56	169.568	126.125
1.10.7	1000	545	73.0412	67.6446	0.263712	6.08776	4.33041	0.975867	0.739359	0.022378	0.027205	0.371215	11.6165	7.35147	0.837209	0.03247	0.390961	2.81439	2.04958	67.7718	104.166	67.0706	91.9355	40.7679	30.1347	73.9526	78.7266	40.9908	167.631	151.104	113.549
1.10.7	1000	546	44.6053	28.9012	0.025054	1.65105	6.05701	0.087328	0.128359	0.009985	0.006718	0.007444	6.26852	6.53014	0.605483	0.014161	0.551561	1.12055	1.95806	81.482	119.789	81.073	87.4984	44.0103	34.4523	77.0703	104.881	55.6195	188.68	181.188	142.061
1.10.7	1000	547	15.9392	16.6968	0.261689	0.615897	6.53755	0.068291	0.086852	0.000992	0.01176	0.003825	2.32615	0.66081	0.183338	0.002267	0.008501	33.3049	0.939501	71.5237	103.79	70.3059	77.1804	40.4637	31.653	67.7308	108.068	55.6952	201.159	194.181	154.612
1.10.7	1000	548	8.07137	4.20396	0.00026	0.00547	0.000781	0	0	0	0	0.003386	0	0	0.004168	0.00026	0.001302	0.17218	0.00026	4.21933	12.746	7.6348	12.9031	7.15811	5.58739	13.1211	11.6061	7.99896	16.5978	14.3042	12.0479
1.10.7	1000	549	7.6897	3.91394	0	0	0	0	0	0	0	0	0.024561	0	0	0	0.008187	0.001398	0	7.35863	16.7484	13.1424	12.9533	11.4115	9.42931	13.876	12.763	8.55351	12.8714	10.4167	11.2268
1.10.7	1000	550	15.8402	28.1896	0.586712	27.9166	69.2626	25.9756	30.395	0.008278	0.212906	9.77308	37.0921	95.2619	7.5328	13.5619	4.75971	0.024835	0.051369	90.1779	124.068	84.4487	153.49	74.9478	58.204	152.648	155.936	89.935	224.233	210.366	173.393
1.10.7	1000	551	12.1024	10.9143	0.009998	0.095491	0.309937	0.008774	0.017343	0.000204	0	0.026729	0.305448	0.073454	0.045909	0.005509	0.002653	130.787	2.46317	67.9231	92.0037	61.1028	86.6915	40.9453	30.6042	74.0577	85.0359	44.4468	170.561	153.752	116.463
1.10.7	1000	552	204.465	128.092	12.2761	54.134	74.8268	47.9537	43.7291	0.023028	1.88021	25.3376	57.0519	108.51	0.427976	5.49241	0.878001	0.048751	0.83709	126.012	166.264	117.183	113.839	76.2472	59.3065	86.8665	103.117	62.4108	219.685	211.128	177.707
1.10.7	1000	553	13.5948	14.079	0.000247	0.103704	1.80593	0.019506	0.005679	0.000247	0.006667	0.015062	0.466667	0.120494	0.031852	0.003951	0.005185	132.604	4.41086	97.298	122.944	85.1694	109.928	62.7133	48.2328	98.2022	117.811	65.6679	208.595	196.04	157.618
1.10.7	1000	554	85.1739	57.6514	0.039882	4.15103	3.19756	0.432422	0.449409	0.030281	0.031388	0.172083	9.56352	9.74889	2.37703	0.07164	0.046898	0.272526	0.135155	57.8117	96.25	62.3386	123.67	46.784	35.8453	124.63	111.208	58.5439	182.771	160.177	121.977
1.10.7	1000	555	173.134	58.7106	0.15566	20.7465	31.4797	6.85	9.09127	0.025472	0.031368	0.890802	25.5217	59.2017	0.641038	0.097877	4.38703	0.150236	3.23042	81.3498	124.904	83.967	76.1672	42.0882	34.5448	63.0524	95.1736	50.8644	198.22	190.071	150.749
1.10.7	1000	556	9.80813	4.22118	0	0	0	0	0	0	0	0	0	0	0	0.000642	0	0.007701	0	9.16364	29.5996	19.0503	13.5604	9.4415	6.40941	13.9914	12.8501	10.4892	18.6975	15.24	15.5384
1.10.7	1000	557	18.7938	15.7572	0.015924	0.207006	13.4575	0.028025	0.135828	0.000159	0.000159	0.06035	0.525796	0.055255	0.152707	0.003822	0.009395	142.96	3.55701	124.147	154.308	112.6	100.975	66.2311	52.8443	89.4497	135.486	76.3443	236.367	233.796	219.55
1.10.7	1000	558	15.1425	14.0677	0.015113	0.074727	3.01651	0.054576	0.048699	0	0	0.001959	0.475511	0.097677	0.011755	0.00084	0	143.284	5.05514	73.2552	108.144	73.4221	76.3039	36.9759	28.9118	66.0243	108.34	54.9661	223.92	217.733	187.726
1.10.7	1000	559	13.0196	12.0731	0.12113	0.4914	0.473656	0.019011	0.064639	0.001267	0	0.092884	0.54952	0.78327	0.420062	0.015933	0.245338	2.67916	1.25856	26.5944	50.7027	30.2399	56.5942	17.2651	12.0974	43.837	48.9638	21.891	103.762	89.5894	61.824
1.10.7	1000	560	252.754	232.084	0.613505	21.2007	50.3872	16.6013	23.3963	0.014832	0.020764	4.99721	33.141	56.4238	1.47112	0.129471	1.59745	0.067004	2.00471	144.229	181.265	130.74	133.343	92.7402	72.2549	100.452	108.803	68.5324	221.935	213.037	181.93
1.10.7	1000	561	158.361	56.5472	0.01962	19.6444	43.6885	10.3966	14.9798	0.03109	0.044974	1.5406	28.0903	75.3148	2.39752	0.528524	4.27377	0.050709	5.92665	100.317	142.144	97.7763	94.0761	56.1745	44.2454	82.134	117.129	64.7129	213.439	207.271	170.417
1.10.7	1000	562	13.7713	19.0245	0.089295	1.67572	6.61044	0.873107	1.21932	0.000522	0.000522	0.219843	6.7107	14.1723	206.68	0.982245	0.677285	0.630809	0.143081	60.4883	93.4261	62.5446	154.206	62.3781	48.7071	161.468	150.702	85.5248	202.322	179.681	139.265
1.10.7	1000	563	20.1032	31.8053	1.94392	34.6955	77.5315	29.1051	33.9062	0.007788	0.211059	13.2683	39.5047	83.8248	3.2243	16.2796	7.59502	0.078271	0.054128	49.2021	77.1799	46.6846	130.004	39.5607	31.2679	125.546	116.431	57.3594	202.301	171.234	131.408
1.10.7	1000	564	69.0347	69.7974	28.9021	68.5406	80.1931	56.3852	47.4579	0.125412	5.96319	32.4478	67.8063	127.797	0.074529	17.349	4.25172	0.015265	2.16791	89.7237	137.877	95.589	78.1628	48.2344	40.6791	63.3873	97.7384	55.1739	213.963	206.892	171.082
1.10.7	1000	565	24.3603	28.1548	0.001325	1.61912	37.0874	3.87149	11.4409	0.005962	0.000662	0.30934	17.9916	22.9753	2.02981	0.457938	8.34886	4.48797	167.018	73.1638	109.277	74.6949	87.4072	44.5487	36.0057	79.2581	127.53	66.9245	216.52	211.509	175.767
1.10.7	1000	566	17.3097	23.0261	0.137059	8.27227	20.4779	2.76146	3.59937	0.001845	0.016605	0.417501	17.8002	40.3071	1.57749	0.293622	0.657617	0.251713	1.03532	46.1687	82.2649	51.1639	95.6065	29.2949	22.3374	88.4752	95.5306	45.51	180.599	161.928	119.833
1.10.7	1000	567	10.7628	8.4122	0.007057	0.034039	0.089249	0.000208	0.011416	0	0	0.026982	0.120589	0.196762	0.628684	0.000623	0.001245	0.106476	0.030511	4.34745	25.8311	12.3638	27.8217	4.70195	2.36135	25.6619	24.0882	6.52823	34.8207	26.2804	16.3892
1.10.7	1000	568	21.8764	30.5415	0.352556	36.4548	80.6601	32.6163	35.0612	0.010803	0.337492	14.5739	45.6099	147.245	1.30828	24.691	5.80006	0.117012	0.396074	98.4489	142.97	99.9638	93.7646	55.3688	45.5536	81.7675	127.704	71.2506	224.654	219.765	186.451
1.10.7	1000	569	21.292	23.7655	7.83741	15.3685	86.8894	14.5107	28.634	0.32212	0.007136	3.28389	21.4195	23.1809	1.91132	9.15851	0.851682	127.987	23.7508	106.834	143.354	102.135	108.567	66.0372	53.2783	100.59	157.709	88.4037	236.611	234.41	218.532
1.10.7	1000	570	196.983	147.702	2.61455	30.9948	62.3634	25.8775	30.8998	0.035131	0.059129	10.3681	40.2261	59.0849	2.04923	2.09476	2.40772	0.587086	6.89015	139.732	174.283	124.554	133.018	88.6472	67.9748	105.089	121.867	73.5062	225.987	218.603	187.773
1.10.7	1000	571	238.241	32.0683	0.018942	1.45028	0.355564	0.065114	0.10221	0.04341	0.013023	0.027624	0.203631	0.270718	0.102999	0.023283	1.80347	1.53157	0.726125	36.6468	68.8899	46.3477	47.1689	26.5051	22.3283	31.9807	38.792	23.9073	84.4917	76.6172	60.2218
1.10.7	1000	572	9.40023	7.20948	0.039497	0.042715	0.014336	0.000293	0	0	0	0.02282	0.00117	0	0	0	0.725278	239.569	22.134	41.78	66.1012	45.7019	64.2001	40.2086	32.3051	49.5275	57.3049	33.9845	70.8964	66.8809	53.3183
1.10.7	1000	573	15.0417	20.1504	0.050127	0.74402	3.68906	0.370992	0.364122	0.002036	0.004071	0.030789	4.47786	5.39084	2.38448	0.073028	0.041221	0.225954	0.114504	85.0863	121.12	86.8758	133.045	68.2674	55.8232	133.882	138.208	82.7547	198.861	186.603	149.307
1.10.7	1000	574	11.6103	9.16271	0.024802	0.102065	0.07077	0.001688	0.008311	0	0	0.033502	0.092326	0.226334	0.736917	0.001299	0.081418	0.241527	0.045708	18.0273	45.5284	25.1967	61.5488	17.023	10.3961	65.3755	58.5764	24.8825	79.3289	63.4811	41.0565
1.10.7	1000	575	253.62	128.652	0.000629	20.4868	40.0208	6.42764	10.4088	0.016779	0.028943	1.40038	29.5128	68.5294	0.0625	0.068372	0.477768	0.021393	0.410025	114.277	157.199	107.62	99.8448	66.664	51.8953	73.5587	84.6776	50.7708	205.791	194.268	157.624
1.10.7	1000	576	13.181	11.2411	0.000738	0.027486	0.467257	0.004243	0.013466	0.000184	0.000369	0.001291	0.087622	0.015495	0.029884	0.000553	0.009039	118.866	1.03597	101.567	126.014	87.6012	83.9609	49.1336	38.2571	70.5589	98.0944	53.397	212.804	201.609	165.499
1.10.7	1000	577	15.5732	15.7636	0.137165	0.386782	6.54751	0.044061	0.01705	0.000575	0.018199	0.000766	1.59885	0.269157	0.231609	0.020881	0.001341	86.6989	2.56763	71.2193	105.962	72.322	86.7213	44.6946	34.9891	78.0875	118.406	61.7929	217.95	211.424	176.463
1.10.7	1000	578	199.679	90.6899	0.329653	8.04854	18.6101	1.13573	2.60731	0.021394	0.025305	0.085806	13.9347	11.4739	1.54267	0.025535	0.461238	3.49851	3.32321	103.674	141.03	97.0055	102.308	61.2933	47.3101	83.8213	108.948	61.3264	208.003	199.208	161.79
1.10.7	1000	579	7.79222	3.98819	0	0	0	0	0	0.000611	0	0.000204	0	0.002648	0.002648	0	0.024037	0.044816	0	8.30556	15.6523	10.3084	13.2237	9.09289	6.9283	11.4276	12.2579	8.36402	15.9597	11.3245	9.80648
1.10.7	1000	580	86.2986	86.2353	0.170994	13.4655	43.3201	10.2989	16.7571	0.018683	0.028499	1.08961	27.7435	41.8198	0.674161	0.153895	3.83186	0.144712	73.9275	105.963	145.718	100.632	109.257	61.8357	47.8835	91.7115	116.803	64.8898	217.407	209.661	174.402
1.10.7	1000	581	38.5175	30.1741	0.007831	21.6795	48.9524	12.841	16.513	0.004819	0.006325	1.78464	29.0494	81.0286	0.381627	1.77982	3.9238	0.090964	1.15904	100.787	144.121	101.555	82.0723	55.7654	45.309	68.3093	113.008	63.9982	215.51	210.824	174.292
1.10.7	1000	582	10.4039	3.22736	0	0	0	0	0	0	0	0	0	0	0	0	0	0.003026	0	6.45948	30.6103	18.1407	16.1346	10.5738	10.5057	10.9991	11.5909	8.18003	14.5719	11.7713	9.58029
1.10.7	1000	583	250.63	177.219	3.70163	40.8624	85.26	40.7756	45.9641	0.037818	0.469973	19.5004	49.0279	99.7341	0.740973	9.09996	0.72824	0.062334	1.36944	159.578	192.257	142.093	141.829	101.833	78.9789	107.139	119.082	76.111	229.837	223.416	196.026
1.10.7	1000	584	134.824	93.9176	0.902482	4.44238	5.00887	1.26064	1.31206	0.029255	0.026596	0.796099	8.77837	6.48138	5.20213	0.08156	0.411348	4.54167	3.44326	38.5869	73.2314	45.7296	63.8573	20.8112	16.6791	46.2305	54.391	25.9672	124.991	111.473	83.2952
1.10.7	1000	585	102.202	123.392	0.440044	12.1372	37.3022	7.74801	12.406	0.022345	0.025221	1.08916	25.6146	26.7945	1.05022	0.124336	1.05863	0.692478	3.9177	132.7	168.385	119.604	134.842	85.7007	65.5049	111.429	123.872	73.6002	222.138	214.004	181.379
1.10.7	1000	586	243.45	93.4585	0.598064	29.4116	62.476	26.8704	30.5831	0.033729	0.048407	8.42474	37.346	76.6721	1.47314	3.51749	2.17458	0.530606	6.45315	115.466	156.584	110.371	107.061	69.1218	54.4582	90.2136	120.083	69.47	221.609	215.112	182.25
1.10.7	1000	587	12.3705	8.30222	0.020829	0.029441	0.052273	0.0002	0	0.000401	0.0002	0.01442	0	0.0002	0	0.0002	0	249.818	30.7655	156.239	176.345	133.567	114.339	81.741	65.1758	90.3707	108.456	67.156	232.302	224.425	202.537
1.10.7	1000	588	72.6757	72.7847	9.04793	50.4743	61.1963	38.7965	33.6437	0.027494	0.797754	18.7347	51.9344	95.208	0.132431	3.1844	1.59695	0.026054	1.46754	92.0946	139.257	95.8497	84.4459	51.4624	42.0859	67.2264	96.8034	54.8067	212.206	204.718	168.321
1.10.7	1000	589	175.681	76.318	1.54505	32.3834	65.6452	29.3857	32.7309	0.092756	0.111602	9.27473	38.7998	69.9962	0.957597	6.45259	3.80271	0.981154	5.18551	101.468	146.236	102.686	90.7052	58.7058	47.5371	76.4037	114.649	65.1372	220.413	214.676	181.327
1.10.7	1000	590	94.598	58.7301	10.9275	59.7641	89.8554	54.2789	48.8917	0.095437	4.0677	27.5556	61.292	167.908	0.257083	30.9851	8.16612	0.020579	1.2714	95.8425	143.964	101.089	76.884	52.0254	44.1998	64.921	107.503	61.3677	221.335	215.988	182.614
1.10.7	1000	591	9.13441	3.95828	0	0	0	0	0	0	0	0	0	0	0	0	0	0.000215	0	7.46516	27.377	17.3069	16.1452	11.1817	7.52624	12.088	12.8916	9.57419	16.3396	14.6381	15.6222
1.10.7	1000	592	22.1896	27.1214	0.013993	11.4621	32.8679	7.49707	9.18939	0.023755	0.007647	0.462089	23.9583	58.3772	1.53954	0.248292	4.03921	0.097624	1.74325	69.5351	111.246	74.6409	96.9234	42.6772	34.0814	89.3418	120.983	62.9401	208.734	201.226	161.477
1.10.7	1000	593	27.5707	25.6597	0.286032	3.51557	17.0547	9.95018	3.32651	0.004893	0.017349	1.11121	17.5418	23.9729	143.759	0.834075	4.10676	2.47198	5.54448	62.871	101.113	67.2269	89.778	38.8141	30.8928	78.21	115.738	59.3305	199.74	192.976	152.548
1.10.7	1000	594	25.6621	7.26976	0.005019	0.006274	0.000418	0	0.000418	0	0	0	0.005437	0.14931	0.000836	0.000836	0.051443	0.181514	0.000836	7.35383	31.3827	20.0448	17.4157	8.84567	7.86951	15.0941	12.4391	8.39356	21.5709	16.3919	14.1932
1.10.7	1000	595	23.1013	25.3055	0.102808	7.49931	12.5402	0.750069	0.93559	0.002202	0.000963	0.066199	15.0184	26.3761	0.595789	0.044591	2.74773	0.200385	2.25007	61.0841	100.658	66.0153	81.7234	33.3592	26.3313	68.5028	96.3661	48.2285	187.607	178.557	137.941
1.10.7	1000	596	251.972	243.148	2.14545	27.0708	65.5287	25.5812	34.5151	0.014902	0.022819	11.0818	39.9022	64.7301	1.29572	1.04874	1.87597	0.33887	4.66889	168.85	198.621	146.985	162.083	115.976	88.1993	124.457	121.11	78.8249	230.071	222.376	195.098
1.10.7	1000	597	8.46165	3.89258	0	0	0	0	0	0	0	0	0	0	0	0.000178	0	0.005682	0	6.10032	25.5005	16.4577	16.2021	10.2081	10.9004	12.334	12.3271	9.98029	15.7694	15.9311	11.7383
1.10.7	1000	598	30.5273	29.7499	0.807744	8.25034	29.8008	12.2837	8.16886	0.004302	0.040871	1.86636	23.7709	43.7518	71.6217	1.74106	2.24092	0.653401	2.48857	74.2673	114.112	76.6179	88.5332	42.9621	34.2468	79.4262	123.549	64.0645	209.375	203.611	163.755
1.10.7	1000	599	92.164	62.2662	1.25822	26.437	53.6732	20.0965	23.7208	0.029237	0.026391	4.489	34.2323	54.6331	1.48667	1.42303	3.20362	0.461578	4.48745	86.7097	131.046	90.6065	86.6437	49.4479	40.3583	75.259	115.574	62.8906	215.753	209.888	174.43
1.10.7	1000	600	150.654	87.2281	0.165245	7.91507	61.221	15.8284	29.1624	0.040156	0.028429	2.00604	30.4357	50.554	1.24272	5.5231	68.6091	0.371357	210.526	104.453	143.71	100.482	92.9375	61.4989	49.4915	78.8252	131.497	73.4659	227.745	223.894	195.977
1.10.7	1000	601	24.2271	23.1891	0.02129	0.51221	9.15905	0.061991	0.52369	0.002713	0.002087	0.021916	6.53788	5.72386	0.490503	0.04258	1.88645	4.91964	53.7293	75.6452	109.43	73.7184	91.5224	45.0854	34.5318	79.149	107.52	56.2275	196.04	187.159	147.662
1.10.7	1000	602	15.6153	24.3499	0.208961	16.4983	49.752	10.3264	16.6794	0.004635	0.008111	3.43183	26.5365	50.0243	3.93781	3.93241	2.64928	0.044805	0.011974	32.6717	59.1464	33.428	120.835	27.2329	20.8281	118.999	102.849	46.9482	180.308	143.351	104.374
1.10.7	1000	603	105.834	46.3571	0.171274	15.9884	22.329	3.32114	4.33153	0.021409	0.019746	0.254833	20.5768	41.1887	0.726668	0.036583	3.65995	0.053211	2.04926	73.2158	116.35	77.6591	74.2326	36.6972	30.2925	61.588	93.5383	48.7988	192.624	184.486	144.909
1.10.7	1000	604	12.9729	11.888	0	0.032	0.627556	0.003556	0.002667	0.000444	0	0	0.379556	0.091556	0.086667	0.000889	0.005333	113.69	1.07822	50.4253	82.3253	53.5582	54.5769	18.9102	14.9467	43.7729	78.2258	36.1809	195.445	186.378	150.252
1.10.7	1000	605	12.1551	6.79989	0.001098	0.006313	0.015097	0	0	0	0	0.004117	0.009607	0.075487	0.054351	0	0.046116	0.06588	0.01345	7.63958	31.2514	16.9575	22.4277	9.30003	5.51139	22.0832	20.2298	8.5759	26.1117	20.6709	13.378
1.10.7	1000	606	7.93903	3.94132	0.000163	0	0	0	0	0	0	0	0	0	0	0	0.037757	0.002615	0	6.69353	18.3473	12.8962	16.7551	10.763	12.0654	13.9402	13.2584	9.65888	14.3328	10.9783	9.94214
1.10.7	1000	607	9.52612	6.69403	0.949627	2.04291	0.173507	0.003731	0.044776	0	0	16.2407	0.063433	0.059701	0.371269	0.001866	9.91418	26.8489	2.42537	4.25	21.1716	16.3321	33.2332	20.5989	18.7388	33.0373	38.597	25.9272	17.5653	20.7034	21.6399
1.10.7	1000	608	237.555	94.901	3.70039	47.3045	63.9581	35.3245	32.702	0.021146	0.253557	18.0524	49.75	124.476	0.130632	4.5087	0.781028	0.017589	0.668972	100.279	145.126	99.6245	84.0874	55.7158	45.4723	65.917	94.1723	54.1018	211.83	203.32	166.868
1.10.7	1000	609	12.0622	15.4608	0.000715	0.457625	1.41946	0.057882	0.088609	0.000715	0.00929	0.001858	2.47134	3.40789	2.22238	0.006717	0.014149	0.001286	0.005431	29.9062	63.6531	36.9295	135.869	36.3137	26.1112	143.37	121.384	59.6085	182.345	151.123	109.319
1.10.7	1000	610	13.2609	14.2738	0.258173	0.279541	2.41014	0.044491	0.08643	0.001595	0	0.014352	0.982299	0.347154	0.170946	0.004784	0.018498	91.9915	2.41126	52.0611	84.3905	56.1871	81.1322	33.4706	25.9313	69.804	98.4793	49.413	191.718	182.348	143.346
1.10.7	1000	611	16.7753	19.9616	0.098529	0.831577	5.47127	0.066614	0.042851	0.000597	0.004573	0.029032	4.94601	1.4655	1.02913	0.002287	0.107974	2.23444	1.00855	62.0042	96.3325	64.9155	88.1558	41.0341	32.0593	76.7061	108.756	56.3766	194.125	186.467	146.124
1.10.7	1000	612	239.128	171.352	18.0474	59.7655	108.028	62.6521	63.5111	1.04496	6.84528	33.6201	64.5075	136.991	0.559741	26.996	2.59781	0.076954	1.37343	162.457	194.397	145.598	143.154	104.577	81.3653	111.216	125.73	80.9822	231.519	225.925	200.39
1.10.7	1000	613	10.1594	3.44299	0	0	0	0	0	0	0	0	0	0	0	0	0	0	0	8.08783	31.3728	18.1361	14.4945	6.20592	10.7557	12.9691	12.1203	9.86769	15.6238	15.1253	12.8824
1.10.7	1000	614	15.3017	13.4274	0.011494	0.284222	2.21656	0.094305	0.018025	0.000261	0	0.001045	0.626698	0.062957	0.094828	0.000784	0.002351	90.0102	1.01698	66.838	101.313	67.5977	65.8694	31.3237	24.4963	55.2994	97.86	48.0969	219.507	212.745	180.473
1.10.7	1000	615	11.191	8.46667	0.002715	0.029864	0.13997	0.013876	0.042534	0.002413	0.000302	0.025641	0.133937	0.040422	0.002112	0.022624	0.102564	104.36	0.580995	75.3707	95.3231	64.6413	75.9478	40.6998	31.1885	62.0115	68.7548	38.2947	145.49	128.24	97.4492
1.10.7	1000	616	17.2997	19.6946	0.056474	0.962787	3.92013	0.043364	0.025817	0.000504	0.000202	0.017144	4.75141	1.31414	0.615571	0.002017	0.215309	1.50706	1.75887	61.5319	96.1277	64.2677	76.8034	36.2372	28.6237	63.931	97.5508	49.9437	188.23	180.923	140.567
1.10.7	1000	617	8.13266	4.13323	0	0	0	0	0	0	0	0	0	0	0	0	0.016559	0.035973	0	6.13837	17.6422	13.1011	15.6136	13.1603	11.4861	14.9273	13.9022	11.6751	15.9815	14.5034	12.2705
1.10.7	1000	618	16.713	22.2083	0.044014	8.47946	20.7459	3.08333	5.68016	0.003521	0.000587	1.48885	19.3116	69.0939	5.94249	3.31045	1.60094	0.046948	0.019953	28.8046	57.5317	29.6467	123.09	26.7083	17.7817	129.299	103.802	44.6643	158.697	114.178	72.9894
1.10.7	1000	619	43.9104	47.9318	11.3058	61.963	100.478	65.4815	45.9665	2.16243	3.99364	47.6734	57.3896	244.918	217.471	156.556	51.1711	0.980925	18.2526	95.1503	138.807	98.2	86.7526	65.1948	54.5156	74.0358	127.291	75.4971	228.89	223.877	194.497
1.10.7	1000	620	250.162	175.791	0.249241	9.7878	25.9156	3.2034	6.40073	0.019733	0.02793	0.396478	19.656	24.8352	1.17851	0.030662	1.71585	1.27808	4.20492	95.2298	139.542	97.5893	90.4824	54.5483	45.4854	72.7787	100.233	57.2292	202.4	194.397	158.875
1.10.7	1000	621	26.7082	25.9836	0.025738	1.19641	18.0181	0.426326	2.68544	0.002246	0.001382	0.079288	10.4939	10.8022	0.590257	0.073761	4.6502	3.56106	110.876	78.829	113.779	77.4747	93.7542	46.9421	36.7528	82.5757	114.954	60.7316	205.519	197.683	159.184
1.10.7	1000	622	10.2942	3.59597	0	0	0	0	0	0	0	0	0	0.00102	0	0	0	0.05455	0	8.35203	30.34	19.0665	14.7043	9.64262	8.61407	16.5274	16.3176	13.7298	14.3314	11.8132	10.4958
1.10.7	1000	623	12.7821	10.2539	0	0.021618	0.194566	0	0.001461	0	0	0	0.035641	0.001753	0.000292	0.000292	0	179.108	6.97049	88.2276	115.493	78.8636	75.3459	39.3728	30.5825	60.6532	87.1756	45.7607	212.066	201.157	166.129
1.10.7	1000	624	27.1371	24.6496	0.033322	0.709035	5.94023	0.094813	0.932326	0.004466	0.002748	0.010306	5.67434	4.64033	0.285125	0.022329	6.79938	7.6235	95.7063	43.9203	76.8121	49.0405	70.0653	22.5658	17.8066	53.4648	74.5125	35.3525	159.509	147.756	111.335
1.10.7	1000	625	14.5998	21.7625	0.002673	0.796869	2.99656	0.41428	0.385262	0.001909	0.003055	0.03131	4.66972	4.70523	2.22375	0.074838	0.054983	0.204658	0.192058	46.5323	93.1142	79.2245	136.654	66.0645	64.3761	145.444	142.637	93.3337	186.612	179.53	163.757
1.10.7	1000	626	16.5554	27.1162	0.291961	18.5762	56.3388	15.2277	19.6064	0.003092	0.009276	2.98344	29.1042	51.7387	1.72968	2.41851	1.42292	0.208039	0.333481	83.7796	119.901	82.8167	126.54	61.2237	47.9154	119.586	133.265	74.1084	216.33	203.695	164.994
1.10.7	1000	627	12.3661	9.4041	0.011988	0.136364	0.048951	0	0.001499	0	0	0.079421	0.097403	0.142358	0.017483	0.002498	0.101399	113.18	0.787712	106.87	121.719	84.8621	102.937	64.2952	49.2333	85.6908	91.2138	53.8437	169.722	146.635	112.883
1.10.7	1000	628	10.4386	4.84511	0	0	0	0	0	0	0	0	0	0	0	0.000834	0	0.002001	0	8.78459	33.1059	21.5497	16.4912	12.0922	10.367	13.6912	12.2426	9.99433	21.3823	18.602	15.7983
1.10.7	1000	629	247.089	121.533	6.75266	55.5932	91.8284	46.2599	45.5274	0.269406	2.17275	26.7972	58.5719	178.281	4.67846	32.2915	6.90829	0.028539	0.528539	117.005	163.349	117.021	92.1423	67.6979	56.4798	74.855	110.492	65.46	225.543	219.601	188.322
1.10.7	1000	630	7.65951	3.89302	0	0	0	0	0	0	0	0	0.010544	0	0	0	0.001917	0.008436	0	7.05867	16.1275	10.0464	12.2931	11.3177	8.73773	11.9908	10.626	9.6434	12.0732	11.3501	8.3936
1.10.7	1000	631	10.3004	3.20813	0	0	0	0	0	0	0	0	0	0	0	0	0	0.019239	0	6.90184	31.8813	19.8225	13.5214	7.61019	10.4823	12.0625	11.9115	9.15173	13.8522	10.864	10.8714
1.10.7	1000	632	15.5589	13.9792	0.008744	0.067156	2.57608	0.00787	0.011193	0	0.001924	0.000175	0.39944	0.029556	0.048793	0.033928	0.007695	85.4706	0.894194	93.414	123.189	85.8162	81.96	48.3632	38.0901	71.7336	111.325	59.5402	220.778	213.403	180.045
1.10.7	1000	633	108.135	63.4143	3.35541	42.3806	72.851	41.6066	39.8448	0.130635	0.783195	16.6363	47.2493	86.9558	0.754063	13.2245	6.46949	0.198712	2.28396	91.8209	140.176	98.027	78.5382	52.0613	43.2392	65.575	108.045	61.0276	219.218	213.763	179.538
1.10.7	1000	634	194.804	48.6623	0.274307	7.56005	13.9364	0.553014	1.28091	0.035416	0.027497	0.032556	9.98504	10.5996	0.806203	0.026617	0.944347	2.08029	3.17686	85.8251	126.125	85.8117	80.9835	47.2237	37.6078	68.3977	102.071	55.4479	197.5	190.058	151.126
1.10.7	1000	635	209.233	82.7161	0.447088	32.6267	50.0168	21.107	21.7701	0.021348	0.035377	7.40622	38.3916	93.9326	0.466606	0.774931	3.30467	0.036901	1.6746	97.126	141.928	97.0549	85.4504	53.233	43.1244	69.0012	98.9829	55.72	210.146	202.37	165.236
1.10.7	1000	636	17.7675	19.7076	0.205567	1.25496	2.9355	0.054336	0.047782	0.001235	0.00095	0.014819	4.7268	2.47953	0.659162	0.007979	0.438207	1.32393	1.32184	52.5686	87.2176	57.0113	75.4394	29.6733	23.2967	61.4304	89.5146	44.0689	177.628	168.886	128.388
1.10.7	1000	637	8.94507	3.35429	0	0	0	0	0	0	0	0	0	0	0	0	0	0	0	0.000441	0.000662	0.001985	0.001324	0.000441	0.001103	12.0042	10.6709	8.13678	0.079418	0.067726	0.063975
1.10.7	1000	638	242.532	97.4359	1.182	12.1568	37.9219	4.45938	10.2562	0.022644	0.024059	0.342202	18.3498	19.8667	1.3422	0.083498	1.44297	4.43646	8.2822	116.152	153.863	108.648	107.912	70.6405	55.5474	90.6312	123.679	71.5726	220.16	213.775	180.808
1.10.7	1000	639	74.8192	57.7585	0.507692	2.74154	2.96769	0.744615	0.878462	0.031538	0.017692	0.387692	7.00308	7.57615	4.77538	0.096923	0.096923	0.824615	0.416154	33.3631	69.2431	44.7392	92.9331	27.8046	23.6292	94.0638	85.8685	43.9231	137.525	117.269	89.6615
1.10.7	1000	640	37.1705	35.145	0.01247	5.92681	38.444	7.13229	13.0377	0.010572	0.002982	0.267281	22.3833	47.4844	0.637842	0.12334	5.67959	0.515858	230	79.0374	116.174	78.6403	89.9675	43.5712	34.9423	76.7319	111.577	58.2692	210.561	202.427	164.157
1.10.7	1000	641	13.9732	10.4387	0.000315	0.000315	1.91864	0	0	0	0	0	0.021129	0	0	0	0.000315	241.511	21.3336	115.076	144.035	102.036	86.5134	48.8962	38.31	68.7171	101.151	53.8691	234.342	229.374	209.5
1.10.7	1000	642	23.0157	28.9679	5.01351	33.2889	40.0749	18.7487	10.2414	0.002922	0.045654	22.7232	30.1684	224.254	42.7732	23.237	5.57085	0.239591	3.80898	65.63	104.27	71.4675	78.4858	44.1541	36.5409	65.2765	106.317	57.7115	210.18	202.028	163.961
1.10.7	1000	643	252.644	143.205	0.08704	33.4051	68.3558	21.8321	28.6277	0.018597	0.034893	10.4183	41.684	109.489	0.543137	4.24693	0.771089	0.022431	0.859279	135.869	175.64	125.509	116.265	81.232	63.3395	88.8553	107.624	65.4461	224.083	217.011	185.195
1.10.7	1000	644	10.3852	3.2989	0	0	0	0	0	0	0.001568	0	0	0	0	0	0	0.000672	0	6.7914	30.1586	19.2427	12.0755	11.1194	6.78445	12.7428	11.3406	9.24042	15.9713	10.8481	11.3213
1.10.7	1000	645	196.018	72.8005	0.293808	16.8349	37.2483	7.68656	11.829	0.022865	0.051396	0.853096	24.6866	50.0813	1.38264	0.151558	2.07102	0.217119	4.02367	104.486	144.652	99.2155	97.4976	58.5012	45.6196	82.0308	111.616	62.2602	211.039	203.646	166.639
1.10.7	1000	646	246.741	173.544	22.0213	61.8574	85.8278	57.3701	52.517	0.229727	4.27372	32.8931	64.5059	111.088	0.188625	6.94779	0.425017	0.062208	0.268385	142.387	179.705	129.016	129.948	89.6016	69.104	96.2086	103.751	65.1417	222.483	213.342	181.887
1.10.7	1000	647	105.441	119.889	1.38706	28.2447	55.3696	22.5721	26.1497	0.023161	0.042025	6.8522	38.4255	61.154	1.15521	0.73639	5.7426	0.11533	3.67502	116.637	157.371	110.208	114.658	69.8142	54.293	94.8243	119.352	68.4382	220.945	213.797	180.238
1.10.7	1000	648	25.6193	29.9093	0.112482	1.9862	40.1691	3.00021	11.6638	0.006272	0.002091	0.380723	16.8085	18.9352	1.98327	0.346435	8.62388	7.92264	100.405	90.8798	127.465	90.0569	101.14	60.2528	48.3446	97.1273	145.462	80.4648	225.025	220.922	190.19
1.10.7	1000	649	17.0787	15.9491	0.051448	0.289289	9.80011	0.179083	0.494799	0.000281	0.000281	0.475682	0.447849	0.531066	0.007872	0.067754	0.039359	163.344	6.49677	151.257	176.846	135.066	123.149	88.345	71.3011	108.209	147.694	89.9103	236.511	233.768	223.258
1.10.7	1000	650	108.507	102.594	3.73922	28.3429	45.7444	19.1879	20.9969	0.025667	0.068789	10.231	36.8522	51.2279	3.01951	2.83573	0.912731	0.123203	0.186858	49.691	81.4764	51.0698	120.38	40.8676	32.4846	116.028	105.395	54.7002	183.069	154.626	119.912
1.10.7	1000	651	8.94199	4.57735	0	0	0	0	0	0	0	0	0	0.000592	0	0	0.000197	0.052486	0.004736	7.90292	21.5381	11.8804	16.2285	12.5257	11.4041	14.7644	13.5272	10.6807	19.589	16.9832	15.395
1.10.7	1000	652	12.2708	12.807	0.000994	0.060373	0.291925	0.010683	0.037764	0.000497	0	0.008944	0.532422	1.12472	2.02286	0.010435	0.008199	0.027329	0.000994	11.9605	45.5677	27.3667	77.157	16.7215	15.1282	92.8343	85.8291	43.799	98.3443	85.7399	64.9116
1.10.7	1000	653	16.7202	21.2916	0.353207	1.28376	12.0825	0.307662	0.344709	0.000929	0.038906	0.034126	8.32678	3.08246	2.13517	0.011818	0.145532	5.31789	3.58107	55.8809	93.0769	63.2717	77.8365	37.4649	30.646	69.5715	117.463	61.0689	203.632	199.764	161.274
1.10.7	1000	654	18.579	32.4579	2.46992	40.4942	96.4802	46.7265	48.1917	0.099113	1.99279	20.6982	49.8009	111.216	1.56487	33.3712	10.7196	0.110618	0.490158	110.118	152.329	110.082	107.208	68.6863	55.9228	93.9031	141.195	82.584	229.635	225.046	195.091
1.10.7	1000	655	20.6697	21.4033	0.235453	7.3242	7.7951	0.186924	0.065379	0.000449	0.000449	0.220849	11.0393	3.27634	1.11189	0.180858	2.01842	0.520557	0.294316	54.5336	90.676	61.375	56.3321	33.5109	27.727	41.4071	74.8823	40.8382	185.397	178.247	138.603
1.10.7	1000	656	15.8175	13.7566	0.042306	0.291081	5.72607	0.138517	0.181313	0	0	0.063868	0.612218	0.348906	0.054721	0.010781	0.009964	243.665	27.7596	119.271	147.663	106.224	107.507	63.9716	50.8412	94.3045	130.737	73.3855	234.846	230.575	210.787
1.10.7	1000	657	204.699	109.624	2.62342	39.4557	57.6893	32.1243	30.6429	0.021289	0.210886	13.7939	44.2776	83.7273	0.553926	1.17433	1.57261	0.082346	1.17514	117.988	158.705	110.04	107.634	69.4013	53.623	82.2077	100.295	59.093	216.059	207.45	172.528
1.10.7	1000	658	16.3757	9.73506	0.054319	0.265814	0.108814	0.003154	0.01209	0.000876	0.078851	0.093745	0.086736	0.183284	0.209567	0.006483	0.432977	2.54635	0.358858	28.9816	55.2005	36.1186	49.2155	22.3082	17.8763	38.3426	42.8302	23.9793	80.1665	72.6723	54.1488
1.10.7	1000	659	179.684	197.473	0.656674	18.0678	51.7203	13.2883	21.947	0.020945	0.021766	3.30678	33.432	33.4682	1.52361	0.410678	2.6386	0.58768	11.1076	129.307	161.025	110.648	120.374	72.2411	54.2107	95.4945	119.031	67.4181	223.278	215.297	182.418
1.10.7	1000	660	19.7055	5.9446	0.006925	0.003259	0	0	0	0	0	0	0.000407	0	0	0.000815	0	0.043992	0	7.12709	26.0749	16.3752	15.8965	9.87251	8.16497	14.5189	12.053	8.35234	19.5316	15.6358	13.7821
1.10.7	1000	661	50.318	50.9595	6.30073	38.7837	75.8014	33.1211	37.1698	0.031021	0.155106	13.1176	45.1611	93.9268	0.576907	9.33908	3.67514	0.244722	39.1706	100.655	143.418	100.365	100.914	60.215	48.1788	92.8759	129.808	72.3025	224.94	219.264	186.658
1.10.7	1000	662	11.8391	8.7519	0.002845	0.035082	0.195006	0.01201	0.026233	0	0.017383	0.002845	0.072377	0.207965	0.290771	0.008534	0.048673	0.067004	0.014223	2.07396	20.2238	9.31037	12.8748	2.52023	1.5847	9.52307	10.2506	2.58123	15.7636	12.3262	8.42478
1.10.7	1000	663	12.9461	13.0392	0.045227	0.096123	0.60654	0.010417	0.025844	0	0.000264	0.012658	0.273339	0.069225	0.017405	0.002242	0.006593	89.8784	1.17155	72.808	100.042	67.3823	87.0907	42.769	32.371	75.9099	97.0737	50.7195	185.025	173.126	133.943
1.10.7	1000	664	14.736	23.0782	0.494411	22	62.1083	13.8934	19.8736	0.196045	0.104901	7.80739	30.8289	89.4377	117.334	16.8659	8.58297	0.125537	1.82631	55.0043	82.7902	47.5348	145.41	48.4239	35.4058	145.329	132.304	65.3981	196.967	163.34	113.735
1.10.7	1000	665	110.254	48.2934	0.211268	3.2831	9.83146	0.699531	0.793427	0.023944	0.010798	0.201878	5.01596	1.58545	0.295775	0.026291	0.040845	126.364	12.1235	91.8657	126.46	87.5319	100.028	55.7676	43.4577	85.3437	112.411	62.1263	213.96	204.619	170.473
1.10.7	1000	666	112.142	124.228	15.6731	52.2214	62.5721	34.9875	31.8186	0.015832	0.576325	22.0993	54.5853	60.5962	0.027451	0.120261	0.10472	0.031373	0.317647	128.801	168.013	117.756	119.426	78.28	60.2382	86.3622	94.2763	58.0996	216.075	205.883	171.659
1.10.7	1000	667	36.4132	35.9151	1.39656	22.0693	72.2832	35.8297	32.72	0.399248	0.695862	15.655	39.7802	117.715	122.707	33.0344	11.4922	1.02203	8.91456	91.4664	130.483	89.8522	100.665	55.9258	45.4401	91.7045	139.285	76.1397	223.232	217.271	182.13
1.10.7	1000	668	50.602	37.6906	0.10222	11.1943	17.0291	2.35384	2.6413	0.013414	0.020583	0.28654	18.9438	40.3504	0.703284	0.040472	2.28145	0.114246	1.94426	69.0664	107.766	70.7828	95.3511	40.1334	31.0631	84.3527	103.027	52.6434	192.126	179.571	138.639
1.10.7	1000	669	28.8844	33.9888	0.011466	1.85432	45.1742	6.86488	19.2152	0.003822	0.002473	0.169964	22.2936	29.8532	0.240782	0.636241	97.902	1.89119	229.819	86.0292	122.946	85.9499	85.5108	52.3606	42.8094	75.3611	130.325	70.7846	224.431	220.086	189.078
1.10.7	1000	670	9.38739	29.2387	78.2027	1.64865	1.78378	0.031532	0.085586	0.004505	0	0	87.3874	0.058559	0	108.829	28.1126	4.90541	8.04054	101.45	137.635	103.59	104.252	78.5766	65.3919	86.5901	134.977	82.1126	233.495	227.302	202.446
1.10.7	1000	671	13.9144	17.6885	0.005594	0.463855	2.48838	0.138554	0.315835	0.003442	0	0.086919	2.09466	2.53873	1.43761	0.056368	0.081756	0.79475	0.248709	26.5301	67.2775	54.1833	92.6794	35.7392	40.3713	99.5645	105.722	67.6622	140.754	137.744	126.008
1.10.7	1000	672	232.784	221.388	9.88108	46.5708	100.226	48.0314	55.627	0.676757	1.50595	24.1914	54.1582	85.0771	1.35784	14.445	1.47604	1.70955	2.72721	177.52	202.575	154.66	168.581	124.505	97.1975	132.236	136.173	90.4789	233.255	227.559	204.115
1.10.7	1000	673	19.3799	28.9277	0.549913	8.88595	37.206	6.31399	9.2545	0.007255	0.010737	1.36158	20.3381	26.96	4.37986	1.8404	0.633488	0.815438	1.99768	118.011	156.544	115.469	131.64	85.8323	67.509	122.062	151.002	91.605	225.996	219.919	187.89
1.10.7	1000	674	7.77448	4.04688	0.000181	0	0	0	0	0	0	0.000543	0	0.000362	0	0.00362	0.001086	0.008869	0.005611	4.9772	11.1788	10.669	16.0429	10.3508	11.6483	13.3276	11.6407	8.81122	14.4192	11.7993	10.4675
1.10.7	1000	675	96.2882	109.472	9.1174	51.1198	79.2289	42.9387	41.9412	0.032745	1.59635	22.2713	55.3762	100.228	0.17655	9.17051	2.2443	0.047231	1.3691	125.764	167.124	119.295	113.388	76.2143	60.2363	89.1194	111.303	66.8592	224.674	217.648	185.901
1.10.7	1000	676	7.84834	4.05328	0	0	0	0	0	0	0	0	0	0	0	0.000909	0.002182	0.039098	0	4.09638	14.7356	10.25	13.0926	11.6032	7.49609	14.1353	9.77214	7.59811	14.6485	10.6328	9.63721
1.10.7	1000	677	12.5872	14.391	0.098865	0.466627	0.601739	0.041255	0.024901	0	0.002063	0.080301	0.909091	0.723737	0.773538	0.018418	0.134227	2.45558	0.631943	28.9187	58.3729	37.8929	57.4529	19.668	16.001	44.5478	68.8037	33.4212	138.703	133.042	97.1988
1.10.7	1000	678	10.9968	10.0085	0.15873	0.453439	0.620106	0.021693	0.069312	0	0.001058	0.089947	0.659259	1.08042	1.31746	0.048677	0.213757	1.17778	0.559788	4.04074	15.218	7.34497	21.246	2.71323	1.90952	12.246	11.4032	3.31376	31.9751	22.7852	16.7307
1.10.7	1000	679	36.8139	28.5613	0.151286	4.60121	3.24508	0.301967	0.276248	0.007564	0.003933	0.078669	8.44417	9.03601	0.705598	0.020272	1.26899	0.697428	2.28018	37.4684	79.1843	50.816	59.1525	14.8384	13.5543	45.141	69.3038	32.4079	154.717	146.521	109.961
1.10.7	1000	680	10.0422	4.77268	0	0	0	0	0	0	0	0	0	0	0	0.001129	0	0.02691	0	8.83873	31.2691	19.9432	15.4419	11.0587	11.7552	14.8143	15.2676	9.17294	21.035	19.3013	17.3323
1.10.7	1000	681	9.33615	3.4455	0	0	0	0	0	0	0	0	0	0	0	0	0	0	0	0	0	0	0	0	0	15.376	11.2726	9.35015	0.065901	0.054947	0.051535
1.10.7	1000	682	102.758	116.549	12.7564	54.9794	97.3456	50.7931	51.1931	0.612034	4.80229	26.6596	58.2739	101.209	3.9404	21.1014	4.95817	0.029226	1.0447	156.121	182.175	138.182	153.497	110.826	88.1994	131.928	148.005	96.9605	231.484	224.15	198.159
1.10.7	1000	683	147.607	164.631	0.429659	5.02835	18.3646	1.79869	3.6664	0.013123	0.01916	0.176903	18.3073	8.85669	1.42021	0.017848	0.70105	1.29528	3.5399	136.286	169.768	118.623	140.483	87.1858	65.4139	108.775	106.119	64.4294	216.158	203.826	169.16
1.10.7	1000	684	9.89671	2.92216	0	0	0	0	0	0	0	0	0	0	0	0	0	0	0	99.6587	113.06	104.115	15.1961	10.4506	9.41018	11.7695	12.2171	9.33084	15.2904	13.5	11.6033
1.10.7	1000	685	239.884	236.247	0.002939	3.33585	70.1238	12.5432	33.7225	0.042401	0.026029	1.52477	32.3753	39.5097	0.009236	5.79849	103.93	0.023929	120.746	160.253	192.055	140.899	143.366	100.625	77.8031	107.302	133.984	82.5504	234.262	230.961	211.37
1.10.7	1000	686	10.4652	4.03285	0	0	0.006875	0	0	0	0	0	0	0	0.022154	0	0	0.030558	0	5.82658	26.4179	14.8189	3.59206	1.49427	1.49274	13.8923	13.2361	9.83957	17.7028	14.8999	13.0863
1.10.7	1000	687	220.195	126.573	0.574811	9.94804	56.2305	16.1779	25.7468	0.183492	0.047024	3.35679	28.6274	43.4877	3.24696	4.76389	22.0062	1.30977	216.012	115.224	150.695	105.443	109.946	70.3838	55.168	90.2749	128.453	73.094	224.535	218.757	187.634
1.10.7	1000	688	165.988	164.758	23.5797	54.507	55.4661	37.3982	31.0454	0.016869	0.235923	25.1235	54.8905	34.2628	0.13685	0.060584	0.059634	0.030649	0.038727	131.79	168.215	117.823	127.702	81.7458	62.398	92.3697	94.4407	59.0922	214.623	202.557	168.38
1.10.7	1000	689	114.069	117.97	0.531041	13.1284	13.4842	2.96166	2.93792	0.015825	0.029519	0.904139	21.8996	12.8369	0.481436	0.022824	0.581254	1.01126	2.29641	103.86	140.766	93.6528	111.214	60.9887	45.4047	83.2979	86.8046	49.4233	195.341	180.938	143.023
1.10.7	1000	690	9.26338	3.40911	0	0.004833	0.013383	0.004461	0.004647	0	0.000186	0	0	0.004089	0.000186	0	0	0	0	0.000743	0.004833	0.003346	0.002602	0.000743	0.000929	12.8981	14.127	8.74312	0.079368	0.066914	0.057621
1.10.7	1000	691	250.216	138.327	0.094617	6.10542	12.2518	0.500652	1.10728	0.021047	0.027193	0.045632	12.0007	5.87353	0.479791	0.021233	0.260942	1.34997	2.64779	100.109	140.57	97.0061	97.2012	60.2442	47.6832	73.3066	91.3792	53.4723	198.402	188.215	151.695
1.10.7	1000	692	176.57	143.537	1.06109	9.22267	18.4904	4.23473	5.14067	0.02492	0.032154	1.32797	19.5989	16.1463	7.53617	0.202572	1.05707	2.81913	3.84084	60.8633	95.3891	61.4003	87.4389	34.7814	27.4108	69.7854	83.705	42.8473	176.426	160.644	123.924
1.10.7	1000	693	12.9845	12.186	0.092636	0.191839	0.630863	0.019465	0.055113	0.001173	0.000235	0.047842	0.52228	0.219278	0.146576	0.021341	0.12031	56.0844	2.47608	66.1719	90.9275	60.9076	87.0167	41.9334	31.5288	73.7917	84.5122	44.7744	163.427	148.143	111.347
1.10.7	1000	694	194.199	137.814	0.244975	5.53133	18.8572	1.63396	3.73658	0.014897	0.024592	0.183968	15.4758	8.91535	1.31662	0.025065	0.407898	8.16127	6.58217	125.977	159.081	110.389	129.627	79.6382	60.0686	102.302	111.667	65.9142	217.359	206.586	170.9
1.10.7	1000	695	52.3951	26.5474	0.050753	1.17752	1.67045	0.041715	0.045886	0.01321	0.006489	0.00533	3.32769	2.7664	0.569177	0.012746	0.467671	1.67485	1.92515	78.0137	116.091	77.245	80.5669	38.6095	30.1124	68.6433	91.5537	47.9729	177.184	167.762	128.689
1.10.7	1000	696	15.8237	12.2858	0.006461	0.028827	1.25017	0.002319	0.001988	0.000166	0.000166	0.000166	0.065109	0.001988	0.01839	0.000994	0.002816	54.0615	0.044069	104.214	134.837	94.8998	76.2091	51.2084	40.6976	64.162	105.848	57.6867	231.575	226.536	201.378
1.10.7	1000	697	10.1561	7.57972	0	0.042632	0.033233	0.008056	0.002685	0	0	0.01242	0.08862	0.016448	0	0.000336	0.00235	161.019	2.28667	33.3632	55.8983	36.1121	52.8815	26.0191	20.042	41.0816	47.6767	25.0681	75.5509	68.1155	51.7445
1.10.7	1000	698	7.66379	3.88346	0	0	0	0	0	0	0	0	0.000184	0	0	0	0.029044	0.013971	0.003309	4.72426	15.0314	12.6265	16.6371	10.7053	8.40202	13.1612	10.4518	9.05533	11.621	12.6715	10.0687
1.10.7	1000	699	245.18	202.73	0.382735	10.9672	42.7769	21.2284	17.6662	0.022918	0.123759	5.61039	30.4492	36.903	110.186	2.08021	4.62567	0.39725	3.38961	144.044	175.645	127.04	141.099	93.1322	72.0749	110.304	124.652	76.3445	227.16	219.812	190.077
1.10.7	1000	700	25.2106	37.5293	0.007588	5.28954	75.5317	20.268	36.604	0.106948	0.002371	3.00379	36.1307	79.3424	0.72682	17.29	133.244	0.466445	234.978	75.188	115.6	78.4899	69.7771	40.8359	35.1594	58.6699	126.19	66.7199	227.405	224.786	197.106
1.10.7	1000	701	13.2207	12.7096	0.026215	0.066684	0.752609	0.010181	0.039196	0.000255	0.001527	0.012726	0.338763	0.157292	0.009926	0	0.004836	122.378	3.49325	45.7725	76.7653	50.213	69.4955	24.6055	19.0965	58.1474	82.7926	40.3675	176.548	166.127	128.719
1.10.7	1000	702	22.7459	21.3263	0	1.13383	22.6511	1.90376	7.12331	0.009023	0	0.181955	10.6782	15.1083	0.001504	2.0015	206.821	7.48421	179.935	42.3549	65.3579	40.0977	71.2601	23.6346	17.6827	49.8211	64.9233	29.5233	140.992	124.368	93.9188
1.10.7	1000	703	246.202	122.323	0.066086	18.7384	44.062	11.3982	17.2439	0.026137	0.036337	2.44156	28.7779	59.2023	1.91798	0.222907	1.86974	0.165746	3.40756	132.341	166.907	116.607	125.876	80.5812	60.7163	101.971	116.511	68.4609	219.278	210.316	175.398
1.10.7	1000	704	12.864	7.34926	0.025735	0.174632	0.191176	0.001838	0	0	0	0.009191	0.224265	0.09375	0.463235	0	0.540441	36.1287	0.272059	19.3272	34.7059	22.1452	29.8915	11.6857	9.87684	20.2812	19.6232	10.182	30.6838	23.4908	19.3879
1.10.7	1000	705	238.028	110.274	0.376979	15.5277	68.5795	22.156	34.6148	0.183377	0.036939	4.69657	33.3602	64.3654	1.79189	7.83278	13.2662	0.248681	111.397	126.953	164	116.623	114.337	76.0353	59.6626	93.8885	130.9	76.0838	227.994	222.971	195.181
1.10.7	1000	706	141.298	84.922	0.044089	6.33387	27.9712	2.60224	7.10479	0.024601	0.026518	0.341534	16.7665	17.9706	0.884984	0.048243	3.94441	7.08978	77.9738	98.7313	136.275	93.285	101.703	57.3955	44.5984	84.7026	113.863	62.8792	213.715	205.694	169.914
1.10.7	1000	707	48.9888	43.0469	0.146093	6.05889	33.5314	2.73499	7.43984	0.020102	0.011467	0.067525	16.9547	16.4792	0.943941	0.039354	0.690402	0.764156	3.18389	86.7295	128.438	89.2309	93.0098	51.2244	40.6826	84.9706	125.005	67.1236	213.037	207.734	171.204
1.10.7	1000	708	124.601	128.339	0.39964	10.5813	42.4905	7.93189	15.0645	0.025586	0.023063	0.975135	26.1023	23.3395	3.44793	0.203243	1.9773	1.83784	10.3247	100.18	138.414	94.738	102.311	56.9463	44.298	87.5312	124.124	67.542	219.443	213.208	178.928
1.10.7	1000	709	39.4846	29.2881	0.055507	12.5753	12.7685	0.926652	1.31498	0.005066	0.004405	0.131718	17.2341	39.6903	0.600661	0.015198	3.46652	0.059912	2.46322	59.6808	99.3159	64.302	74.8835	30.0896	24.3822	61.3454	84.8978	42.1769	177.312	166.103	125.928
1.10.7	1000	710	7.77527	3.9621	0	0	0	0	0	0	0	0	0	0	0	0	0.032159	0.043645	0	6.14893	13.4786	9.76742	15.0699	7.59514	8.83825	10.2144	10.4204	7.61945	12.1644	11.1273	8.53082
1.10.7	1000	711	106.916	116.721	2.12664	32.9639	42.475	19.5485	18.6957	0.016488	0.03438	7.40923	38.5418	43.8872	0.14822	0.025259	1.08016	0.064024	1.38625	118.712	158.55	109.492	116.38	71.6241	54.8135	86.3855	95.2119	56.9026	211.087	200.278	164.591
1.10.7	1000	712	13.6074	12.5779	0.087844	0.714581	0.498225	0.026176	0.050133	0	0	0.1189	0.575569	0.557232	0.299024	0.012866	0.37134	7.24238	0.896924	45.3036	72.4061	46.4164	70.0191	29.5392	21.8707	56.3029	64.9543	32.8407	133.637	120.299	87.0117
1.10.7	1000	713	110.049	111.607	47.9167	76.3751	75.4415	58.1925	45.1277	0.573841	10.196	41.588	75.9709	83.1049	0.185389	2.60919	0.740377	0.025923	0.934014	111.885	153.417	105.624	105.079	66.6225	51.5841	75.2333	91.4277	54.3928	211.736	201.671	166.744
1.10.7	1000	714	174.872	64.2953	0.492114	35.512	54.9423	23.3136	23.8927	0.032492	0.086435	8.74227	40.2912	107.074	0.233438	2.83691	2.83912	0.034069	1.76025	88.3095	135.91	93.5028	72.7095	46.5066	39.4659	60.0249	97.1495	54.3934	210.941	204.321	167.421
1.10.7	1000	715	9.9592	3.10816	0	0.059772	0.175522	0.070209	0.082543	0	0	0.005693	0.039848	0.101518	0.024668	0	0	0.757116	0	61.9991	81.3235	71.9943	15.1736	10.3178	9.48008	12.6176	12.8861	9.61575	14.9639	13.4004	11.7476
1.10.7	1000	716	245.817	243.613	0.066939	3.76952	56.634	9.36102	27.0382	0.013536	0.019284	0.690154	28.9114	27.0936	0.133506	0.804376	22.3866	0.081402	86.359	164.972	194.011	142.988	151.326	106.328	81.8431	112.256	128.188	80.6219	233.117	228.456	206.503
1.10.7	1000	717	17.4884	26.4195	0.075543	20.4688	42.1956	14.6237	15.8827	0.003449	0.039669	4.66368	30.9931	96.506	4.00828	6.23767	2.4129	0.007934	0.051742	61.4377	98.0752	60.5254	136.226	51.8493	39.199	137.739	133.435	70.455	207.918	186.148	141.502
1.10.7	1000	718	27.1051	29.7342	0.008353	8.18359	31.7659	3.66188	8.10242	0.004903	0.001816	0.155257	20.5026	44.8943	0.247322	0.098057	2.2377	0.387144	57.0828	70.9702	110.998	73.7901	87.4758	38.0761	30.3263	75.6401	107.935	54.71	203.203	195.047	155.49
1.10.7	1000	719	12.8254	12.2253	0.059209	0.131507	0.319787	0.011111	0.009285	0.000609	0.000457	0.002892	0.244901	0.130898	0.017504	0.000304	0.020396	94.0012	1.82664	50.6011	78.5479	51.5807	77.1531	30.8157	23.2677	65.6479	81.8224	41.0861	164.215	151.703	114.815
1.10.7	1000	720	74.0212	36.4228	0.227076	3.29714	9.03956	0.18504	0.374408	0.014424	0.010303	0.015248	8.00412	4.01216	1.45189	0.023491	0.513497	2.76715	3.18978	69.5471	107.648	72.6985	83.2275	41.1104	32.6472	71.1208	103.486	54.0787	195.124	187.457	147.815
1.10.7	1000	721	29.452	29.4603	0.192605	10.1545	39.7003	28.4404	15.3035	0.009382	0.270419	6.92218	31.0596	64.564	210.132	11.5453	10.878	1.26932	6.21358	82.4779	121.176	82.4415	102.075	50.2025	40.0999	93.112	135.214	72.2621	214.792	208.646	170.977
1.10.7	1000	722	14.5105	26.3945	0.314668	21.1029	65.2618	19.7012	26.7096	0.005214	0.078894	5.76082	31.0406	68.5377	4.91793	7.28928	2.09839	0.550442	0.167536	121.025	145.678	105.658	158.624	93.565	72.3997	154.512	164.005	99.9055	226.595	214.857	181.117
1.10.7	1000	723	10.2839	4.47595	0	0	0	0	0	0	0	0	0	0	0	0.000904	0	0.000362	0	7.88499	32.1602	19.8025	15.0658	10.7184	7.15154	14.3582	14.0197	11.67	18.9157	17.3935	12.7723
1.10.7	1000	724	13.7448	12.3779	0.014151	0.174528	1.05896	0.008648	0.027516	0.000524	0	0	0.486635	0.115828	0.001048	0.001572	0.000524	56.5066	0.334906	66.4667	95.9017	64.4075	59.9125	27.8352	22.2752	49.1347	85.0776	42.1984	199.255	190.266	152.877
1.10.7	1000	725	8.16512	4.07183	0.000265	0	0	0	0	0	0	0	0	0	0.000265	0	0.02942	0.122449	0	5.36708	19.7564	12.6337	11.3528	7.09647	6.27485	13.37	11.679	8.50967	16.8073	14.1619	12.0212
1.10.7	1000	726	14.8372	14.9443	0.24435	0.855327	1.0117	0.05004	0.08414	0.001009	0.000404	0.161219	1.21388	1.24919	0.619048	0.02381	0.38862	3.71953	1.63842	51.5504	80.0381	51.7571	86.664	36.1075	26.5811	75.4798	80.9778	41.4239	149.688	132.671	97.1039
1.10.7	1000	727	10.2316	5.40656	0.001396	0.009542	0.000233	0	0	0	0.005585	0.005353	0.000931	0.006982	0.008843	0.000698	0.114731	2.63067	0.037933	12.6742	29.108	20.0756	26.6328	15.4277	13.1017	21.9386	22.0998	14.6276	33.9546	30.1531	24.4384
1.10.7	1000	728	191.022	66.5971	0.011019	3.57094	13.3561	0.800275	2.1584	0.019284	0.030303	0.072314	11.4277	16.8884	1.31267	0.070248	5.62466	1.9332	95.4222	76.1081	116.561	78.6853	81.0634	39.9697	32.5599	65.562	91.2934	48.4676	188.946	178.928	141.161
1.10.7	1000	729	7.72698	3.96475	0.00018	0	0	0	0	0	0	0.009173	0.006295	0.001439	0	0	0.004137	0.003957	0	9.13885	14.0045	11.2284	16.0532	10.6284	10.5757	11.9694	11.0241	10.5691	13.4246	11.2745	10.4746
1.10.7	1000	730	14.3313	18.0418	0.328358	1.12693	3.89902	0.079736	0.067097	0.000269	0.001882	0.093183	4.66599	3.29716	1.85088	0.004841	0.089956	2.33643	1.24755	37.9974	70.7838	46.8873	64.5907	25.7916	21.3106	52.0619	91.8209	45.5932	175.184	170.876	130.444
1.10.7	1000	731	13.894	16.2817	0.058552	0.275703	1.64408	0.085293	0.241586	0.000922	0.001383	0.070078	1.24804	1.83725	1.27847	0.031812	0.085754	1.31351	0.338405	18.1148	54.3426	42.8926	76.5892	25.953	31.183	81.4998	88.7681	55.6418	116.605	114.716	106.784
1.10.7	1000	732	7.66006	3.92651	0	0	0	0	0	0	0	0	0.000264	0	0	0	0.000793	0.004494	0	7.26619	21.1049	12.06	15.8308	11.1232	9.40338	13.3117	13.2289	10.5305	12.6603	13.3138	11.5966
1.10.7	1000	733	227.011	217.209	0.068123	10.7462	77.4168	19.3193	37.7488	0.089964	0.021061	3.88715	37.2964	57.7267	0.99688	9.99844	18.2187	0.150286	85.37	151.444	185.833	134.652	136.826	95.0572	73.2735	105.847	134.744	81.3781	233.079	229.267	207.363
1.10.7	1000	734	169.233	118.612	1.44384	21.9768	45.6712	13.5774	18.3173	0.019357	0.02181	3.3506	31.1838	39.7031	1.55316	0.268266	1.20965	1.02454	4.46701	125.437	161.812	113.427	121.573	76.8206	58.6445	97.1409	116.339	68.135	220.716	212.65	178.679
1.10.7	1000	735	52.5796	47.1227	1.84916	37.3267	56.9252	26.7498	27.9248	0.050132	0.225594	8.72515	40.0479	86.2766	0.215919	5.01011	86.2691	0.219877	5.63281	89.0506	132.23	90.6983	81.1974	49.274	39.6983	69.5792	115.095	62.1847	214.047	208.148	169.907
1.10.7	1000	736	250.975	244.245	1.02588	10.9914	62.1402	14.9038	28.2811	0.017253	0.019244	2.71179	30.8775	32.9204	3.35877	1.6441	2.59987	2.98319	18.0203	156.113	187.336	136.82	147.988	102.687	79.1938	113.405	132.522	82.3141	232.687	227.941	204.674
1.10.7	1000	737	20.2465	24.8501	0.046581	6.05285	19.652	1.64523	2.48604	0.000627	0.001725	0.066029	16.7909	34.0789	1.2282	0.047051	1.58281	0.269762	2.07795	65.6125	105.415	70.2701	91.8479	39.046	30.7754	81.5204	112.054	57.4043	200.09	192.116	151.671
1.10.7	1000	738	8.26151	4.38398	0.000614	0	0	0	0	0	0	0	0	0	0.001842	0	0.018109	0.382136	0.011664	5.57858	16.5936	10.0236	16.2538	8.88183	7.50491	11.5798	10.67	7.62861	18.0473	15.7897	13.364
1.10.7	1000	739	17.2811	18.5199	0.649534	1.42688	21.5451	0.622242	1.32954	0.00091	0.000455	0.244712	3.95315	2.13577	1.44621	0.167387	0.101205	190.04	21.7228	102.638	134.967	95.287	108.799	61.532	48.4826	99.4389	140.568	77.7046	231.234	226.563	201.61
1.10.7	1000	740	252.92	160.087	0.100887	25.3275	55.9651	17.7711	24.5293	0.017553	0.029255	6.22748	35.1979	76.4438	0.926241	0.379965	1.63936	0.090603	1.44131	141.613	177.948	126.656	127.995	87.5059	66.9035	96.7791	107.692	66.3481	221.995	213.407	180.814
1.10.7	1000	741	15.5841	14.3731	0.037353	0.149414	2.10471	0.006755	0.018478	0.000795	0.014902	0.01371	0.429764	0.139479	0.015498	0.000199	0.005365	98.4218	1.39559	107.165	132.464	93.3717	100.548	60.8718	47.492	89.5442	118.344	66.0886	215.351	205.756	169.818
1.10.7	1000	742	10.6459	7.43627	0.001314	0.026938	0.036356	0.001533	0.001971	0.000438	0.000219	0.009636	0.12177	0.038765	0.013141	0.000219	0.292159	65.0274	0.407578	19.8165	39.5254	25.4991	37.3754	15.1555	12.0896	28.7481	33.5464	17.1231	57.242	51.9233	39.9052
1.10.7	1000	743	14.6018	14.4124	0.197241	0.512184	1.45793	0.091954	0.205057	0.001379	0	0.289195	0.898391	1.50161	1.41977	0.031724	0.77977	2.87908	1.12276	18.2189	52.006	40.8768	59.7398	24.972	28.0524	61.1646	71.7278	45.5467	85.4037	89.2998	85.8009
1.10.7	1000	744	27.5563	21.691	0.055178	1.62906	2.22959	0.014928	0.04554	0.00189	0.001512	0.097695	5.33296	4.06765	0.302343	0.010582	1.06406	0.729025	1.66326	66.657	104.071	67.5013	71.5977	31.5472	24.768	57.7538	84.2844	42.6963	176.606	167.553	126.947
1.10.7	1000	745	16.3935	30.1985	3.31329	39.182	95.0605	40.6424	47.2273	0.113805	2.35694	21.2308	48.0272	126.665	12.5276	36.9816	10.7452	0.030715	0.241836	142.934	166.025	124.448	160.176	106.036	81.8513	152.859	174.578	110.736	231.058	222.887	194.713
1.10.7	1000	746	13.7577	22.1977	0.010252	4.41691	21.664	1.53687	2.66115	0.002878	0.000719	0.106295	15.5005	25.9475	2.37878	0.091187	0.101259	0.141727	0.040108	77.5764	115.074	79.6658	141.107	62.7358	49.359	140.562	144.025	81.2658	215.706	202.709	164.594
1.10.7	1000	747	17.8013	14.7117	0.022913	0.063772	5.54046	0.025316	0.008973	0	0.000481	0.002884	0.063612	0.014901	0.033809	0.000481	0.00016	54.8989	0.123538	114.653	146.265	105.328	87.6848	61.0542	48.8124	77.1351	126.211	70.4478	235.565	232.539	215.35
1.10.7	1000	748	56.4482	52.048	0.746954	27.3288	57.009	22.178	25.99	0.026745	0.026745	4.96851	35.9033	71.542	0.988448	1.76563	3.61481	0.37316	7.1592	92.6446	136.548	95.0191	95.2747	54.1619	43.7647	85.1391	122.558	67.3489	218.783	212.909	178.019
1.10.7	1000	749	21.0927	23.8658	3.66667	10.0301	58.4561	7.31639	14.8866	0.107884	0.001037	2.70816	19.11	24.3157	4.06086	2.32434	0.708506	131.97	23.5885	83.7344	118.278	80.8281	99.8057	51.49	40.5332	90.4194	137.944	72.8323	228.746	223.791	194.379
1.10.7	1000	750	250.338	147.16	4.74304	43.5093	70.9163	40.816	40.4534	0.021413	0.313776	20.0818	49.2831	85.9209	0.452819	2.798	0.556031	0.122484	1.03854	139.065	176.149	125.502	125.175	85.5182	65.6127	92.8381	105.47	65.1189	222.787	214.571	182.797
1.10.7	1000	751	12.9747	12.3449	0.000463	0.015425	0.410304	0.004473	0.01743	0.000308	0.000308	0.005399	0.14083	0.025297	0.028536	0.000463	0.003702	116.754	2.01234	86.2584	111.561	76.2513	88.7234	46.6685	35.7436	77.5087	99.6895	53.2297	193.196	181.069	142.387
1.10.7	1000	752	10.5445	3.78218	0	0.001322	0.006344	0	0.003965	0	0	0.000529	0.003172	0.00185	0.003436	0.000529	0	0.026698	0	6.61486	30.6458	18.5887	12.9646	7.72218	6.74306	10.8269	10.7275	7.56463	17.1649	15.1042	13.1969
1.10.7	1000	753	23.5511	29.0049	0.115209	19.7205	48.7914	14.6951	17.9821	0.002471	0.039544	3.5308	30.7394	98.2289	1.89487	3.53365	2.13042	0.107605	1.48745	96.0363	137.538	96.4135	108.939	59.67	47.9686	99.7084	132.66	74.4082	218.9	212.452	177.057
1.10.7	1000	754	184.221	91.9531	3.20142	44.1639	71.0167	39.2968	38.2977	0.02332	0.703475	17.7158	48.3583	114.784	0.655464	8.67101	1.78006	0.106539	2.29927	116.779	158.818	111.236	102.666	68.3994	53.5951	82.599	110.42	64.7357	221.414	214.77	181.359
1.10.7	1000	755	12.2282	13.2702	0.00081	0.125844	0.731569	0.019714	0.08115	0.000675	0.005266	0.011477	1.335	1.69889	1.77829	0.007156	0.02633	0.00108	0.003241	14.3702	44.4672	23.7032	92.2136	14.7802	9.25938	98.4637	81.8295	34.0501	129.795	99.259	66.1871
1.10.7	1000	756	7.84924	4.05256	0.000198	0	0	0	0	0.001976	0	0	0	0	0	0	0.022328	0.019957	0	8.09702	14.1573	8.92511	14.4078	9.7127	8.51788	13.5254	10.5945	6.12152	13.542	11.9632	10.2235
1.10.7	1000	757	153.519	126.217	25.7767	66.1336	84.128	58.6691	51.2666	0.129651	6.08238	33.9698	67.6913	121.255	0.18301	12.9022	1.84975	0.018956	1.90194	121.063	162.8	114.405	108.522	72.4294	57.0786	82.5624	101.406	61.0154	219.077	210.501	176.817
1.10.7	1000	758	141.958	81.3727	0.223941	6.46801	12.3811	0.639831	0.94661	0.022034	0.030297	0.063136	12.0413	6.27627	0.487924	0.025212	0.418644	5.08708	2.22521	88.0066	125.737	85.2131	92.9483	51.5718	40.1131	74.3044	97.8057	53.8278	199.146	189.354	150.755
1.10.7	1000	759	12.9527	16.1245	0.000729	0.346827	1.21432	0.02407	0.070994	0.001337	0.001094	0.001702	2.41454	2.74727	1.37953	0.003404	0.007172	0.070265	0.001337	38.758	71.6918	43.2385	119.808	35.5586	25.3547	122.071	108.576	52.807	175.878	150.058	108.356
1.10.7	1000	760	7.42368	3.84589	0	0	0	0	0	0	0	0	0	0	0	0	0.006563	0.038405	0	8.70224	18.9336	11.8162	15.2093	6.95625	7.94458	11.6055	11.5875	8.35246	14.1021	12.6167	11.9011
1.10.7	1000	761	23.5646	24.4206	0.332657	13.9425	22.5314	5.58756	5.96755	0.005409	0.070318	4.1785	21.2394	113.343	6.43678	1.94861	5.96619	0.45977	0.620014	58.7248	94.7039	61.5321	87.5625	37.2968	30.3164	78.499	101.335	51.6477	189.961	175.628	133.97
1.10.7	1000	762	12.1288	10.7027	0.000642	0.024171	0.26246	0.022246	0.035508	0.013476	0.000642	0.016257	0.131979	0.028663	0.000428	0.034866	0.000214	143.628	4.05925	46.2717	73.0274	46.9425	63.259	21.8086	16.3012	51.6214	68.2575	32.3273	155.934	142.926	107.732
1.10.7	1000	763	67.0741	79.0944	6.49787	46.3506	83.9159	42.5729	42.9435	0.151488	1.62386	19.442	50.0899	93.5322	1.86733	14.6903	5.33698	0.17881	3.26321	123.542	160.775	117.037	130.048	84.7668	67.0653	114.855	139.967	84.4369	227.902	220.611	190.673
1.10.7	1000	764	12.8547	11.6135	0.672325	0.911962	0.780103	0.035136	0.143308	0.002764	0	0.120016	0.561784	1.6285	0.60837	0.016186	0.519937	2.97434	2.1062	5.20095	22.728	12.2732	26.0833	3.57758	2.77221	16.4066	19.5669	6.45559	49.3012	41.377	30.5985
1.10.7	1000	765	32.5316	33.1005	0.983508	34.1067	42.1696	19.4399	17.6044	0.005783	0.04819	5.12529	36.3211	87.1193	1.10559	0.701435	7.20754	0.006425	1.27907	63.4954	108.295	71.6406	66.5211	31.0606	26.6582	53.3444	89.3431	45.9268	197.743	189.716	149.454
1.10.7	1000	766	74.8944	56.996	0.243673	19.3713	25.4877	9.59255	8.14859	0.025307	0.026392	2.1551	27.4367	55.8192	1.40419	0.609544	0.723066	0.052784	0.119667	68.1005	108.289	71.4038	124.702	51.4711	40.0571	122.48	122.29	65.5882	203.193	186.645	147.404
1.10.7	1000	767	8.22503	4.16227	0.000185	0	0	0	0	0	0	0	0	0	0.000185	0	0.019937	0.050212	0.002031	8.09858	18.7081	12.976	17.06	10.6116	8.93428	13.8534	12.2922	9.28521	17.0559	14.6376	9.82536
1.10.7	1000	768	141.126	122.016	7.78052	48.803	68.4638	41.0694	38.4171	0.020193	0.885523	21.0325	52.457	90.3102	0.062442	2.9155	1.43352	0.015222	1.21823	126.041	165.676	116.484	115.834	76.1839	59.2841	88.3666	104.128	62.763	220.093	211.605	178.181
1.10.7	1000	769	11.9415	18.1737	0.001773	1.78907	9.039	0.618021	0.956278	0	0.000886	0.039586	8.27622	18.0892	6.04845	0.068242	0.066765	0.000591	0.002659	77.1716	107.573	72.0213	174.431	80.1448	62.0996	181.469	165.292	97.9078	217.663	197.71	158.993
1.10.7	1000	770	23.3519	31.1352	0.04902	1.88844	39.7809	6.29581	16.1092	0.004733	0.003381	0.190331	21.69	31.9669	0.004057	1.46755	213.411	1.01319	225.413	67.5794	104.318	70.0132	72.5453	37.1241	30.6961	57.9344	109.395	56.0801	214.072	208.328	172.705
1.10.7	1000	771	20.7121	24.8728	0.130952	1.07738	20.5796	1.03125	5.97173	0.002232	0.002976	0.052083	11.3661	11.4152	0.002976	0.689732	134.076	2.85268	133.985	54.9576	85.6882	55.0327	75.1019	30.7299	23.8996	57.192	88.7589	42.974	182.76	171.448	132.786
1.10.7	1000	772	11.7014	9.7072	0.182526	0.144286	0.166296	0.013784	0.004224	0.000445	0.000445	0.022899	0.314584	0.175189	0.082036	0.000445	0.063584	63.5838	1.39284	28.5598	52.7377	33.3337	51.6696	15.7403	11.7383	40.972	50.9117	23.8975	111.789	100.894	74.4102
1.10.7	1000	773	0.08	0.034286	0	0	0	0	0	0	0	0	0	0	0	0	0	0.777143	0	15.1029	37.2114	27.3771	53.2743	36.8743	32.0457	0.051429	0.08	0.091429	23.0914	23.0343	22.6057
1.10.7	1000	774	164.19	122.506	0.121412	3.92767	9.30224	0.515212	0.885476	0.022388	0.022675	0.091848	11.3683	4.98967	0.572044	0.021527	0.336682	14.4971	6.03387	107.976	142.887	96.2655	116.323	66.1019	49.2268	90.1854	98.3157	56.1693	205.714	192.433	153.624
1.10.7	1000	775	13.5462	15.1566	0.830913	0.738849	3.1818	0.103734	0.21499	0.000778	0.000778	0.012967	2.04279	0.434647	0.376297	0.017635	0.010114	47.1234	2.48055	41.8081	74.1302	48.8439	73.9544	27.5306	21.8211	61.5744	91.6502	45.2331	179.857	171.419	132.215
1.10.7	1000	776	18.2038	34.7156	38.8815	74.1943	60.0474	18.5213	15.3175	0.137441	0.199052	87.3128	36.2796	222.118	5.58768	74.9526	15.8531	66.9573	22.9479	122.498	158.227	118.806	128.057	102.782	85.0806	111.777	151.853	99.673	230.104	222.763	197.526
1.10.7	1000	777	11.9818	10.1574	0.311953	0.49344	0.389213	0.016035	0.05758	0	0.000729	0.146501	0.221574	0.413265	0.720845	0.110787	0.088192	0.655977	0.188047	1.69971	19.1224	9.89432	11.7318	1.83236	1.8914	9.43513	16.7653	5.63411	21.5641	23.7777	20.3673
1.10.7	1000	778	121.536	124.598	10.5219	47.28	52.2165	31.8797	27.7396	0.012809	0.13035	18.2309	50.4332	59.3433	0.019439	0.072333	0.163502	0.00859	0.159735	117.558	159.559	109.21	112.269	69.4445	53.0387	78.4956	82.9958	50.2048	207.582	195.489	159.718
1.10.7	1000	779	187.338	190.33	25.1057	61.0292	88.6479	51.2461	49.049	0.302812	2.94286	31.4857	65.719	88.5636	0.316085	6.4261	1.23217	0.016873	0.446794	151.537	186.774	135.68	140.636	97.1699	74.6427	104.572	109.427	69.3618	226.158	217.824	188.144
1.10.7	1000	780	21.7757	22.9474	0.193082	1.65786	17.139	0.319287	1.2283	0.002096	0.002516	0.120545	7.04403	6.12537	1.00755	0.031237	0.37631	2.32117	2.01803	101.617	133.382	92.6243	105.58	62.8522	47.8386	95.7864	127.026	70.6654	209.002	200.951	161.716
1.10.7	1000	781	16.3665	15.0248	0.046437	0.199156	9.36926	0.201639	0.504594	0	0	0.087162	0.684132	0.169109	0.097591	0.059349	0.004718	231.633	22.7884	144.425	170.489	127.969	121.785	82.5855	66.3149	107.877	144.967	86.2759	236.699	233.871	220.492
1.10.7	1000	782	39.7701	37.9172	0.098184	19.4948	42.7702	12.6855	16.5503	0.009164	0.008182	0.80936	27.6217	54.7401	0.654394	0.157748	5.03322	0.142857	3.06317	81.8984	126.402	86.7941	81.5034	44.6397	36.3512	71.378	115.506	61.6899	211.267	206.463	169.271
1.10.7	1000	783	246.4	86.4791	0.07947	26.1207	43.2123	13.2732	15.7984	0.027732	0.049876	3.32368	31.9801	74.6149	0.40625	0.267591	2.62334	0.026904	1.89508	97.9201	141.658	97.1039	84.9416	53.97	43.7765	67.3235	96.6449	54.6469	207.102	199.121	161.878
1.10.7	1000	784	10.2677	3.51365	0	0	0	0	0	0	0	0	0	0	0	0	0	0	0	6.74512	31.2785	18.1168	12.8929	12.8864	8.68433	14.2023	12.139	8.93347	15.6864	15.6536	12.2205
1.10.7	1000	785	253.209	183.796	0.114949	13.8992	27.8019	4.1688	7.34875	0.018384	0.019127	0.917363	24.2986	37.6531	0.303993	0.028227	1.10492	0.097493	2.39851	127.303	165.245	114.238	121.277	79.2178	60.2514	90.7842	92.8576	56.4522	206.392	192.913	157.204
1.10.7	1000	786	16.2084	12.6509	0.002709	0.119031	1.41957	0.008127	0.003048	0.000339	0.000339	0.001185	0.070775	0.001524	0.003048	0.000339	0.006434	99.939	0.060955	123.908	150.697	109.066	89.9705	61.2665	48.6993	75.8759	113.346	63.8933	234.087	229.223	207.758
1.10.7	1000	787	10.2227	4.61544	0	0	0	0	0	0	0	0	0	0	0.003835	0.000511	0.006392	0.011506	0	6.62235	27.5561	16.1726	16.4076	9.83534	7.04526	15.8762	13.4211	10.2708	20.7875	18.2774	15.2986
1.10.7	1000	788	81.2545	23.3366	0.074612	0.613695	0.273579	0.083979	0.100452	0.020026	0.014212	0.024225	0.632429	0.565891	0.259367	0.010982	0.32978	2.07364	0.823643	38.3052	69.688	45.6486	55.0439	24.9012	19.9952	40.3873	46.074	25.5775	96.6379	85.6986	64.5885
1.10.7	1000	789	9.86868	4.63694	0	0	0	0	0	0	0	0	0	0	0	0.001847	0	0.000504	0	10.0903	31.3785	20.1579	15.3086	10.9464	13.6096	14.2999	13.2321	11.5075	19.7139	17.4989	15.6794
1.10.7	1000	790	11.649	10.1735	0.08537	0.292412	0.781831	0.0332	0.123677	0	0.003466	0.077344	0.736045	1.30007	1.15961	0.031923	0.056366	0.39274	0.17147	15.784	38.0007	18.1622	66.8546	11.5201	4.99945	64.0934	48.9113	15.2483	86.3017	55.9427	31.6069
1.10.7	1000	791	164.572	188.792	0.700608	23.0956	51.7374	18.3274	24.3923	0.018237	0.017899	6.16008	36.3728	47.9232	0.524316	0.211246	1.44141	0.080547	5.99375	155.74	186.649	134.259	155.743	103.953	78.3475	121.385	118.283	73.9156	226.054	216.377	185.549
1.10.7	1000	792	128.301	145.441	21.8596	58.5919	75.1031	42.6241	39.5311	0.034415	1.56867	27.8741	60.9282	75.2786	0.039167	1.72337	0.498197	0.017371	0.157653	136.632	174.49	124.067	126.688	85.0061	65.6919	93.7652	101.534	63.2006	221.065	211.72	179.187
1.10.7	1000	793	12.2566	13.8401	0.001504	0.238764	0.895739	0.030576	0.096742	0.000668	0.000835	0.030911	1.9888	2.82556	1.79449	0.009858	0.023559	0.001504	0.002673	16.3612	46.3848	24.4274	107.005	19.131	11.9926	115.088	92.1054	39.3018	144.75	109.356	72.9295
1.10.7	1000	794	12.0644	15.393	0.000482	0.396577	1.5364	0.08703	0.078351	0.000723	0.00217	0.02001	2.63139	4.73771	3.63886	0.015188	0.021938	0.000964	0.000241	54.4725	83.8373	51.1854	166.313	64.0501	46.953	175.602	149.64	81.7994	205.736	176.432	132.637
1.10.7	1000	795	30.8714	46.5394	39.7031	80.5	104.749	72.8753	60.7892	3.37374	13.527	39.8351	74.9934	137.635	1.20348	36.8378	30.373	0.043243	3.39807	89.8201	136.134	95.2525	80.007	50.7622	42.5452	68.4031	117.828	65.9795	222.993	217.706	184.488
1.10.7	1000	796	9.14332	5.71335	0.0057	0.000814	0.017915	0	0	0	0	0.115635	0.008958	0.026873	0.008143	0	0.351792	3.00896	0.241857	2.93323	16.7264	15.5285	14.9332	8.17671	10.5879	14.9218	22.7581	17.237	18.1661	21.9853	25.3062
1.10.7	1000	797	98.9952	108.271	33.0072	64.1678	80.1026	49.294	43.2309	0.170479	3.30099	31.6224	63.2413	71.5497	0.22851	5.38358	2.32603	0.076812	2.2326	117.562	156.867	110.443	114.031	74.1782	58.0084	92.9547	116.985	69.1529	222.622	214.937	182.427
1.10.7	1000	798	36.8578	31.3218	0.060871	22.576	40.5672	10.6682	13.346	0.005563	0.002861	1.52781	29.4652	89.0714	0.646376	0.508106	6.01272	0.027813	2.31802	78.2142	119.976	80.0467	83.136	43.3428	34.7421	72.893	109.171	57.6955	205.92	198.428	158.418
1.10.7	1000	799	13.8396	9.73827	0.203565	0.500938	0.630394	0.022514	0.023452	0.001876	0.000938	0.158537	0.38743	0.410882	0.571295	0.000938	0.508443	65.8921	0.77955	93.7448	104.416	70.1445	94.803	54.878	40.8743	78.454	77.4822	44.3321	132.024	106.156	78.0366
1.10.7	1000	800	22.3842	35.627	5.26814	52.6504	98.0082	58.0674	52.1334	0.222671	5.88938	26.4876	58.4502	140.544	0.720912	36.436	12.9139	0.003388	0.461107	98.4702	145.48	104.174	86.9303	56.0807	47.4567	72.7062	123.732	70.6883	227.319	223.372	193.244
1.10.7	1000	801	13.4445	8.81713	0.000938	0.028759	0.232885	0.000313	0.000313	0.000625	0	0	0.003751	0.000313	0	0	0	174.112	1.74461	129.461	153.53	110.963	87.6974	57.5524	45.6049	65.2307	88.4583	50.8068	230.518	223.142	198.518
1.10.7	1000	802	15.5207	26.6696	0.146099	8.62294	34.8635	6.35344	9.51943	0.001865	0.001865	1.91669	24.2247	66.742	4.08579	4.7451	0.810382	0.313957	0.189929	123.047	155.954	114.433	143.762	86.645	67.9587	137.242	159.999	96.3283	225.485	218.703	187.386
1.10.7	1000	803	8.25108	4.40086	0.000446	0	0	0	0	0.000149	0	0.001934	0	0	0.016213	0	0.029302	0.314889	0.008032	4.57965	14.2795	8.98379	13.4651	7.58173	4.91908	9.36978	7.30552	4.30849	14.452	11.5813	9.20051
1.10.7	1000	804	252.422	181.462	0.089898	16.9791	38.6989	8.46152	14.4271	0.019543	0.023301	2.26533	28.2105	55.6866	1.27736	0.033674	1.93506	0.095761	1.94062	140.605	175.505	123.255	135.309	89.7971	67.4412	104.319	107.483	65.5356	217.731	206.497	171.917
1.10.7	1000	805	10.1583	3.23307	0	0	0	0	0	0	0	0	0	0.000831	0	0	0	0.049024	0	17.8841	42.2052	31.1437	14.7578	9.88658	9.20897	12.4038	11.9705	9.50852	15.4699	13.0274	11.5064
1.10.7	1000	806	13.1703	16.3826	0.001882	0.426501	1.75814	0.071523	0.180124	0.001506	0.004329	0.00734	3.10314	4.12836	1.79522	0.00847	0.025974	0.014681	0.006776	21.4683	55.0247	31.4909	103.888	20.9912	15.0203	106.314	93.4924	42.202	156.446	129.157	91.993
1.10.7	1000	807	25.1849	39.2759	0.107275	1.95676	91.1715	20.0644	43.141	0.122192	0.002849	1.86959	37.091	71.9509	0.034361	29.6963	79.8272	0.0647	109.859	85.82	128.562	88.5722	78.0932	50.8684	42.8872	73.0867	147.611	79.5357	233.233	231.343	209.278
1.10.7	1000	808	24.6729	31.2874	0.537398	3.40503	49.4753	5.04556	14.9112	0.007253	0.001133	0.262466	19.7854	20.303	2.44084	0.844742	1.03015	2.04034	10.1571	84.2502	124.817	87.1825	93.3373	54.1029	43.6865	90.6802	145.752	79.092	225.052	221.908	191.338
1.10.7	1000	809	14.5008	16.2546	0.106887	0.94827	3.45684	0.191648	0.392957	0.000935	0.009349	0.094422	4.05983	5.70676	1.23496	0.077906	0.09598	0.16703	0.109691	49.1321	71.0449	38.1854	112.026	31.2674	18.2281	108.057	91.5276	38.6703	168.491	130.375	80.8473
1.10.7	1000	810	24.8246	27.7196	0.170097	3.12085	25.6633	0.744799	2.61011	0.002656	0.007525	0.045706	13.0791	9.91656	0.601483	0.020584	0.46691	0.805777	1.95385	73.0281	111.353	75.5225	84.3016	40.615	32.1598	74.377	115.664	59.4624	204.957	199.251	160.351
1.10.7	1000	811	117.802	72.0043	0.035217	7.33824	50.7043	10.8022	21.3754	0.025929	0.018576	0.933437	26.4094	41.9249	1.48142	1.81502	25.9118	0.516641	142.667	81.5499	123.007	83.5983	79.9369	45.231	36.9536	67.3812	120.267	63.7233	219.603	215.327	182.396
1.10.7	1000	812	19.5537	21.3592	0.009887	0.693216	19.5353	0.302939	1.81598	0.003021	0.003296	0.397968	6.26888	3.6067	1.75529	0.072233	0.795111	72.5147	75.1428	80.9319	112.355	77.7778	93.9151	50.1346	39.7608	86.8083	133.384	70.8275	218.694	213.189	177.277
1.10.7	1000	813	14.5181	13.9472	0.246802	0.381631	1.19585	0.023275	0.049906	0.001048	0	0.009855	0.730342	0.16796	0.050535	0.0065	0.014468	34.7142	1.16125	58.4036	86.926	57.6257	70.0327	31.1038	24.0453	58.2944	84.5871	42.5175	170.434	161.133	122.023
1.10.7	1000	814	12.3026	15.9469	0.000231	0.710132	2.9393	0.198477	0.351489	0.002539	0.000692	0.047081	3.53843	6.70852	92.7577	0.070621	0.120009	0.001154	0.002077	40.3226	72.2677	43.8297	135.352	43.5774	32.0129	143.516	127.888	65.8348	180.04	152.23	110.52
1.10.7	1000	815	13.6266	14.4575	0.023741	0.605059	0.611493	0.027291	0.024406	0	0	0.10051	1.31551	0.540493	0.330153	0.000444	0.249168	4.06789	1.10517	43.4881	72.8312	47.0759	57.9552	24.3594	19.1056	43.9942	67.5514	33.1562	150.438	141.988	104.044
1.10.7	1000	816	21.5915	37.6207	15.5731	63.8146	125.038	70.4114	68.6713	4.66144	12.1694	37.9835	66.7995	173.759	13.3652	62.7394	21.9686	0.041489	2.64202	131.322	163.377	119.804	134.591	90.896	71.6189	124.507	160.076	99.358	232.001	225.933	198.098
1.10.7	1000	817	15.2652	14.2691	0.862652	1.65295	1.89601	0.129549	0.19844	0.0013	0	0.27383	2.34922	2.73744	1.82842	0.04766	0.30026	3.17071	1.63821	47.9437	66.399	35.9896	85.8497	26.3284	15.555	72.9714	66.0264	26.9419	134.246	100.315	60.6443
1.10.7	1000	818	12.6341	13.1851	0.002583	0.142555	0.637623	0.034054	0.08807	0.002349	0.000235	0.01644	0.666275	1.60733	1.11696	0.018788	0.017849	0.225693	0.043682	9.57421	43.1343	26.5679	57.9185	10.9025	10.8126	65.484	68.7346	34.1837	83.4016	77.1557	59.9025
1.10.7	1000	819	16.9709	33.7345	93.6314	148.233	99.2148	97.5953	41.1921	4.03616	11.0664	116.857	78.3654	250.848	151.341	119.755	36.9579	0.054506	12.6838	58.6654	94.4981	65.5235	68.1144	44.7868	37.6746	50.4463	97.1074	53.7075	217.774	211.349	175.981
1.10.7	1000	820	14.1252	12.8336	0.001342	0.292039	1.39445	0.095259	0.299195	0	0.013417	0.098837	1.06843	2.33989	0.964669	0.293828	0.168157	2.42844	0.203041	11.9584	45.6726	31.3801	36.4387	14.9432	16.3985	48.1409	60.9951	36.7719	31.4718	37.1011	33.8157
1.10.7	1000	821	13.906	15.7035	0.010768	0.452105	0.526037	0.024108	0.017036	0.000804	0	0.055448	1.2046	0.580521	0.43748	0.001929	0.059788	2.84008	1.02845	44.8367	77.9105	51.9847	69.4793	30.0231	24.2364	58.1348	83.9727	43.3574	159.514	153.507	115.808
1.10.7	1000	822	25.0457	38.2946	0.014621	0.686052	86.0335	15.8227	39.2919	0.070314	0.002464	0.603417	32.8326	57.0256	0.684902	23.5993	17.6746	0.798094	54.6838	90.2937	133.242	93.0049	84.3749	56.9177	47.3227	81.079	153.218	84.032	233.415	231.582	209.848
1.10.7	1000	823	14.5281	16.2472	0.022472	0.404983	1.83244	0.079629	0.24426	0.00342	0.000977	0.011724	1.78163	3.51441	1.9233	0.160723	0.03615	0.348803	0.095261	30.683	72.1065	50.873	81.0953	31.4006	32.1402	102.524	106.633	64.1891	94.2311	96.8999	81.8422
1.10.7	1000	824	0	0.001976	0	0	0	0	0	0	0	0	0	0.000165	0.000165	0	0	0.009881	0	4.84272	12.3067	8.50576	13.1598	9.60096	8.65184	0.037714	0.042819	0.031621	13.7696	12.9557	11.7622
1.10.7	1000	825	9.37712	4.31373	0	0	0	0	0	0	0	0	0	0	0.005972	0.001148	0.020671	0.040423	0	8.40514	27.1814	17.2209	17.2979	12.6644	11.1716	14.4256	13.8282	10.7283	20.8316	18.5161	12.6587
1.10.7	1000	826	9.12859	4.12798	0	0	0	0	0	0	0	0	0	0	0	0.001213	0.002628	0.015973	0	7.96583	25.6886	17.3122	15.3168	11.2673	8.81844	13.9818	14.0756	9.79074	20.4076	14.2202	13.8381
1.10.7	1000	827	253.196	217.277	0.046938	4.97952	15.4728	0.825901	2.67549	0.014082	0.021976	0.223597	15.8172	13.86	0.243013	0.010241	0.356305	0.168551	4.37593	138.211	173.097	120.647	136.37	90.8526	68.2151	99.9503	91.7662	58.5005	208.493	193.057	157.902
1.10.7	1000	828	140.141	59.2249	0.604864	35.323	61.2918	25.3765	27.733	0.029757	0.108441	9.6226	40.7708	113.697	1.09728	5.12761	2.51617	0.02432	4.33362	97.9064	142.844	98.816	85.0552	53.8844	43.8072	72.7365	109.678	61.5087	217.312	211.008	175.082
1.10.7	1000	829	7.90486	3.99207	0	0	0	0	0	0	0	0	0.000352	0	0	0	0.005638	0.024489	0	5.35183	16.5735	12.7555	13.7835	9.55373	10.0428	15.0493	12.4991	9.97463	16.9491	11.6445	12.4908
1.10.7	1000	830	139.41	84.3287	0.051309	4.28839	24.3974	4.1419	7.09696	0.030786	0.02937	0.438783	16.6557	16.3277	1.80963	0.268224	9.34112	9.76575	227.391	87.4749	122.11	82.7714	92.8163	50.7951	40.1037	76.098	107.656	58.5057	207.425	199.059	161.308
1.10.7	1000	831	8.31598	4.58691	0.000121	0.000483	0.000725	0	0	0	0	0.025003	0.00157	0.000483	0.01377	0	0.105448	1.27636	0.017393	2.77268	12.1128	8.61384	10.1224	4.14905	3.89866	6.2214	5.89455	3.94456	11.739	9.57483	8.90615
1.10.7	1000	832	15.6719	17.8217	0.14366	0.908026	1.89791	0.055056	0.072392	0.000963	0.000161	0.076083	3.31364	2.52488	0.838523	0.022472	0.290209	1.7488	1.54334	50.9085	83.1607	53.8369	89.7244	34.2252	25.63	77.5228	89.66	44.7066	171.963	157.302	117.67
1.10.7	1000	833	18.0373	15.5112	0.002129	0.085779	7.38145	0.008821	0.016426	0	0	0.000913	0.398631	0.017795	0.225856	0.00076	0.000304	84.9386	0.165475	98.8324	133.05	93.7142	84.8795	52.8948	42.1935	75.5786	126.275	68.0438	234.004	230.501	210.085
1.10.7	1000	834	18.4454	28.0677	0.124756	19.0133	49.9808	12.8663	18.6613	0.001173	0.08291	5.4955	30.0047	103.644	3.63121	9.4517	1.93273	0.265937	0.297614	107.296	138.9	99.1834	137.181	77.7298	61.1752	131.059	148.623	87.6688	214.354	200.158	164.768
1.10.7	1000	835	249.073	122.724	3.37723	35.8485	37.9633	23.2262	18.8862	0.017625	0.078091	10.7119	40.9679	46.5412	0.0612	0.04186	0.052632	0.016401	0.220318	106.273	149.073	99.6597	100.057	61.6401	47.0945	67.6565	70.4561	42.1692	192.334	178.311	142.762
1.10.7	1000	836	11.6208	4.82002	0	0.003033	0	0	0	0	0	0.003539	0	0.008089	0.033873	0	0.001011	0.16633	0	13.7892	38.1855	24.3342	20.7705	13.8923	12.1122	17.9287	19.3428	13.2806	23.8023	21.6689	17.6254
1.10.7	1000	837	0.002046	1.77877	0	0	0	0	0	0	0.005371	0.015601	0	0	0.006138	0	0	0.006394	0	7.10563	14.6161	10.9473	15.2133	10.5243	9.34476	14.1251	13.1353	10.5678	17.3463	15.1192	13.5223
1.10.7	1000	838	16.0925	28.6872	32.6652	70.8767	55.467	49.7533	33.4317	0.537445	5.60352	25.4493	60.793	64.6256	0	1.08811	252.3	0.013216	34.7841	66.0749	107.062	71.4361	75.7885	38.3304	29.4097	56.5991	96.4846	49.6167	202.189	194.907	154.996
1.10.7	1000	839	205.096	184.587	0.066746	4.6329	72.1422	16.5828	35.76	0.081446	0.041716	2.18951	34.0735	50.406	0.022646	10.0433	155.764	0.101708	194.752	142.033	177.053	126.791	127.177	86.3278	67.1947	97.2571	131.121	77.7628	232.551	228.884	206.182
1.10.7	1000	840	9.48209	4.31908	0	0	0	0	0	0	0	0	0.000158	0	0	0.001105	0	0.001262	0	8.74925	28.9751	17.9501	13.6951	13.6064	9.99779	13.9738	13.0353	9.69134	18.9714	17.3893	16.226
1.10.7	1000	841	253.512	167.47	0.356065	26.8896	39.4984	14.7595	16.1104	0.013274	0.039823	5.26627	34.6601	54.2301	0.219157	0.07392	0.307913	0.020302	0.306351	118.494	159.739	109.143	110.572	71.9214	55.2504	78.1947	79.1648	48.6819	200.383	186.117	150.945
1.10.7	1000	842	110.986	98.1755	1.64748	44.6633	153.646	71.1993	88.8655	16.6906	5.78777	16.7201	49.6022	72.2331	1.33525	48.2518	4.43309	0.381295	11.3396	127.594	173.686	125.609	115.177	85.5683	70.8403	100.96	146.451	89.1647	228.742	224.086	196.43
1.10.7	1000	843	13.3385	13.3172	0.445371	0.29261	1.54609	0.03973	0.056416	0.012515	0.000993	0.02642	0.563766	0.096742	0.15296	0.074891	0.026222	213.595	21.5908	67.7531	98.5848	65.3671	86.8222	38.6182	29.3196	74.6079	99.7513	51.1091	200.602	189.235	151.443
1.10.7	1000	844	62.2267	46.5334	0.107082	13.1939	35.0754	6.70103	11.2196	0.015134	0.011993	0.501142	24.0465	45.9109	0.5257	0.076242	2.7076	0.143347	50.2881	76.307	119.78	80.7624	83.8866	39.3178	31.9552	72.0383	105.768	54.8387	204.693	197.464	159.311
1.10.7	1000	845	87.7325	33.3628	0.070989	2.01397	0.990218	0.132476	0.14701	0.023197	0.019843	0.044718	2.74399	2.66154	0.818055	0.025154	0.323644	3.48798	2.52292	50.955	86.8832	56.4391	65.858	27.2037	21.7281	50.7292	62.6302	32.5579	140.125	127.394	94.6059
1.10.7	1000	846	149.112	98.1674	0.471918	8.89292	25.6281	3.1105	6.0952	0.021233	0.020091	0.281279	18.3384	17.737	0.915297	0.035388	0.676712	1.96872	3.57877	116.54	152.469	105.461	116.912	70.9379	53.9443	95.6422	114.789	65.9358	214.713	205.73	169.052
1.10.7	1000	847	22.5236	22.6115	1.1125	3.15914	6.62211	0.432212	0.823077	0.001923	0.002404	0.115385	6.62115	7.62115	1.38173	0.097115	1.32404	2.82115	12.9308	22.3433	59.4096	37.2423	42.5337	7.16731	7.39423	27.3442	63.6298	27.9803	153.073	149.163	113.618
1.10.7	1000	848	24.6558	27.6817	0.04618	0.879281	22.4404	0.41872	3.03688	0.003874	0.002634	0.029909	12.2307	7.67782	1.02015	0.120099	2.55525	2.94468	50.225	72.2111	110.138	75.6679	86.5481	43.5334	35.3025	78.384	123.787	65.006	211.688	207.361	171.151
1.10.7	1000	849	251.259	210.491	0.657461	18.2672	37.8304	10.783	16.1375	0.017351	0.01952	4.37175	29.5561	40.9973	0.448814	0.008386	1.22614	0.094563	2.34341	152.086	183.98	130.109	151.429	101.539	75.4685	114.513	105.13	66.2647	220.784	207.98	174.164
1.10.7	1000	850	99.6676	101.182	36.9602	75.3329	95.8057	66.0463	56.8435	1.64537	11.2201	39.6886	74.5101	133.324	0.204604	25.5572	6.46017	0.023539	2.33135	113.484	157.448	111.346	98.8727	66.5313	53.4948	78.8179	107.807	63.7271	222.234	215.158	182.191
1.10.7	1000	851	138.544	70.0235	0.189401	7.00087	25.3102	10.6777	6.37098	0.028671	0.078193	1.72806	21.7654	33.1955	98.987	1.38923	3.4709	0.456125	5.20417	80.4874	118.472	79.8228	92.5056	46.6221	37.1321	79.0096	112.707	59.3267	202.381	194.409	154.873
1.10.7	1000	852	11.3897	10.3333	0.144734	0.294978	0.74253	0.028184	0.120364	0.000212	0	0.0943	0.636999	1.06378	1.28248	0.017377	0.077771	0.406442	0.384403	7.94067	29.0776	13.8347	45.6707	6.25238	3.17694	40.971	34.9972	10.4071	66.3916	46.309	28.7222
1.10.7	1000	853	12.6929	17.5184	0.000894	0.587867	2.06469	0.06931	0.064242	0.001789	0.003279	0.001192	4.23386	5.28842	2.52258	0.004173	0.012371	0.001341	0.001192	51.3807	87.6429	56.7289	143.198	51.0537	39.271	148.271	135.056	72.6785	199.337	177.898	136.491
1.10.7	1000	854	253.724	151.447	0.003547	20.7601	46.6553	8.69724	14.7957	0.01725	0.042399	2.22183	30.639	68.4886	0.221506	0.052233	0.400613	0.023215	0.251975	130.083	169.959	119.077	114.029	78.1027	59.8691	82.9246	90.6989	55.9146	213.075	202.005	166.754
1.10.7	1000	855	170.308	156.473	2.60268	23.2237	45.6761	15.5653	18.5886	0.026112	0.025406	5.56034	33.7029	33.8299	2.74312	0.661256	1.80593	1.7156	2.63585	87.0176	121.882	80.5596	96.2689	46.2025	36.1214	78.6394	103.304	54.4213	206.207	194.392	156.22
1.10.7	1000	856	145.945	66.7972	0.901489	18.0167	19.6407	3.32454	3.04886	0.021165	0.027959	0.442122	20.9971	25.8657	0.525216	0.046773	2.11732	0.329762	1.36164	69.4142	112.605	75.445	68.8626	35.3269	29.7058	52.2464	80.0706	42.7766	186.002	176.958	138.577
1.10.7	1000	857	50.1144	42.1345	3.62903	47.6854	71.3446	40.0083	35.9524	0.010295	0.945485	17.4572	50.8435	137.248	0.158481	14.4181	4.57857	0.00827	0.994768	83.375	131.136	90.1559	71.9603	43.6911	37.4928	60.3406	101.9	56.1792	215.498	209.465	173.198
1.10.7	1000	858	28.1358	29.8424	0.507329	6.29764	34.052	14.7942	10.4355	0.006282	0.029315	2.43464	23.8427	41.6129	117.498	2.91804	4.2758	2.52199	6.83099	88.5983	125.802	87.0422	105.556	57.4272	45.376	99.3631	139.788	76.6713	217.778	211.92	175.313
1.10.7	1000	859	20.8374	34.7623	6.3537	49.5405	90.9633	47.0369	44.8495	0.122868	2.27294	22.5422	52.1602	116.813	3.66638	27.336	11.2855	0.025265	0.217232	91.6541	125.825	84.5353	129.475	65.3161	51.0864	122.142	138.439	77.7027	223.814	210.948	172.859
1.10.7	1000	860	142.364	110.982	12.7022	46.1349	36.4094	26.878	19.5544	0.018742	0.053311	16.3478	47.1791	44.8646	0.164515	0.072053	0.237818	0.018742	0.218659	96.4831	138.024	91.4198	95.6264	53.6839	41.3673	64.8726	70.2449	40.4207	188.168	173.873	137.868
1.10.7	1000	861	10.2261	3.2011	0	0	0	0	0	0	0	0	0.001148	0	0	0	0	0.006887	0	7.51079	31.6104	21.1529	14.7158	8.56933	10.0636	12.0902	11.5354	9.87098	14.5964	14.9194	9.43434
1.10.7	1000	862	11.6971	9.63341	0	0.015188	0.136391	0.009827	0.000596	0	0	0.00268	0.101251	0.008934	0	0	0.002382	161.647	3.30584	118.887	137.124	96.8898	96.8952	60.1158	46.5039	79.9342	95.7883	55.0938	203.545	187.362	151.288
1.10.7	1000	863	24.7665	31.9937	7.4144	27.2794	58.0591	20.1958	22.9492	0.01143	0.019212	4.27699	31.8193	37.607	2.12038	1.85165	3.22033	2.32296	2.72544	77.421	117.74	81.2836	89.9343	47.8174	38.7571	79.2415	121.464	64.9424	215.953	209.507	173.275
1.10.7	1000	864	8.19376	4.79622	0.07842	0.082427	0.008872	0	0.001145	0	0	0.116199	0.005438	0.029765	0.076417	0	0.09731	1.20321	0.038924	1.9814	10.2204	7.11706	7.44705	2.51546	3.03921	8.21294	11.3383	7.11906	11.9064	11.3864	11.8506
1.10.7	1000	865	10.912	4.88532	0	0	0	0	0	0	0	0	0.00022	0	0.004402	0.00044	0	0.009465	0	8.91371	32.7603	20.9593	17.8545	8.46841	8.32534	14.8926	13.9031	10.0993	21.1503	16.3841	15.7816
1.10.7	1000	866	192.614	83.7195	6.76247	54.3606	86.1014	47.0673	45.0404	0.103018	2.02887	25.187	57.3333	162.031	1.10761	26.9777	6.25394	0.034777	1.29068	106.064	153.268	108.128	84.6325	59.3025	49.4131	70.2785	108.323	62.8648	222.58	216.818	183.984
1.10.7	1000	867	15.8582	15.6705	0.303687	1.27518	2.44375	0.249905	0.390726	0.00133	0.00019	0.205435	2.1813	2.92037	1.13911	0.069365	0.426834	3.00418	2.46256	31.8854	58.6034	35.3214	66.7702	18.7957	12.8945	50.5614	55.0173	23.9479	127.05	109.059	76.8546
1.10.7	1000	868	190.924	132.615	0.57924	17.8094	36.966	9.58727	12.9635	0.024405	0.021625	1.74792	27.4479	30.7158	1.12635	0.066111	1.73679	1.09917	3.96355	107.204	146.795	101.277	105.818	62.6559	48.692	83.8557	106.833	60.6423	213.521	204.834	169.074
1.10.7	1000	869	32.2271	35.0374	2.08577	31.9693	35.9023	13.6054	13.531	0.007685	0.014874	2.5471	31.0865	44.9249	0.615518	0.346554	7.10238	0.356966	1.95811	55.4593	98.7568	65.318	66.8446	26.4088	22.6948	51.8939	89.2256	44.4229	191.648	184.26	144.584
1.10.7	1000	870	22.6695	31.9107	109.259	70.6743	68.4138	30.1279	25.4065	0.314837	1.44994	20.2799	47.4174	37.3571	21.0712	6.269	3.79614	6.18577	3.23884	90.0096	125.012	87.1616	97.0929	60.0507	47.4065	85.8866	130.316	71.4125	219.776	212.679	176.713
1.10.7	1000	871	43.0183	28.5508	0.072531	9.80287	25.9285	1.96517	3.53896	0.005745	0.005745	0.392819	15.8596	31.5978	0.845242	0.162298	2.41113	0.119928	2.23734	96.107	137.739	96.1102	79.4822	51.1889	41.1659	65.9221	105.997	59.2101	203.617	198.618	160.59
1.10.7	1000	872	10.2002	4.50509	0	0	0	0	0	0	0	0	0	0	0	0.001247	0	0.010393	0	9.40657	31.4523	20.0624	17.5263	12.4652	11.3361	15.5914	14.7601	11.3226	20.1501	14.5758	13.618
1.10.7	1000	873	252.209	138.841	0.017408	13.4436	25.9295	3.70424	6.24561	0.02344	0.024819	0.730093	22.8504	40.8885	0.585488	0.024991	1.2737	0.065667	3.54326	122.602	159.679	108.923	117.855	74.2356	55.425	90.6953	98.9481	57.9176	206.943	194.775	157.608
1.10.7	1000	874	19.0627	7.2909	0.002676	0.003058	0.001911	0	0	0	0.084098	0	0.000382	0.004587	0.016055	0	0.021789	0.162462	0.000382	4.43731	26.9656	15.8654	14.2836	5.95719	4.51262	12.5222	9.24579	5.21904	17.3632	12.3226	10.466
1.10.7	1000	875	33.8289	42.4662	0.003463	2.08959	124.337	32.5869	64.6574	3.67952	0.039252	4.5957	40.2985	82.7245	1.66797	60.1549	37.8294	0.489956	86.8979	88.6791	131.108	91.3925	86.5823	57.3163	47.8635	81.7225	153.064	83.8469	233.854	231.819	210.467
1.10.7	1000	876	17.7294	15.0868	0.009394	0.129697	11.2215	0.022907	0.275873	0.000165	0	0.058009	0.49555	0.144199	0.020765	0.004944	0.004285	181.072	10.2128	130.135	157.628	115.736	108.295	70.7856	56.3916	95.7989	136.087	78.1533	235.78	232.435	216.04
1.10.7	1000	877	12.2353	18.5546	0.014462	1.32553	7.86826	0.445964	0.977649	0.000789	0.002892	0.076519	6.19222	10.6881	3.84854	0.15777	0.106232	0.013148	0.001841	106.09	126.908	88.6469	160.261	84.9019	65.4986	162.554	152.656	91.2842	210.059	187.505	146.363
1.10.7	1000	878	17.6928	19.8393	0.177095	0.688465	4.76664	0.046473	0.083154	0.000498	0.00083	0.046141	3.72266	1.74506	0.928631	0.01278	0.317676	2.24332	1.35651	87.4186	118.225	80.7364	107.968	58.5592	44.3105	96.6865	118.05	64.7017	200.667	189.897	149.541
1.10.7	1000	879	14.751	19.9635	0.009913	1.48592	6.44726	0.356661	0.548176	0.001784	0.001388	0.038263	6.84457	9.07236	1.51447	0.014869	0.065821	0.05908	0.018834	76.4407	105.977	68.2359	138.763	57.9171	42.0299	137.182	130.009	68.8142	205.068	183.908	136.864
1.10.7	1000	880	50.0891	54.8224	1.52523	38.2498	139.829	62.3396	78.4193	11.0162	3.13583	13.5788	43.6717	66.3221	4.03489	40.9801	3.52025	0.34081	7.17757	98.0542	149.6	104.695	93.4611	63.9053	54.4449	82.9346	135.303	78.2511	222.974	217.555	185.329
1.10.7	1000	881	19.3858	25.3887	1.36902	4.0219	32.1713	1.91281	4.89092	0.000608	0.001014	0.107056	14.7149	10.6225	1.06995	0.085361	0.422952	6.3457	3.31569	66.939	106.018	72.7762	81.556	42.4442	34.841	74.4984	127.75	67.1969	215.685	211.892	176.607
1.10.7	1000	882	11.9147	7.57676	0	0.014005	0.025282	0.001455	0.003638	0	0	0.00291	0.025828	0.086213	0.394507	0.000182	0.014005	0.172244	0.008003	10.6832	35.6004	19.5897	30.4909	9.77847	5.70971	29.9389	28.3254	11.4307	37.189	29.7465	19.2037
1.10.7	1000	883	236.949	102.87	1.39554	14.2275	36.8154	5.02395	9.58299	0.019405	0.032618	0.654005	19.1891	16.1936	1.54377	0.238233	0.900908	6.09909	5.51239	85.9323	128.268	89.277	89.0334	54.6767	44.1647	76.5921	118.5	65.3262	217.884	212.151	177.985
1.10.7	1000	884	242.927	67.4412	0.087961	2.99487	0.94517	0.096127	0.125292	0.030331	0.029398	0.035231	2.11176	2.20625	0.159823	0.024032	1.34228	0.564396	1.19715	63.3201	101.374	67.8628	68.3231	38.8633	31.4942	48.4641	59.2529	35.0056	136.435	124.589	96.0749
1.10.7	1000	885	206.622	146.971	2.37838	31.251	37.8247	14.5031	14.8699	0.012741	0.011969	6.66023	35.3228	25.6961	0.12278	0.021622	0.513127	0.150193	0.605792	124.85	161.953	111.697	121.677	75.4695	57.3332	88.0255	90.8344	55.0985	210.358	197.756	161.88
1.10.7	1000	886	76.2013	41.3131	0.031034	7.30323	19.3279	1.07833	2.41952	0.016826	0.01776	0.067863	15.0821	27.3131	0.67134	0.026921	1.4685	0.207328	2.41653	83.1122	125.454	85.4593	83.6756	43.5915	35.0187	72.7551	106.576	56.6878	197.594	191.043	152.284
1.10.7	1000	887	208.548	110.927	9.6318	41.8423	50.0739	28.4411	24.8516	0.023992	0.034549	13.0282	42.009	38.6977	0.053743	0.254639	0.345809	0.084773	0.838132	105.616	147.234	101.33	96.1276	61.9981	48.516	69.6785	89.7678	52.8234	210.074	200.819	164.362
1.10.7	1000	888	0.002366	1.71535	0	0	0	0	0	0	0	0	0	0	0	0	0	0	0	6.7664	20.3668	12.8543	12.8935	10.265	8.96788	11.7519	11.4016	8.74003	14.2211	13.1494	11.5997
1.10.7	1000	889	18.9028	27.7323	0.270202	22.9028	73.322	16.7879	29.6919	0.022727	0.536616	10.0051	33.9432	116.905	9.38258	22.3194	5.16793	0.135101	0.083333	79.8245	112.665	81.4508	133.813	69.7374	59.7096	140.717	148.539	89.4369	163.069	146.903	122.527
1.10.7	1000	890	246.041	155.073	1.5662	21.185	59.5157	18.8095	26.0253	0.018293	0.027294	5.17944	32.5049	45.8705	3.51365	1.77004	1.59117	2.46458	6.79675	119.359	159.547	114.35	115.225	75.9413	60.2721	95.5584	129.416	75.6217	225.956	220.487	190.968
1.10.7	1000	891	57.1738	13.6797	0.022995	0.17861	0.026738	0.01016	0.019251	0.008021	0.007487	0.005348	0.112299	0.135294	0.178075	0.013904	0.788235	0.801604	0.170053	4.35775	22.5957	14.8529	13.8497	5.26257	5.20588	10.739	10.4845	6.43476	17.2075	13.7701	13.2594
1.10.7	1000	892	253.286	190.943	1.27808	41.168	77.9726	32.2419	37.597	0.020746	0.144118	16.6643	47.8894	118.592	0.532333	8.42022	1.57978	0.029353	0.933348	138.214	179.298	130.014	117.563	84.7416	67.2949	89.0731	107.731	66.9762	225.298	218.3	188.425
1.10.7	1000	893	12.7913	11.5023	0.551508	0.693855	0.397318	0.05743	0.058771	0.000894	0.00067	0.174749	0.376983	0.618547	0.487151	0.012514	0.181676	2.43911	1.16112	11.4673	34.7618	21.444	37.0677	8.75844	7.28357	28.0324	34.2456	15.6863	67.3173	61.6936	47.24
1.10.7	1000	894	10.2902	3.33925	0	0	0	0	0	0	0	0	0.000219	0	0	0.000219	0	0.006355	0	5.95836	30.4883	18.2047	16.2599	8.48871	6.54657	12.2207	11.6307	10.4087	14.4442	13.2805	12.59
1.10.7	1000	895	87.0093	38.893	0.548196	3.78119	17.3276	0.639948	1.31314	0.018041	0.014948	0.066495	5.43763	1.79253	0.390206	0.115464	0.861856	58.8041	4.35954	93.9338	129.544	90.9289	93.5423	56.4101	44.8729	82.3603	124.24	68.7005	224.11	218.383	188.091
1.10.7	1000	896	104.783	87.5979	0.319935	17.4458	30.9105	6.64533	9.32994	0.020917	0.022736	0.815933	25.0147	32.3077	0.624591	0.041106	1.67552	0.292834	2.74154	102.827	141.405	96.4489	104.669	59.6853	45.7788	84.7177	108.764	60.2799	208.532	199.703	162.111
1.10.7	1000	897	249.596	194.844	0.24778	6.54389	22.5782	1.69672	4.41872	0.01554	0.021346	0.20099	16.0996	6.82582	1.32565	0.013832	0.356045	3.0596	5.12346	134.754	169.423	119.713	132.323	87.1416	66.6078	100.086	106.606	65.82	219.86	209.601	175.847
1.10.7	1000	898	21.2542	31.1045	1.02544	24.4867	69.9777	24.0099	28.8805	0.059658	0.048176	6.68077	33.984	58.2384	1.20013	8.00878	3.86222	1.07812	1.52859	101.644	144.572	103.997	102.113	64.8073	52.6128	90.6096	134.26	77.7888	224.174	219.136	186.502
1.10.7	1000	899	15.824	22.4686	0.138525	7.89134	23.6545	2.80244	3.69699	0.002068	0.001149	0.295658	17.3444	32.8259	1.2821	0.181714	0.314036	0.349184	0.52975	58.6451	95.1404	61.7781	109.092	40.5265	31.0283	103.511	110.485	56.2272	194.977	178.493	136.313
1.10.7	1000	900	192.449	229.279	0.772757	19.172	54.2084	15.302	23.8079	0.013004	0.025033	4.87549	34.3235	37.2598	0.150195	0.243498	1.36118	0.243823	4.6749	173.888	200.522	148.73	172.084	120.984	91.5988	134.983	124.793	81.1538	230.876	222.805	195.457
1.10.7	1000	901	15.598	24.8989	0.030635	15.5783	38.3764	7.80107	9.42152	0.00557	0.010543	0.941118	24.1969	50.9421	2.24468	0.644321	0.555202	0.104834	0.044957	63.4195	101.377	66.6115	132.068	51.2526	39.738	131.005	131.267	69.9035	210.169	193.747	152.92
1.10.7	1000	902	13.83	12.3968	0.002677	0.029451	0.669153	0.009753	0.021801	0.000191	0	0.003825	0.19411	0.041691	0.002104	0.004399	0.001147	112.393	1.61771	73.2394	102.673	69.3068	72.0266	34.9688	27.2228	60.8361	91.9661	46.8682	199.13	189.459	151.749
1.10.7	1000	903	47.6769	54.8505	4.38792	44.4374	76.725	40.8803	38.7749	0.050799	1.15644	17.5553	49.4379	98.0167	0.31422	13.7895	5.60035	0.051376	1.84126	108.517	151.802	108.806	102.427	67.8636	54.7275	87.6236	125.149	73.3685	224.904	219.3	187.025
1.10.7	1000	904	146.948	168.281	11.3963	50.5953	84.3485	38.9134	40.6526	0.054808	0.520187	22.1988	55.7016	79.441	0.12756	4.02048	0.829335	0.055003	0.344841	150.957	186.987	136.011	137.555	94.4145	72.9741	102.185	109.806	68.9001	227.385	219.877	190.721
1.10.7	1000	905	10.5705	7.78017	0.003709	0.125084	0.083277	0.025287	0.033041	0.001011	0.000674	0.012812	0.066082	0.028321	0.00708	0.007755	0.002697	154.502	1.79299	65.5863	83.677	56.0516	78.3473	46.1301	35.3614	63.467	67.0644	38.7293	101.545	88.0388	66.2347
1.10.7	1000	906	10.9469	8.70139	0.022349	0.08822	0.141657	0.001176	0.016972	0	0	0.0531	0.157957	0.281633	0.939338	0.003865	0.044362	0.146026	0.037137	6.11897	28.4478	13.7631	37.1526	6.40548	3.12183	35.5245	30.8891	9.32448	46.754	33.4517	20.4188
1.10.7	1000	907	12.2128	14.7738	0.001233	0.367	1.26119	0.050068	0.136638	0.00074	0.005919	0.004686	2.40449	3.64287	2.52929	0.012455	0.023307	0.001726	0.002343	21.9202	53.4768	29.5099	121.894	27.1622	18.7608	130.37	106.833	49.5895	163.498	129.085	89.9295
1.10.7	1000	908	166.127	79.9276	0.540555	7.11268	33.9793	2.92216	8.41807	0.028851	0.035384	0.2319	12.9194	8.52205	1.70985	0.193794	1.41589	15.1138	7.67392	137.118	166.673	120.894	126.112	86.2145	68.0664	107.091	136.214	82.8808	228.603	222.627	195.167
1.10.7	1000	909	106.236	123.484	6.75737	45.5203	72.4039	33.8802	34.24	0.03104	0.482325	18.0845	50.5798	70.5042	0.135196	1.94465	1.09588	0.016555	0.775823	136.754	173.965	124.867	127.662	85.393	66.7086	97.612	113.331	69.6901	224.818	217.172	185.764
1.10.7	1000	910	13.2821	12.1786	0.027969	0.116998	0.401418	0.008864	0.05003	0.000591	0.000591	0.046681	0.347252	0.782943	1.17885	0.011621	0.048454	0.262557	0.057317	42.8588	71.9994	44.0134	98.6193	35.1286	25.4967	105.29	96.7648	48.2874	133.915	112.651	77.1582
1.10.7	1000	911	11.8439	9.53501	0.049443	0.143328	0.06797	0.002614	0.005569	0.000455	0.000114	0.037622	0.099	0.167538	0.893499	0.001932	0.038759	0.239827	0.048761	25.5864	52.5082	29.5912	74.1193	22.3563	13.9694	78.6225	69.2535	30.3547	95.6624	75.717	48.7017
1.10.7	1000	912	168.862	69.6688	0.38675	9.11191	26.1307	5.38227	6.19696	0.017905	0.033124	1.23008	9.1692	4.92748	21.5336	2.40018	1.11817	209.62	36.667	125.502	157.604	114.311	125.047	77.0564	60.8648	105.723	130.749	76.9078	227.219	220.574	194.87
1.10.7	1000	913	245.087	220.124	22.8237	52.107	76.0968	43.5863	43.2973	0.049505	0.944699	25.1188	53.9604	55.9085	0.587539	1.99034	0.826853	0.857522	0.389519	159.598	190.223	139.48	153.63	107.566	82.6766	115.355	115.511	74.9266	227.903	219.013	190.257
1.10.7	1000	914	12.4254	10.6733	0.100034	0.092987	0.12891	0.006875	0.002234	0.000344	0.000172	0.002234	0.221898	0.083878	0.024235	0.002406	0.009282	96.8137	1.12014	40.2427	66.0583	42.6899	61.5304	20.424	15.5892	49.8756	63.9493	30.7946	141.621	128.988	96.7693
1.10.7	1000	915	24.722	25.2253	0.395257	5.23649	122.126	26.6522	52.6001	5.89196	0.061924	4.08366	27.583	55.6838	8.64361	45.4625	2.97167	13.6634	18.419	61.0171	91.5369	60.1034	83.4592	37.4875	29.8228	69.5922	106.225	52.4848	204.796	192.651	150.97
1.10.7	1000	916	8.09024	4.05309	0	0	0	0	0	0	0.00063	0	0	0	0	0	0.004197	0.016369	0.00042	7.57083	22.2166	15.8642	17.8344	11.6128	9.15698	13.6214	11.5265	9.12697	16.8288	13.6821	12.8967
1.10.7	1000	917	243.631	164.951	0.004326	3.62795	54.0829	10.8176	25.4256	0.017637	0.031281	0.73178	27.3255	35.8662	0.11015	2.60965	58.0439	0.064892	135.278	126.016	163.905	116.582	112.217	76.6063	60.4319	87.2017	126.755	73.7008	228.941	224.497	198.603
1.10.7	1000	918	77.6937	84.641	1.37844	32.2578	47.3356	22.0313	22.278	0.016799	0.035674	6.71631	38.7827	66.6982	0.519253	0.236882	4.37542	0.077576	3.76916	100.307	144.401	99.9175	98.047	57.6142	45.7269	79.786	105.748	59.6601	212.859	205.232	169.016
1.10.7	1000	919	71.2044	62.2425	0.012203	2.35906	63.5714	9.4216	27.4835	0.027151	0.015863	0.277913	27.2596	35.8819	0.466138	4.92831	18.6937	0.418548	62.8667	96.0223	140.113	99.5671	83.7706	56.4222	47.1059	79.3023	145.08	80.1861	231.27	229.146	205.37
1.10.7	1000	920	26.147	28.594	0.906025	11.0608	20.9204	2.4906	3.42067	0.00304	0.001935	0.312327	18.772	30.4859	2.29768	0.391376	2.06634	0.50691	3.61056	39.8914	79.4914	51.2197	60.7747	17.191	15.2833	45.798	81.2949	37.9442	176.616	169.103	129.575
1.10.7	1000	921	8.9526	5.28593	0	0.07263	0.21789	0.04893	0.059633	0	0.006116	0.112385	0.029817	0.156728	0	0	0.047401	2.74388	0.043578	1.51376	12.4763	11.5787	8.5948	4.21177	6.35168	9.30199	18.2171	13.3058	10.1904	12.4878	15.919
1.10.7	1000	922	233.28	178.757	1.42992	37.7971	152.451	69.5199	90.4435	17.1715	6.0408	18.2835	48.614	75.9383	6.40481	55.8525	3.48013	2.10042	18.5743	143.368	184.134	136.237	133.178	98.455	80.6883	108.396	141.328	89.2762	231.522	226.704	201.922
1.10.7	1000	923	171.334	68.7992	0.332106	13.5268	61.9497	14.5472	27.1035	0.027812	0.02454	1.90307	27.2871	46.9444	1.11616	2.70634	10.9153	1.55746	76.5035	117.116	154.469	109.443	105.845	68.326	53.8086	92.1611	135.618	77.2119	227.407	222.438	193.607
1.10.7	1000	924	52.6776	36.5531	0.044604	19.3378	26.2993	4.70404	6.25503	0.009795	0.014693	0.302082	24.0549	56.402	0.240161	0.027462	5.55903	0.019416	2.4142	70.519	114.057	75.9388	73.1237	35.5709	29.4896	60.4621	94.1721	48.9022	193.574	185.927	145.938
1.10.7	1000	925	165.676	121.094	6.92893	41.1382	64.3835	32.0233	32.1222	0.023866	0.125166	15.1774	45.2625	57.2273	0.448157	2.23018	1.76929	1.17237	2.49589	117.064	156.529	110.27	110.249	71.5579	56.0058	88.2315	113.826	66.8115	221.779	214.424	181.328
1.10.7	1000	926	249.569	106.605	0.08718	13.1282	22.7034	2.20259	3.94686	0.026403	0.027566	0.225839	19.8215	35.3774	0.47177	0.026735	1.35653	0.088841	2.02956	98.0907	141.185	96.4151	88.8095	54.7999	43.9379	69.6994	91.8779	52.2667	197.745	188.26	150.715
1.10.7	1000	927	22.772	24.2531	0.000642	1.29672	33.8516	1.77714	6.80218	0	0.000642	0.805395	8.87604	7.28838	0.565189	1.50739	4.78099	124.413	175.001	93.6159	123.996	86.2087	101.813	56.2736	44.5189	89.9685	134.885	73.0238	226.621	221.605	190.78
1.10.7	1000	928	65.9454	64.2879	0.881994	30.7667	43.3971	20.6043	18.7063	0.029162	0.042048	5.95727	36.3937	71.6331	0.940997	1.0217	1.59851	0.036623	0.779586	89.3188	130.561	89.0268	119.07	59.7748	46.5351	108.988	118.497	66.0387	211.009	198.436	159.871
1.10.7	1000	929	17.087	25.9441	0.274928	24.5816	55.7516	15.0945	21.2553	0.002882	0.043228	8.31643	34.1954	108.043	6.82651	16.6651	5.9683	0.003458	0.074352	44.913	70.555	37.1009	138.582	39.6738	27.5522	141.904	119.617	55.253	185.466	140.467	91.996
1.10.7	1000	930	17.059	15.979	0.355786	0.460247	3.02253	0.046599	0.070671	0.000442	0.004417	0.013251	1.03975	0.194125	0.129859	0.00265	0.070451	50.932	0.990283	95.208	122.386	84.7962	92.1765	53.7409	41.3322	82.0307	113.722	61.6996	204.676	195.191	156.011
1.10.7	1000	931	124.849	157.223	0.183598	12.0139	48.0622	11.2889	19.7255	0.018831	0.025273	1.67889	28.663	29.6628	0.681368	0.558969	1.70961	2.33994	7.58573	150.816	183.894	133.9	147.746	99.1702	76.193	119.31	129.777	79.7859	228.499	221.588	193.424
1.10.7	1000	932	14.8967	14.4238	0.715293	1.30211	1.08418	0.141913	0.172763	0.002424	0.001763	0.241736	1.19237	1.46717	0.750551	0.052887	0.517188	5.01939	3.9751	11.9667	37.1758	21.8955	43.405	6.85787	5.29022	30.8429	39.898	16.0859	90.7821	81.6928	59.6902
1.10.7	1000	933	13.3504	14.3988	0.001327	0.40146	2.37824	0.44061	0.50365	0	0.040478	0.095554	2.23358	5.80159	4.98938	0.265428	0.07432	0.001327	0.001991	45.6204	69.7618	42.5674	116.518	41.5879	32.2847	135.575	115.075	61.4273	110.622	87.9204	61.4479
1.10.7	1000	934	250.209	123.625	0.520734	31.2016	45.969	19.3124	20.5291	0.017159	0.025262	7.68208	37.5832	72.1852	0.10367	0.063632	0.928027	0.031459	0.914204	121.568	159.34	108.436	114.532	73.0102	54.6308	85.336	93.6375	55.2591	210.097	198.476	161.852
1.10.7	1000	935	0	0.000656	0	0	0	0	0	0	0	0	0	0.000164	0	0	0	0.009519	0	6.1674	16.2306	11.8649	14.3786	11.2022	9.24881	0.05334	0.054817	0.042672	13.7883	12.4563	11.1065
1.10.7	1000	936	11.2995	9.33515	0.000272	0.024796	0.082289	0.002725	0.004087	0.000272	0.000272	0.008447	0.114714	0.011172	0.00109	0.000272	0.002725	124.841	1.53324	30.2935	55.3281	34.7624	49.4025	14.2373	10.6564	39.3477	50.7155	23.2856	112.749	102.042	75.9861
1.10.7	1000	937	134.249	87.2988	0.912345	26.9194	55.318	21.6708	25.2488	0.028731	0.052106	6.31605	35.6209	65.1429	2.00146	1.94887	2.47383	0.626004	4.98466	117.318	155.514	109.292	114.146	71.5817	55.5181	96.335	123.505	71.3185	221.229	214.283	180.588
1.10.7	1000	938	111.776	113.39	0.720688	15.2413	37.9848	8.38856	13.078	0.020408	0.02561	1.40936	27.2753	27.401	1.28811	0.15006	3.17327	1.15926	7.15006	79.2493	119.855	80.4014	83.1104	39.8988	32.1689	68.6739	104.657	54.6367	206.499	199.054	161.481
1.10.7	1000	939	167.065	30.08	0.08046	1.49425	0.343943	0.046419	0.056587	0.025641	0.02122	0.021662	0.614943	0.706897	0.234306	0.016799	0.503095	2.8382	1.12776	50.0486	83.5575	55.5791	61.9399	33.3378	26.8081	45.6848	54.3059	31.8705	114.701	103.488	79.1733
1.10.7	1000	940	14.7338	15.6475	0.290181	0.395153	2.61012	0.040181	0.075716	0.000502	0.000628	0.014691	1.27486	0.262054	0.246359	0.003516	0.009794	34.5003	1.8163	62.4969	93.4874	62.4581	78.636	37.1552	28.6654	67.1421	99.032	50.4695	187.103	178.769	138.265
1.10.7	1000	941	56.2998	46.1499	0.420108	14.2753	34.7412	5.66716	9.14446	0.021491	0.013455	0.264623	22.738	26.302	0.817417	0.051953	2.02635	0.960755	2.24949	71.3949	114.37	77.7864	79.1964	39.3222	32.4089	68.1717	109.648	57.2616	205.602	199.844	161.829
1.10.7	1000	942	247.749	135.227	0.497766	21.2517	37.4371	11.4706	14.1549	0.029039	0.032018	2.24088	28.7189	58.4319	1.36337	0.297841	4.28071	0.081534	3.98436	84.3016	131.611	91.14	78.8853	44.3853	39.2342	63.1199	94.8779	52.799	200.225	192.661	156.529
1.10.7	1000	943	7.88802	4.10634	0	0.000182	0	0	0	0	0	0	0	0.014543	0	0.002363	0.02236	0.013089	0.001818	7.23723	13.9153	9.75877	16.5972	13.3049	8.32358	13.4107	11.9473	8.20378	15.4801	12.6839	10.7593
1.10.7	1000	944	251.497	235.104	0.557938	10.5938	37.31	6.58661	13.5579	0.012768	0.019513	1.0913	23.8318	27.1633	1.35774	0.015418	1.45194	1.43435	6.17514	125.939	162.688	115.598	118.063	77.5722	61.3365	90.4115	110.166	66.1125	217.018	208.254	175.773
1.10.7	1000	945	30.3116	30.083	0.029577	13.339	23.9712	3.17998	4.95697	0.003549	0.002366	0.101154	19.8276	34.6649	0.497634	0.031943	3.61846	0.082076	1.82032	70.3287	112.868	75.8852	76.0581	37.1433	30.1545	64.0262	102.979	53.2743	197.687	191.91	152.48
1.10.7	1000	946	14.3081	15.3538	0.216046	0.295094	2.69009	0.041835	0.060085	0.000474	0.000948	0.002607	1.16331	0.251837	0.112941	0.002963	0.018488	62.7912	1.51766	69.0186	100.28	67.9138	86.6055	42.9249	33.0615	75.8203	106.937	55.5971	196.56	187.873	148.244
1.10.7	1000	947	7.69763	3.94686	0.000181	0	0	0	0	0	0	0	0.003072	0	0	0	0	0.062353	0	3.86156	13.9794	9.42256	13.7076	9.09254	10.6718	12.281	10.1811	8.69058	13.2301	11.8303	12.6029
1.10.7	1000	948	154.332	172.78	18.4223	58.6458	107.473	56.3779	59.1754	1.0549	5.28276	30.437	64.5222	109.712	0.574345	21.8052	3.05738	0.009655	1.79007	168.018	197.409	148.673	150.002	109.084	85.251	115.004	126.749	82.0323	232.815	227.503	202.995
1.10.7	1000	949	13.4751	7.6463	0.020114	0.252751	0.4463	0.127514	0.163947	0	0	0.1074	0.185958	0.391271	0.314991	0.000759	0.349905	20.8577	0.16926	48.6459	72.4816	51.2288	52.285	32.7605	27.2163	42.3564	47.0421	29.7567	60.9055	59.5214	49.5681
1.10.7	1000	950	79.8055	90.1688	1.63745	25.8713	57.742	21.1873	25.1051	0.027568	0.108973	5.79194	36.3389	52.651	1.01274	1.54226	2.15319	0.671521	4.31105	126.586	165.231	119.534	126.537	82.9022	65.2466	108.292	132.975	79.3295	225.566	219.378	188.837
1.10.7	1000	951	34.2531	35.0834	0.244464	14.4742	157.608	60.271	85.7256	18.2844	2.99653	25.9991	48.3743	117.934	42.0334	95.1194	38.6843	11.8706	237.679	79.8589	112.528	77.4082	103.532	59.7781	48.5493	99.9253	158.221	86.9692	229.512	225.475	196.301
1.10.7	1000	952	109.451	69.5744	2.61376	40.2833	76.0876	39.1957	39.9029	0.034114	0.676496	16.3114	46.6649	115.282	2.13703	15.488	5.19572	0.210176	5.33536	114.597	155.245	109.832	106.988	69.2625	54.6664	92.7332	126.778	73.6548	224.398	218.465	185.929
1.10.7	1000	953	0.009578	1.42229	0.000435	0	0	0	0	0	0	0	0	0	0	0	0	0.027862	0	4.06879	11.8337	8.12016	11.9835	8.14149	7.47497	13.0109	12.367	9.89421	13.9438	12.6957	11.3735
1.10.7	1000	954	37.5874	39.4899	0.596022	19.295	57.0155	16.5642	24.389	0.011492	0.009724	2.6568	31.352	65.564	0.665193	1.09658	3.58033	0.394254	69.4667	94.3936	134.893	93.5545	102.185	56.6981	44.9089	94.0002	129.838	70.8451	221.67	215.64	181.164
1.10.7	1000	955	180.093	128.436	5.73802	67.0655	218.024	116.76	138.644	51.7811	25.2204	30.9297	62.2077	87.3211	4.59904	92.4585	3.83706	2.89617	9.17891	152.612	194.259	145.973	130.212	104.201	86.8259	111.835	153.925	98.4776	232.458	228.268	204.415
1.10.7	1000	956	10.2956	3.41385	0	0	0	0	0	0	0	0	0	0	0	0	0	0.001574	0	7.131	31.8657	19.9493	15.5277	12.371	9.23249	11.4418	11.8367	9.26416	17.7632	13.2262	14.1829
1.10.7	1000	957	7.63873	3.88717	0	0	0	0	0	0	0	0.002653	0.00437	0	0	0	0.001404	0.018102	0.001248	5.09925	15.8483	10.7904	14.2403	12.0538	12.1434	10.8848	12.0384	8.70162	14.8477	12.5417	11.0947
1.10.7	1000	958	0.001202	0.00618	0	0	0	0	0	0	0	0	0	0.000172	0	0	0	0.064721	0	5.28189	15.9804	10.4719	12.8584	7.87519	7.77768	0.076052	0.077253	0.059227	13.9444	12.5241	10.9253
1.10.7	1000	959	242.928	171.702	0.022201	7.90578	48.3479	9.96586	21.7271	0.020149	0.024067	1.14925	26.4922	37.3683	0.372015	0.551306	8.54067	0.172761	73.9849	136.903	172.062	122.234	128.245	84.3035	64.8951	99.9862	122.977	72.8009	226.553	220.05	191.26
1.10.7	1000	960	22.6568	25.7721	0.180931	6.04949	23.5158	1.94188	3.58388	0.003178	0.003632	0.197957	15.3287	27.0445	0.936209	0.172758	1.01271	0.384563	2.05471	84.4168	118.349	80.4965	106.47	53.8788	41.0931	95.6622	118.556	63.7705	202.988	192.019	151.533
1.10.7	1000	961	11.6743	11.5379	0.001271	0.142984	0.692552	0.031774	0.115023	0.000254	0.017539	0.044357	0.982842	1.49822	1.53266	0.020208	0.035333	0.000635	0.001779	15.2509	41.8305	21.4814	83.4526	14.5072	7.8851	87.3123	69.8697	26.6229	114.766	83.015	52.2534
1.10.7	1000	962	8.77628	6.26978	0.03626	0.034664	0.006385	0	0	0	0	0.013683	0.017104	0.000456	0.037856	0.000684	0	129.874	0.412771	3.95302	15.683	10.8981	16.0805	6.36009	5.83763	11.5669	16.1161	8.0935	16.6673	15.2924	14.2479
1.10.7	1000	963	138.102	45.5148	0.056581	4.31714	15.9356	0.3288	1.56969	0.023069	0.023312	0.025255	8.56508	8.04638	0.971588	0.021855	0.620204	6.13647	2.8832	105.606	142.092	98.9432	97.3817	61.0032	47.6105	84.8477	117.159	66.279	210.445	203.244	166.246
1.10.7	1000	964	24.5659	35.8022	10.7957	64.0878	108.282	64.4467	56.882	1.66019	8.13467	34.378	65.4224	192.272	2.52777	49.4058	15.8563	0.009372	0.569073	97.2221	143.361	100.548	84.0566	53.2152	44.769	71.3818	121.955	68.5528	226.798	222.337	191.111
1.10.7	1000	965	22.8064	28.755	1.44963	9.77894	45.8961	6.91396	13.4753	0.009969	0.004547	0.456453	23.0495	33.8664	1.89962	0.878279	1.4213	2.97691	3.64428	64.7242	103.036	69.1004	81.684	37.9454	30.6719	71.8968	119.143	60.6076	210.529	204.983	166.449
1.10.7	1000	966	15.0096	15.2874	0.011241	0.158358	3.3115	0.024112	0.015966	0.000815	0.02737	0.001792	0.860378	0.185728	0.053275	0.001629	0.005702	95.6821	2.08488	84.4241	114.388	78.833	94.3428	50.8604	39.2734	84.1815	114.758	61.4814	208.541	199.857	162.088
1.10.7	1000	967	148.058	66.4841	5.95145	52.404	76.6906	41.2718	39.0007	0.026223	0.995039	21.5443	54.3324	154.292	0.987952	18.9036	4.04394	0.023033	0.953579	96.1729	142.866	99.0974	77.8689	51.6488	43.6549	65.1396	102.862	58.5918	217.846	211.508	176.382
1.10.7	1000	968	13.9959	16.5095	0.827273	0.994063	6.72987	0.116327	0.166048	0.000557	0.002041	0.0141	3.38757	1.09481	0.878108	0.015213	0.007236	53.3017	2.8872	51.2731	85.1338	56.5425	75.6199	32.1711	25.4362	65.7351	106.189	52.9022	199.267	192.645	153.076
1.10.7	1000	969	200.407	92.5987	0.22514	6.43549	10.1632	0.539521	0.77231	0.020143	0.029322	0.068078	11.7292	9.55941	1.35773	0.022183	0.630801	2.78225	2.20729	78.8983	120.108	81.4184	84.0079	44.0507	35.654	66.9895	90.5864	49.1443	189.184	179.556	141.729
1.10.7	1000	970	11.9106	12.8884	0.00095	0.300459	0.661548	0.01488	0.047174	0.000158	0.000633	0.003008	1.19202	1.95647	2.3766	0.009498	0.019946	0.000158	0.000475	37.9775	63.6215	35.0443	134.504	40.4383	25.6589	141.246	112.001	51.4933	172.038	132.294	87.4002
1.10.7	1000	971	77.7965	49.1883	0.018882	3.97793	33.2648	2.73198	8.83399	0.020598	0.022315	0.093428	16.41	17.6329	0.905101	0.039971	4.28004	2.28028	80.4031	93.1018	132.985	92.4461	94.3928	53.357	42.5321	84.0669	122.42	66.9693	215.584	209.913	174.936
1.10.7	1000	972	19.4617	22.5559	2.52636	5.58826	42.7987	3.05791	7.14976	0.029952	0.000399	0.960463	14.7053	16.6889	1.27716	0.530751	0.365415	74.9085	8.41933	66.8674	101.343	68.1258	90.4657	42.0563	33.1158	79.2256	122.567	62.8686	215.695	208.629	171.142
1.10.7	1000	973	7.73332	3.95957	0.000166	0	0	0	0	0	0	0.006654	0	0.001497	0	0	0.009815	0.075195	0	4.27416	13.3088	11.6485	11.0774	7.17468	9.45517	12.0233	11.0504	7.68408	13.7982	11.7335	9.66811
1.10.7	1000	974	8.60662	4.33724	0	0.003911	0	0	0	0	0	0.00138	0	0.003451	0	0	0.00046	0.05521	0	6.47044	20.9429	14.144	14.9002	8.80814	8.91258	14.8242	14.8742	12.1721	16.8574	14.9367	13.8447
1.10.7	1000	975	20.5887	17.3107	0.013501	0.13686	15.1703	0.01831	0.10135	0.000185	0.00037	0.177178	0.306455	0.250416	0.003884	0.000555	0.010172	90.1581	0.184021	128.528	159.349	117.268	101.265	70.4727	56.5363	89.8019	140.732	80.4559	237.101	235.159	224.464
1.10.7	1000	976	9.76985	3.71761	0	0	0	0	0	0	0	0	0	0	0	0	0	0.002071	0	6.57514	26.4925	17.0474	13.0923	6.49551	8.31807	12.9669	11.9804	9.73418	15.3158	12.2934	11.2058
1.10.7	1000	977	22.299	22.0345	0.033629	1.26383	13.0462	2.11984	3.79303	0.01284	0.003669	0.155304	11.0128	8.3528	1.5989	0.3797	10.0914	11.8147	239.942	45.6172	74.2703	49.2745	70.126	25.0217	20.0349	51.7108	82.5769	40.4766	173.756	164.829	125.45
1.10.7	1000	978	10.2355	3.46723	0	0	0	0	0	0	0	0	0	0	0	0	0	0.006002	0	8.26579	32.1124	20.1208	14.6874	12.7767	13.1465	13.3345	12.8944	10.1508	15.1383	13.8905	12.0694
1.10.7	1000	979	22.7088	33.3169	0.026947	0.877086	55.3039	6.51113	21.6422	0.003129	0.001217	0.171592	25.1168	36.7342	1.05685	3.39725	11.1344	0.170723	48.9513	71.0527	113.354	77.8467	73.5096	40.9915	35.0049	68.1504	136.987	71.7935	226.296	224.392	195.969
1.10.7	1000	980	252.292	132.945	0.050899	2.73624	2.77616	0.298392	0.188079	0.026112	0.025733	0.131693	7.93832	4.37843	0.075118	0.019678	0.207947	0.152129	1.79054	105.891	144.245	95.9799	105.339	64.9307	48.4763	75.9658	73.7026	44.8008	179.856	162.048	126.614
1.10.7	1000	981	26.1014	18.4533	0.052575	1.11373	5.02629	0.130901	0.315987	0.001073	0.001073	0.837446	2.29453	3.44152	0.649678	0.062768	0.934549	9.64968	2.772	131.088	156.345	112.233	109.598	73.7672	57.4077	94.1116	119.952	71.492	203.472	193.552	157.009
1.10.7	1000	982	232.106	126.386	0.169605	13.2309	41.8119	24.6717	17.5441	0.062133	0.699412	6.76322	32.2175	59.9051	118.898	5.61797	6.46516	1.56507	5.72376	107.871	146.029	102.213	109.4	63.0336	50.4383	91.728	123.696	69.5181	215.497	208.018	173.093
1.10.7	1000	983	252.953	242.894	0.271208	16.2768	42.3046	9.65067	18.2307	0.006331	0.017726	4.31147	29.8388	50.9086	0.319321	0.006964	1.02887	0.081033	1.15396	163.448	193.897	140.418	160.893	113.244	85.1624	123.489	111.375	72.6238	224.989	213.755	182.348
1.10.7	1000	984	183.006	67.5705	0.39054	36.8124	67.4452	24.3317	28.5813	0.032279	0.087568	10.9051	42.519	124.629	0.360818	9.52573	2.88335	0.027165	1.45893	105.326	151.55	106.783	84.5494	58.381	48.1435	71.3186	109.106	62.9939	220.488	214.794	180.662
1.10.7	1000	985	249.951	141.472	3.73301	35.8977	46.3172	24.4992	23.1598	0.020122	0.028914	11.1495	39.8145	33.336	0.02046	0.033649	0.08742	0.130538	0.279675	119.227	159.767	109.851	110.642	70.8886	54.1339	77.0746	84.2459	51.3057	208.501	196.959	161.461
1.10.7	1000	986	59.4753	60.0014	0.064552	4.56579	8.63145	0.595034	0.645241	0.027862	0.025931	0.074207	12.2836	8.4549	0.773793	0.030621	0.310621	1.48552	1.82952	84.7945	122.474	82.3545	108.133	53.5732	40.7277	92.3462	103.396	56.7539	195.507	183.255	144.41
1.10.7	1000	987	10.3007	3.31562	0	0	0	0	0	0	0	0	0	0	0	0	0	0	0	8.74203	31.9346	19.8668	14.0123	11.9291	7.80416	11.5828	11.0697	10.3631	16.4368	14.9353	10.5384
1.10.7	1000	988	26.4547	37.5696	0.160558	0.938161	71.116	11.6294	32.3375	0.025635	0.002923	0.344502	28.1021	37.5476	0.014841	11.5667	130.556	0.236339	111.964	95.9917	137.928	97.2743	83.7646	59.3281	48.8894	76.9811	147.678	82.0371	233.484	231.115	208.628
1.10.7	1000	989	248.592	167.636	8.80031	57.9852	105.907	53.383	54.8902	1.21808	4.78805	31.5066	62.5633	175.585	5.42492	37.5776	6.74668	0.021961	1.07814	142.678	183.682	135.495	117.018	86.8269	69.764	91.9249	118.351	72.9816	230.442	225.438	198.875
1.10.7	1000	990	11.1945	8.31829	0	0.000531	0.067092	0	0	0.000177	0	0	0.009559	0.000177	0.000708	0	0	247.129	25.3808	124.329	146.898	105.79	100.717	65.114	51.2801	80.65	96.4378	57.1175	218.847	205.723	173.624
1.10.7	1000	991	17.934	13.6138	0.011663	0.01966	1.30873	0.003166	0.011496	0	0.000167	0.000333	0.073142	0.033156	0.56881	0.004832	0.004832	7.37288	0.003499	99.8954	133.587	93.907	72.4642	52.5756	42.134	62.2932	112.862	61.7782	234.63	231.238	211.406
1.10.7	1000	992	28.7749	19.0435	0.032969	1.0819	3.34817	0.01827	0.040739	0.00273	0.00126	0.070139	2.10332	1.80596	0.48656	0.00756	0.251575	4.41012	1.86728	102.714	134.739	92.0315	91.0586	53.4882	41.2547	77.0607	106.102	58.4519	192.794	184.262	144.659
1.10.7	1000	993	14.591	11.4423	0.001199	0.065963	0.951787	0.003118	0.00024	0.00072	0.00072	0	0.036699	0.00048	0.003838	0.00024	0.002639	104.684	0.288079	98.5016	128.962	90.2363	73.882	45.255	36.1053	60.2708	98.2816	52.5423	229.754	223.869	197.32
1.10.7	1000	994	247.653	114.817	1.94523	38.408	67.2353	36.2863	36.4651	0.046653	0.150681	14.3822	43.8722	90.113	0.578383	6.76702	2.5468	0.325123	2.58099	103.279	150.53	106.122	87.6813	59.2599	48.8887	69.4683	104.735	60.3993	218.383	212.125	178.471
1.10.7	1000	995	79.8613	67.7839	0.712903	30.4887	66.3113	32.4887	31.3048	0.085484	0.41129	19.721	44.9339	225.831	47.1516	47.5823	24.3387	0.506452	8.09193	103.192	144.26	100.382	104.266	64.2177	51.2581	91.2339	136.506	75.929	225.485	220.526	187.873
1.10.7	1000	996	22.8784	36.5179	9.11876	56.5848	107.355	55.1758	54.4043	1.35203	5.5754	30.509	60.8893	167.719	8.92601	51.8148	17.6649	0.037229	1.39444	89.8671	117.3	71.6904	145.331	70.1626	53.1357	143.59	147.267	82.5495	222.343	201.354	155.637
1.10.7	1000	997	13.4313	13.262	0.036465	0.051084	0.990473	0.008541	0.073423	0.000493	0.001807	0.01889	0.373357	0.125329	0.048292	0.008377	0.005256	133.762	5.77152	63.1477	92.7625	61.9842	82.83	36.2516	27.661	71.3055	94.253	48.1593	186.693	175.58	136.544
1.10.7	1000	998	17.6306	16.3134	0.066578	0.521566	9.7244	0.135368	0.137138	0.000221	0.000664	0.032736	1.6576	0.287326	0.280027	0.002212	0.00376	112.787	2.68547	78.8065	115.449	78.9903	81.6295	43.3375	34.086	72.6945	120.257	62.4649	228.563	223.786	196.673
1.10.7	1000	999	9.41875	4.18934	0	0	0	0	0	0	0	0	0	0	0	0.000932	0	0.0041	0	7.53671	27.4307	20.2285	14.8707	11.4456	11.109	13.3656	12.2876	10.6478	19.7799	16.8761	14.1209
1.10.7	1000	1000	7.31097	3.73674	0	0	0	0	0	0	0	0	0.003633	0	0	0.000242	0.007508	0.046016	0	5.47082	20.2897	11.7367	13.3277	8.7675	11.0896	11.2025	10.9322	8.19738	13.8561	13.4708	10.3303
